# Supplementary material for: Energetics and optimal molecular packing for singlet fission in BN-doped perylenes: electronic adiabatic state basis screening
Source: Royal Society of Chemistry journal article supplement (doi:10.1039/d1cp01762d), 2021-01-01
Supplement: d1cp01762d1.pdf [file d1cp01762d1.pdf]

# Energetics and Optimal Molecular Packing for Singlet Fission in BN-doped Perylenes: Electronic Adiabatic State Basis Screening - Supporting Information

Anurag Singh,<sup>a</sup> Alexander Humeniuk<sup>†a</sup>, Merle I. S. Röhr<sup>\*a</sup>

<sup>a</sup> Center for Nanosystems Chemistry, Julius-Maximilians-Universität Würzburg, Am Hubland 97070 Würzburg, Germany

<sup>†</sup> E-mail: alexander.humeniuk@gmail.com

\* E-mail: merle.roehr@uni-wuerzburg.de

## Contents

|   |                                                                                           |    |
|---|-------------------------------------------------------------------------------------------|----|
| 1 | Ab initio comparison                                                                      | 1  |
| 2 | Properties of the BN-doped perylene isomers and undoped perylene and Molecular Structures | 3  |
| 3 | Appendix: Effect of Derivative on density matrix                                          | 16 |
| 4 | Appendix: Rotation of Best molecule                                                       | 18 |

## 1 Ab initio comparison

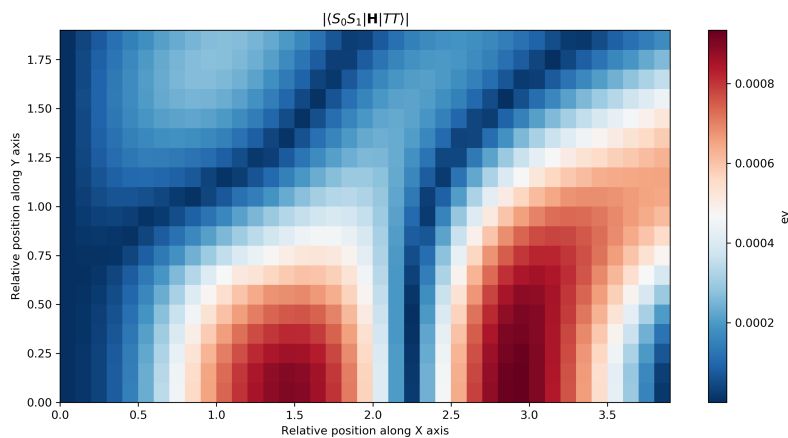

Fig. 1  $|(S_0S_1|H|TT)|$

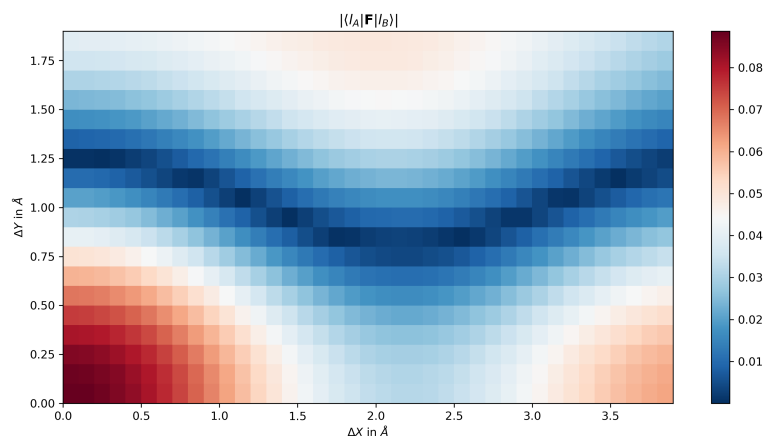Fig. 2  $|(I_A|F|I_B)|$ 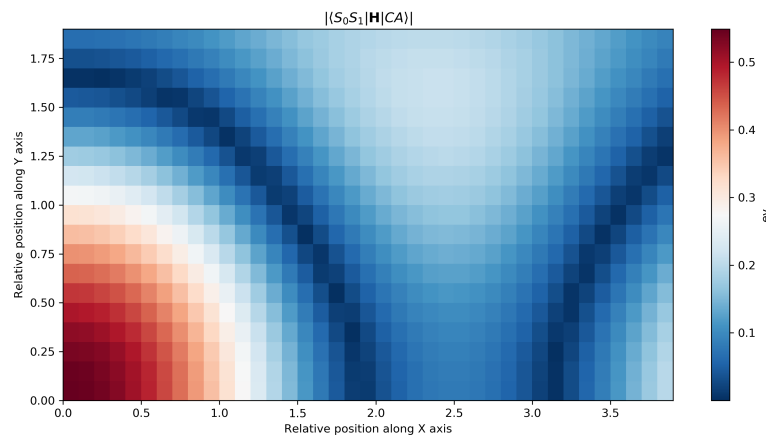Fig. 3  $|(S_0 S_1|H|CA)|$

## 2 Properties of the BN-doped perylene isomers and undoped perylene and Molecular Structures

Table S1: PG: point group, LS: type of Lewis structure,  $y_0$ : biradical character,  $f$ :  $S_0 \rightarrow S_1$  oscillator strength, diabatic: position and value of maximum of the diabatic coupling  $|T_{RP}|^2$  in a scan of the relative displacement of two cofacially stacked dimers (vertical separation  $\Delta Z = 3.5 \text{ \AA}$ ).

† :  $E(S_1)_{\text{CASPT2}} \geq 1.8\text{eV}$   
‡ :  $E(T_1)_{\text{TD-DFT}} \geq 0.8\text{eV}$   
 $\varepsilon$  :  $\Delta E_{ST(\text{TD-DFT})} \geq -0.3\text{eV}$   
 $\gamma$  :  $\Delta E_{TT(\text{CASPT2})} \geq -0.3\text{eV}$   
 $\eta$  :  $\Delta E_{TT(\text{CASPT2})} \leq -0.2\text{eV}$   
\* :  $\Delta E_{TT(\text{TD-DFT})} \leq -0.2\text{eV}$

| Molecule   | PG       | LS   | CASPT2           |                  |                         |                         |       | TD-DFT           |                  |                         |                         |      | diabatic                       |                                |                                   |
|------------|----------|------|------------------|------------------|-------------------------|-------------------------|-------|------------------|------------------|-------------------------|-------------------------|------|--------------------------------|--------------------------------|-----------------------------------|
|            |          |      | $E(S_1)$<br>(eV) | $E(T_1)$<br>(eV) | $\Delta E_{ST}$<br>(eV) | $\Delta E_{TT}$<br>(eV) | $y_0$ | $E(S_1)$<br>(eV) | $E(T_1)$<br>(eV) | $\Delta E_{ST}$<br>(eV) | $\Delta E_{TT}$<br>(eV) | $f$  | $\Delta X$<br>( $\text{\AA}$ ) | $\Delta Y$<br>( $\text{\AA}$ ) | $ T_{RP} ^2$<br>( $\text{eV}^2$ ) |
| BN1-0      | $C_s$    | BN   | 3.20             | 2.15             | 1.10                    | 1.14                    | 0.07  | 2.76             | 1.82             | 0.88                    | 0.91                    | 0.24 | 0.70                           | -0.10                          | $7.58 \times 10^{-05}$            |
| BN1-1 † ‡  | $C_s$    | BN   | 2.83             | 1.48             | 0.13                    | 0.10                    | 0.07  | 2.43             | 1.50             | 0.57                    | 0.50                    | 0.21 | 0.70                           | 0.30                           | $8.34 \times 10^{-05}$            |
| BN1-2 † ‡  | $C_s$    | BN   | 2.64             | 1.58             | 0.53                    | 0.44                    | 0.06  | 2.33             | 1.29             | 0.25                    | -0.10                   | 0.27 | -0.70                          | 0.10                           | $5.32 \times 10^{-05}$            |
| BN1-3      | $C_s$    | BN   | 3.13             | 2.05             | 0.96                    | 1.02                    | 0.07  | 2.71             | 1.78             | 0.86                    | 0.84                    | 0.25 | -0.60                          | 0.30                           | $5.10 \times 10^{-05}$            |
| BN1-4 † ‡  | $C_s$    | BN   | 2.66             | 1.57             | 0.49                    | 0.44                    | 0.06  | 2.33             | 1.30             | 0.26                    | -0.07                   | 0.27 | 0.70                           | 0.30                           | $6.58 \times 10^{-05}$            |
| BN1-5      | $C_s$    | BN   | 3.31             | 2.73             | 2.16                    | 1.80                    | 0.02  | 2.74             | 1.98             | 1.23                    | 0.98                    | 0.20 | -0.70                          | -0.20                          | $6.54 \times 10^{-05}$            |
| BN1-6      | $C_s$    | BN   | 3.11             | 3.70             | 4.29                    | 2.50                    | 0.07  | 2.64             | 1.90             | 1.17                    | 0.92                    | 0.19 | 0.70                           | -0.20                          | $4.91 \times 10^{-05}$            |
| BN1-7      | $C_s$    | B-N+ | 1.62             | 0.80             | -0.03                   | -1.46                   | 0.04  | 1.67             | 0.72             | -0.23                   | -0.73                   | 0.17 | 0.60                           | 0.30                           | $2.77 \times 10^{-05}$            |
| BN1-8 † ‡  | $C_s$    | BN   | 2.85             | 1.83             | 0.82                    | 1.22                    | 0.06  | 2.36             | 1.54             | 0.73                    | 0.80                    | 0.15 | -0.70                          | 0.10                           | $5.22 \times 10^{-05}$            |
| BN1-9 † ‡  | $C_s$    | BN   | 2.66             | 1.39             | 0.11                    | 0.43                    | 0.07  | 2.30             | 1.46             | 0.61                    | 0.49                    | 0.17 | -0.60                          | -0.30                          | $4.56 \times 10^{-05}$            |
| BN1-10     | $C_{2v}$ | BN   | 3.23             | 1.83             | 0.43                    | 1.62                    | 0.02  | 2.68             | 1.77             | 0.87                    | 1.02                    | 0.20 | 0.70                           | -0.00                          | $7.13 \times 10^{-05}$            |
| BN1-11 † ‡ | $C_s$    | BN   | 2.73             | 1.71             | 0.68                    | 1.10                    | 0.06  | 2.31             | 1.52             | 0.74                    | 0.68                    | 0.16 | -0.70                          | 0.10                           | $4.64 \times 10^{-05}$            |
| BN1-12     | $C_{2v}$ | BN   | 3.19             | 1.81             | 0.43                    | 1.59                    | 0.02  | 2.65             | 1.74             | 0.84                    | 0.99                    | 0.21 | -0.70                          | -0.00                          | $5.91 \times 10^{-05}$            |
| BN2-0      | $C_s$    | BN   | 3.47             | 2.73             | 2.00                    | 1.72                    | 0.06  | 2.87             | 2.12             | 1.37                    | 1.24                    | 0.19 | 0.70                           | 0.20                           | $8.14 \times 10^{-05}$            |
| BN2-1      | $C_s$    | BN   | 3.33             | 2.63             | 1.94                    | 1.80                    | 0.05  | 2.69             | 1.95             | 1.21                    | 1.17                    | 0.17 | 0.70                           | -0.20                          | $5.25 \times 10^{-05}$            |
| BN2-2      | $C_s$    | B-N+ | 1.75             | 0.66             | -0.42                   | -1.84                   | 0.08  | 1.80             | 0.71             | -0.37                   | -0.83                   | 0.19 | -0.70                          | -0.10                          | $3.96 \times 10^{-05}$            |
| BN2-3 † ‡  | $C_s$    | B-N+ | 2.63             | 1.45             | 0.28                    | 0.47                    | 0.15  | 2.04             | 1.25             | 0.46                    | 0.88                    | 0.07 | -0.40                          | 2.80                           | $4.45 \times 10^{-05}$            |
| BN2-4      | $C_s$    | BN   | 3.46             | 2.95             | 2.45                    | 1.70                    | 0.08  | 2.78             | 2.12             | 1.45                    | 1.41                    | 0.16 | -0.80                          | -0.20                          | $6.55 \times 10^{-05}$            |
| BN2-5 † ‡  | $C_s$    | BN   | 2.69             | 1.69             | 0.68                    | 0.39                    | 0.08  | 2.36             | 1.37             | 0.39                    | 0.10                    | 0.23 | -0.80                          | -0.30                          | $6.82 \times 10^{-05}$            |
| BN2-6      | $C_s$    | BN   | 3.28             | 2.38             | 1.49                    | 1.56                    | 0.03  | 2.78             | 1.97             | 1.15                    | 1.09                    | 0.19 | 2.60                           | 0.20                           | $1.26 \times 10^{-05}$            |
| BN2-7 † ‡  | $C_s$    | BN   | 2.65             | 1.73             | 0.80                    | 0.45                    | 0.07  | 2.35             | 1.38             | 0.42                    | 0.27                    | 0.23 | 0.70                           | -0.20                          | $5.64 \times 10^{-05}$            |
| BN2-8 † ‡  | $C_s$    | BN   | 2.97             | 1.78             | 0.58                    | 0.28                    | 0.07  | 2.56             | 1.62             | 0.69                    | 0.74                    | 0.18 | -0.80                          | -0.40                          | $8.98 \times 10^{-05}$            |
| BN2-9      | $C_{2h}$ | BN   | 3.42             | 2.54             | 1.66                    | 1.79                    | 0.03  | 2.92             | 2.02             | 1.13                    | 1.43                    | 0.21 | 0.60                           | -0.40                          | $1.28 \times 10^{-04}$            |
| BN2-10     | $C_s$    | BN   | 3.01             | 1.96             | 0.91                    | 1.42                    | 0.06  | 2.55             | 1.71             | 0.86                    | 1.11                    | 0.14 | 2.70                           | 0.70                           | $1.30 \times 10^{-05}$            |
| BN2-11     | $C_s$    | B-N+ | 1.67             | 1.02             | 0.38                    | -0.04                   | 0.04  | 1.57             | 0.79             | 0.01                    | -0.10                   | 0.13 | -0.70                          | -0.00                          | $1.92 \times 10^{-05}$            |
| BN2-12     | $C_s$    | BN   | 3.35             | 2.87             | 2.38                    | 2.19                    | 0.01  | 2.79             | 2.13             | 1.46                    | 1.47                    | 0.17 | -0.70                          | 0.40                           | $7.72 \times 10^{-05}$            |
| BN2-13     | $C_s$    | BN   | 3.36             | 2.30             | 1.24                    | 2.05                    | 0.08  | 2.72             | 1.88             | 1.04                    | 1.18                    | 0.15 | 0.70                           | -0.20                          | $8.18 \times 10^{-05}$            |
| BN2-14 † ‡ | $C_s$    | BN   | 2.81             | 1.68             | 0.55                    | 0.19                    | 0.08  | 2.37             | 1.54             | 0.71                    | 0.44                    | 0.14 | -0.60                          | 0.30                           | $5.68 \times 10^{-05}$            |
| BN2-15 † ‡ | $C_s$    | B-N+ | 2.72             | 2.19             | 1.66                    | 1.16                    | 0.04  | 2.16             | 1.52             | 0.88                    | 0.55                    | 0.10 | 0.80                           | -0.40                          | $6.01 \times 10^{-05}$            |
| BN2-16     | $C_s$    | BN   | 3.46             | 2.51             | 1.56                    | 2.00                    | 0.07  | 2.69             | 1.83             | 0.96                    | 1.26                    | 0.19 | -0.70                          | -0.20                          | $6.28 \times 10^{-05}$            |
| BN2-17 † ‡ | $C_s$    | BN   | 2.94             | 3.07             | 3.20                    | 2.07                    | 0.06  | 2.29             | 1.70             | 1.11                    | 0.67                    | 0.10 | -0.70                          | -0.00                          | $5.14 \times 10^{-05}$            |
| BN2-18     | $C_s$    | BN   | 3.52             | 2.71             | 1.90                    | 1.49                    | 0.07  | 2.86             | 2.05             | 1.24                    | 1.19                    | 0.16 | 0.70                           | -0.40                          | $8.67 \times 10^{-05}$            |
| BN2-19 † ‡ | $C_s$    | BN   | 2.91             | 1.78             | 0.66                    | 0.69                    | 0.08  | 2.47             | 1.57             | 0.67                    | 0.42                    | 0.21 | 0.70                           | -0.30                          | $8.07 \times 10^{-05}$            |
| BN2-20     | $C_s$    | BN   | 3.38             | 2.15             | 0.92                    | 2.01                    | 0.08  | 2.61             | 1.86             | 1.11                    | 1.61                    | 0.04 | -0.30                          | 3.00                           | $2.65 \times 10^{-05}$            |
| BN2-21     | $C_s$    | B-N+ | 1.71             | 0.93             | 0.15                    | -0.63                   | 0.05  | 1.67             | 0.79             | -0.10                   | -0.55                   | 0.16 | 0.60                           | -0.40                          | $2.68 \times 10^{-05}$            |
| BN2-22     | $C_s$    | BN   | 3.09             | 2.66             | 2.23                    | 2.47                    | 0.07  | 2.65             | 1.91             | 1.17                    | 1.46                    | 0.19 | 0.80                           | 0.30                           | $6.64 \times 10^{-05}$            |
| BN2-23     | $C_s$    | BN   | 3.12             | 1.73             | 0.35                    | 0.20                    | 0.08  | 2.72             | 1.67             | 0.62                    | 0.94                    | 0.21 | -0.40                          | 3.10                           | $1.42 \times 10^{-05}$            |
| BN2-24     | $C_{2v}$ | BN   | 3.34             | 2.86             | 2.37                    | 2.80                    | 0.02  | 2.89             | 1.97             | 1.05                    | 1.58                    | 0.04 | 0.70                           | -0.00                          | $8.36 \times 10^{-05}$            |

| Molecule                    | PG       | LS     | CASPT2           |                  |                         |                         |       | TD-DFT           |                  |                         |                         |      | diabatic          |                   |                                    |
|-----------------------------|----------|--------|------------------|------------------|-------------------------|-------------------------|-------|------------------|------------------|-------------------------|-------------------------|------|-------------------|-------------------|------------------------------------|
|                             |          |        | $E(S_1)$<br>(eV) | $E(T_1)$<br>(eV) | $\Delta E_{ST}$<br>(eV) | $\Delta E_{TT}$<br>(eV) | $y_0$ | $E(S_1)$<br>(eV) | $E(T_1)$<br>(eV) | $\Delta E_{ST}$<br>(eV) | $\Delta E_{TT}$<br>(eV) | $f$  | $\Delta X$<br>(Å) | $\Delta Y$<br>(Å) | $ T_{RP} ^2$<br>(eV <sup>2</sup> ) |
| BN2-25                      | $C_s$    | $BN$   | 3.24             | 3.11             | 2.98                    | 2.40                    | 0.06  | 2.65             | 1.89             | 1.12                    | 1.16                    | 0.17 | -0.70             | -0.20             | $5.69 \times 10^{-05}$             |
| BN2-26 <sup>† ‡</sup>       | $C_s$    | $BN$   | 2.78             | 1.99             | 1.20                    | 0.99                    | 0.06  | 2.40             | 1.46             | 0.53                    | 0.40                    | 0.22 | -0.70             | -0.00             | $7.38 \times 10^{-05}$             |
| BN2-27 <sup>† ‡</sup>       | $C_s$    | $BN$   | 2.85             | 1.74             | 0.63                    | 0.54                    | 0.07  | 2.46             | 1.63             | 0.80                    | 0.69                    | 0.16 | 0.50              | -3.60             | $1.07 \times 10^{-05}$             |
| BN2-28                      | $C_s$    | $BN$   | 3.43             | 2.45             | 1.47                    | 2.22                    | 0.02  | 2.71             | 1.93             | 1.14                    | 1.33                    | 0.13 | 0.70              | -0.10             | $8.67 \times 10^{-05}$             |
| BN2-29 <sup>† ‡</sup>       | $C_s$    | $BN$   | 2.63             | 1.70             | 0.77                    | 0.70                    | 0.07  | 2.26             | 1.52             | 0.79                    | 0.50                    | 0.12 | 0.70              | 0.20              | $4.10 \times 10^{-05}$             |
| BN2-30 <sup>† ‡</sup>       | $C_s$    | $BN$   | 2.86             | 1.85             | 0.83                    | 1.24                    | 0.06  | 2.40             | 1.64             | 0.88                    | 0.79                    | 0.14 | 0.80              | 0.10              | $4.30 \times 10^{-05}$             |
| BN2-31                      | $C_s$    | $BN$   | 3.48             | 2.34             | 1.20                    | 2.22                    | 0.02  | 2.75             | 1.92             | 1.09                    | 1.39                    | 0.17 | 0.70              | -0.20             | $7.94 \times 10^{-05}$             |
| BN2-32 <sup>† ‡</sup>       | $C_s$    | $BN$   | 2.79             | 1.70             | 0.61                    | 1.04                    | 0.06  | 2.31             | 1.58             | 0.86                    | 0.72                    | 0.13 | 0.70              | -0.20             | $5.37 \times 10^{-05}$             |
| BN2-33 <sup>† ‡</sup>       | $C_s$    | $BN$   | 2.83             | 1.63             | 0.42                    | 0.37                    | 0.06  | 2.42             | 1.40             | 0.37                    | 0.17                    | 0.25 | -0.70             | 0.30              | $8.67 \times 10^{-05}$             |
| BN2-34                      | $C_s$    | $BN$   | 3.37             | 3.15             | 2.94                    | 2.54                    | 0.08  | 2.78             | 2.10             | 1.41                    | 1.40                    | 0.18 | 0.70              | -0.30             | $8.33 \times 10^{-05}$             |
| BN2-35                      | $C_s$    | $BN$   | 3.31             | 3.68             | 4.06                    | 2.91                    | 0.07  | 2.82             | 2.14             | 1.46                    | 1.47                    | 0.17 | 0.70              | 0.10              | $5.71 \times 10^{-05}$             |
| BN2-36 <sup>† ‡ ε</sup>     | $C_s$    | $B-N+$ | 2.02             | 1.50             | 0.98                    | 0.44                    | 0.05  | 1.80             | 0.96             | 0.12                    | 0.27                    | 0.14 | -3.10             | -0.10             | $8.90 \times 10^{-06}$             |
| BN2-37 <sup>† ‡</sup>       | $C_s$    | $BN$   | 2.80             | 1.92             | 1.04                    | 1.31                    | 0.06  | 2.32             | 1.62             | 0.93                    | 0.90                    | 0.11 | 0.70              | 0.30              | $5.72 \times 10^{-05}$             |
| BN2-38                      | $C_{2v}$ | $BN$   | 3.38             | 2.50             | 1.63                    | 1.70                    | 0.05  | 2.79             | 1.97             | 1.15                    | 1.35                    | 0.18 | -0.70             | -0.00             | $8.81 \times 10^{-05}$             |
| BN2-39 <sup>† ‡</sup>       | $C_s$    | $BN$   | 2.97             | 1.70             | 0.43                    | 0.41                    | 0.07  | 2.46             | 1.62             | 0.78                    | 0.77                    | 0.16 | -0.70             | 0.40              | $1.20 \times 10^{-04}$             |
| BN2-40 <sup>† ‡</sup>       | $C_s$    | $BN$   | 2.83             | 1.79             | 0.75                    | 0.00                    | 0.05  | 2.46             | 1.43             | 0.40                    | 0.32                    | 0.24 | 0.80              | -0.00             | $5.66 \times 10^{-05}$             |
| BN2-41                      | $C_s$    | $BN$   | 3.28             | 2.34             | 1.40                    | 1.62                    | 0.07  | 2.82             | 1.94             | 1.06                    | 1.07                    | 0.23 | 0.70              | 0.20              | $5.56 \times 10^{-05}$             |
| BN2-42 <sup>† ‡</sup>       | $C_s$    | ?      | 2.70             | 1.18             | -0.35                   | -0.32                   | 0.08  | 2.29             | 1.29             | 0.29                    | 0.00                    | 0.23 | 0.70              | 0.20              | $9.82 \times 10^{-05}$             |
| BN2-43 <sup>† ‡</sup>       | $C_s$    | $BN$   | 2.65             | 1.31             | -0.04                   | -0.08                   | 0.07  | 2.34             | 1.39             | 0.44                    | 0.13                    | 0.21 | 0.70              | 0.30              | $8.60 \times 10^{-05}$             |
| BN2-44 <sup>† ‡</sup>       | $C_s$    | $B-N+$ | 2.96             | 1.92             | 0.88                    | 0.72                    | 0.06  | 2.58             | 1.73             | 0.88                    | 0.96                    | 0.18 | 0.70              | 0.50              | $1.27 \times 10^{-04}$             |
| BN2-45                      | $C_s$    | $B-N+$ | 3.14             | 1.51             | -0.12                   | 0.56                    | 0.16  | 2.03             | 1.41             | 0.80                    | 1.33                    | 0.11 | 0.50              | -2.70             | $7.58 \times 10^{-05}$             |
| BN2-46                      | $C_s$    | $B-N+$ | 1.55             | 0.49             | -0.57                   | -1.60                   | 0.07  | 1.58             | 0.58             | -0.43                   | -0.75                   | 0.17 | -0.70             | -0.10             | $4.88 \times 10^{-05}$             |
| BN2-47 <sup>† ‡</sup>       | $C_s$    | $BN$   | 2.89             | 1.67             | 0.45                    | 1.27                    | 0.09  | 2.38             | 1.45             | 0.53                    | 0.94                    | 0.17 | 0.70              | 0.20              | $7.40 \times 10^{-05}$             |
| BN2-48                      | $C_s$    | $BN$   | 3.22             | 2.05             | 0.88                    | 0.74                    | 0.07  | 2.53             | 1.78             | 1.04                    | 1.13                    | 0.17 | 0.70              | 0.50              | $1.24 \times 10^{-04}$             |
| BN2-49 <sup>† ‡</sup>       | $C_s$    | $BN$   | 2.52             | 1.25             | -0.02                   | -0.06                   | 0.06  | 2.20             | 1.21             | 0.23                    | 0.12                    | 0.23 | -0.70             | -0.40             | $1.18 \times 10^{-04}$             |
| BN2-50 <sup>† ‡</sup>       | $C_s$    | $BN$   | 2.75             | 1.65             | 0.55                    | 0.28                    | 0.07  | 2.35             | 1.55             | 0.75                    | 0.49                    | 0.16 | 0.70              | 0.20              | $4.27 \times 10^{-05}$             |
| BN2-51 <sup>† ‡ ε γ η</sup> | $C_s$    | $BN$   | 2.44             | 1.14             | -0.16                   | -0.23                   | 0.06  | 2.16             | 1.17             | 0.18                    | -0.06                   | 0.21 | 0.70              | 0.20              | $6.05 \times 10^{-05}$             |
| BN2-52 <sup>† ‡</sup>       | $C_{2h}$ | $BN$   | 2.98             | 1.58             | 0.17                    | 0.27                    | 0.06  | 2.61             | 1.48             | 0.36                    | 0.71                    | 0.33 | -0.70             | -0.50             | $2.09 \times 10^{-04}$             |
| BN2-53 <sup>† ‡</sup>       | $C_s$    | $BN$   | 2.56             | 1.55             | 0.53                    | 1.11                    | 0.07  | 2.35             | 1.54             | 0.73                    | 1.00                    | 0.06 | 0.70              | 0.40              | $8.18 \times 10^{-05}$             |
| BN2-54                      | $C_s$    | $B-N+$ | 1.40             | 0.58             | -0.24                   | -1.68                   | 0.06  | 1.54             | 0.48             | -0.58                   | -0.89                   | 0.14 | 2.80              | -0.70             | $5.12 \times 10^{-05}$             |
| BN2-55 <sup>† ‡</sup>       | $C_s$    | $BN$   | 2.72             | 1.86             | 1.00                    | 0.47                    | 0.05  | 2.38             | 1.72             | 1.05                    | 0.71                    | 0.13 | 2.70              | -0.30             | $1.61 \times 10^{-05}$             |
| BN2-56                      | $C_s$    | $BN$   | 3.41             | 2.81             | 2.21                    | 2.04                    | 0.06  | 2.74             | 1.82             | 0.90                    | 0.72                    | 0.26 | -0.70             | -0.20             | $8.54 \times 10^{-05}$             |
| BN2-57                      | $C_s$    | $B-N+$ | 1.37             | 0.87             | 0.36                    | -1.40                   | 0.04  | 1.42             | 0.79             | 0.17                    | -0.57                   | 0.06 | -0.80             | -0.60             | $3.76 \times 10^{-05}$             |
| BN2-58                      | $C_s$    | $BN$   | 3.41             | 2.75             | 2.08                    | 2.35                    | 0.06  | 2.49             | 1.98             | 1.48                    | 1.47                    | 0.09 | 0.70              | -0.30             | $6.84 \times 10^{-05}$             |
| BN2-59 <sup>† ‡</sup>       | $C_s$    | $B-N+$ | 1.90             | 1.16             | 0.41                    | -0.78                   | 0.05  | 1.76             | 0.99             | 0.22                    | -0.34                   | 0.11 | 2.80              | 0.50              | $9.87 \times 10^{-06}$             |
| BN2-60 <sup>† ‡</sup>       | $C_s$    | $B-N+$ | 2.58             | 1.24             | -0.11                   | -0.21                   | 0.17  | 2.03             | 1.16             | 0.29                    | 0.48                    | 0.07 | 0.70              | 0.60              | $1.03 \times 10^{-04}$             |
| BN2-61                      | $C_s$    | $B-N+$ | 1.60             | 0.55             | -0.50                   | -1.53                   | 0.07  | 1.57             | 0.69             | -0.19                   | -0.85                   | 0.14 | -0.70             | -0.00             | $3.53 \times 10^{-05}$             |
| BN2-62 <sup>† ‡</sup>       | $C_s$    | $BN$   | 2.86             | 1.94             | 1.03                    | 1.35                    | 0.06  | 2.48             | 1.73             | 0.99                    | 0.77                    | 0.18 | 0.80              | 0.30              | $7.40 \times 10^{-05}$             |
| BN2-63 <sup>† ‡</sup>       | $C_s$    | $BN$   | 2.76             | 1.60             | 0.43                    | 0.52                    | 0.07  | 2.39             | 1.51             | 0.62                    | 0.34                    | 0.19 | 2.50              | -1.00             | $7.09 \times 10^{-06}$             |
| BN2-64 <sup>† ‡ ε</sup>     | $C_s$    | $B-N+$ | 2.44             | 0.84             | -0.76                   | -0.99                   | 0.20  | 1.85             | 0.81             | -0.23                   | -0.73                   | 0.17 | 2.50              | -1.10             | $4.80 \times 10^{-05}$             |
| BN2-65 <sup>† ‡</sup>       | $C_s$    | $BN$   | 2.55             | 1.42             | 0.28                    | -0.02                   | 0.07  | 2.36             | 1.41             | 0.46                    | 0.31                    | 0.20 | 0.70              | 0.20              | $5.08 \times 10^{-05}$             |
| BN2-66                      | $C_s$    | $BN$   | 3.01             | 1.63             | 0.26                    | 0.44                    | 0.07  | 2.42             | 1.57             | 0.73                    | 0.82                    | 0.12 | 2.70              | -1.00             | $1.21 \times 10^{-05}$             |
| BN2-67 <sup>† ‡</sup>       | $C_s$    | $BN$   | 2.23             | 1.29             | 0.34                    | -0.21                   | 0.07  | 2.00             | 1.28             | 0.56                    | 0.16                    | 0.13 | 0.40              | 3.60              | $1.26 \times 10^{-05}$             |
| BN2-68 <sup>† ‡</sup>       | $C_s$    | $BN$   | 2.73             | 1.41             | 0.09                    | 0.62                    | 0.07  | 2.35             | 1.46             | 0.56                    | 0.57                    | 0.20 | 0.70              | 0.30              | $7.08 \times 10^{-05}$             |
| BN2-69 <sup>† ‡</sup>       | $C_s$    | $BN$   | 2.77             | 2.46             | 2.14                    | 1.58                    | 0.07  | 2.31             | 1.57             | 0.83                    | 0.74                    | 0.11 | 0.70              | 0.30              | $6.85 \times 10^{-05}$             |
| BN2-70 <sup>† ‡</sup>       | $C_s$    | $BN$   | 2.44             | 1.51             | 0.57                    | 0.41                    | 0.07  | 2.03             | 1.33             | 0.64                    | 0.34                    | 0.12 | 0.80              | 0.10              | $5.43 \times 10^{-05}$             |
| BN2-71 <sup>† ‡ ε γ</sup>   | $C_s$    | $BN$   | 2.46             | 1.13             | -0.20                   | -0.06                   | 0.07  | 2.13             | 1.13             | 0.14                    | -0.04                   | 0.23 | 0.70              | -0.10             | $6.23 \times 10^{-05}$             |
| BN2-72                      | $C_s$    | $BN$   | 3.12             | 1.97             | 0.81                    | 0.87                    | 0.07  | 2.48             | 1.72             | 0.95                    | 0.91                    | 0.17 | 0.70              | 0.30              | $7.08 \times 10^{-05}$             |

| Molecule            | PG       | LS     | CASPT2           |                  |                         |                         |       | TD-DFT           |                  |                         |                         |      | diabatic          |                   |                                    |
|---------------------|----------|--------|------------------|------------------|-------------------------|-------------------------|-------|------------------|------------------|-------------------------|-------------------------|------|-------------------|-------------------|------------------------------------|
|                     |          |        | $E(S_1)$<br>(eV) | $E(T_1)$<br>(eV) | $\Delta E_{ST}$<br>(eV) | $\Delta E_{TT}$<br>(eV) | $y_0$ | $E(S_1)$<br>(eV) | $E(T_1)$<br>(eV) | $\Delta E_{ST}$<br>(eV) | $\Delta E_{TT}$<br>(eV) | $f$  | $\Delta X$<br>(Å) | $\Delta Y$<br>(Å) | $ T_{RP} ^2$<br>(eV <sup>2</sup> ) |
| BN2-73 † ‡          | $C_s$    | $BN$   | 2.95             | 2.12             | 1.29                    | 0.68                    | 0.07  | 2.44             | 1.76             | 1.09                    | 0.80                    | 0.13 | 0.70              | 0.50              | $8.13 \times 10^{-05}$             |
| BN2-74              | $C_s$    | $B-N+$ | 1.65             | 1.11             | 0.57                    | -0.24                   | 0.06  | 1.53             | 0.85             | 0.17                    | 0.19                    | 0.08 | 0.80              | 0.40              | $4.14 \times 10^{-05}$             |
| BN2-75 † ‡          | $C_s$    | $BN$   | 2.53             | 1.31             | 0.09                    | 0.57                    | 0.07  | 2.07             | 1.30             | 0.54                    | 0.51                    | 0.11 | 2.70              | -0.50             | $2.04 \times 10^{-05}$             |
| BN2-76 † ‡          | $C_{2v}$ | $BN$   | 2.39             | 1.25             | 0.10                    | 0.14                    | 0.07  | 2.10             | 1.25             | 0.40                    | 0.24                    | 0.14 | -0.70             | -0.00             | $6.61 \times 10^{-05}$             |
| BN2-77 † ‡          | $C_s$    | $BN$   | 2.34             | 1.11             | -0.11                   | -0.09                   | 0.05  | 2.14             | 1.20             | 0.24                    | 0.13                    | 0.20 | 0.80              | 0.30              | $7.06 \times 10^{-05}$             |
| BN2-78 † ‡          | $C_s$    | $BN$   | 3.00             | 1.68             | 0.36                    | 0.23                    | 0.07  | 2.57             | 1.66             | 0.74                    | 0.64                    | 0.22 | 0.20              | 3.40              | $8.40 \times 10^{-06}$             |
| BN2-79              | $C_s$    | $B-N+$ | 1.14             | 0.24             | -0.65                   | -1.80                   | 0.04  | 1.42             | 0.36             | -0.71                   | -1.30                   | 0.15 | -0.50             | -1.50             | $2.84 \times 10^{-05}$             |
| BN2-80 † ‡          | $C_s$    | $BN$   | 2.87             | 1.88             | 0.90                    | 0.79                    | 0.07  | 2.40             | 1.50             | 0.61                    | 0.43                    | 0.22 | -0.70             | 0.10              | $5.91 \times 10^{-05}$             |
| BN2-81 † ‡          | $C_s$    | $BN$   | 2.76             | 1.90             | 1.05                    | 0.28                    | 0.05  | 2.34             | 1.51             | 0.67                    | 0.41                    | 0.21 | -0.70             | -0.00             | $5.09 \times 10^{-05}$             |
| BN2-82 † ‡ ε γ      | $C_s$    | $BN$   | 2.37             | 1.09             | -0.18                   | 0.10                    | 0.05  | 2.12             | 1.02             | -0.08                   | -0.33                   | 0.28 | -0.70             | -0.20             | $5.31 \times 10^{-05}$             |
| BN2-83 † ‡          | $C_s$    | $BN$   | 2.66             | 1.69             | 0.71                    | 0.36                    | 0.07  | 2.34             | 1.34             | 0.34                    | 0.12                    | 0.24 | -0.70             | 0.20              | $4.47 \times 10^{-05}$             |
| BN2-84 † ‡ ε        | $C_{2h}$ | $BN$   | 2.50             | 0.89             | -0.73                   | 0.01                    | 0.05  | 2.16             | 1.06             | -0.03                   | -0.01                   | 0.28 | -0.70             | 0.10              | $5.45 \times 10^{-05}$             |
| BN2-85 † ‡          | $C_s$    | $BN$   | 2.40             | 1.49             | 0.57                    | 0.63                    | 0.06  | 2.04             | 1.19             | 0.34                    | 0.23                    | 0.16 | -0.70             | 0.10              | $4.75 \times 10^{-05}$             |
| BN2-86              | $C_s$    | $B-N+$ | 1.67             | 0.69             | -0.30                   | -0.82                   | 0.04  | 1.67             | 0.66             | -0.34                   | -0.58                   | 0.18 | -0.60             | -0.20             | $3.59 \times 10^{-05}$             |
| BN2-87 † ‡          | $C_s$    | $BN$   | 2.72             | 1.80             | 0.87                    | -0.13                   | 0.06  | 2.37             | 1.47             | 0.57                    | 0.51                    | 0.21 | -0.70             | 0.20              | $4.00 \times 10^{-05}$             |
| BN2-88 † ‡          | $C_s$    | $BN$   | 2.46             | 1.21             | -0.04                   | -0.25                   | 0.07  | 2.20             | 1.34             | 0.48                    | 0.21                    | 0.17 | -0.70             | -0.10             | $3.86 \times 10^{-05}$             |
| BN2-89 † ‡          | $C_s$    | $B-N+$ | 2.76             | 2.04             | 1.31                    | 1.11                    | 0.03  | 2.29             | 1.34             | 0.40                    | 0.31                    | 0.21 | 0.70              | 0.10              | $5.23 \times 10^{-05}$             |
| BN2-90 † ‡          | $C_s$    | $B-N+$ | 1.99             | 1.19             | 0.40                    | 0.17                    | 0.04  | 1.80             | 1.05             | 0.31                    | 0.04                    | 0.11 | -0.60             | 0.10              | $1.59 \times 10^{-05}$             |
| BN2-91 † ‡          | $C_s$    | $BN$   | 2.56             | 1.38             | 0.20                    | 0.47                    | 0.07  | 2.17             | 1.30             | 0.43                    | 0.39                    | 0.19 | 0.70              | -0.10             | $3.68 \times 10^{-05}$             |
| BN2-92 † ‡          | $C_s$    | $B-N+$ | 2.71             | 1.54             | 0.38                    | 0.25                    | 0.18  | 2.15             | 1.22             | 0.30                    | 0.45                    | 0.16 | 0.70              | -0.40             | $7.58 \times 10^{-05}$             |
| BN2-93 † ‡ ε        | $C_s$    | $B-N+$ | 2.19             | 0.94             | -0.31                   | -1.04                   | 0.18  | 1.76             | 0.81             | -0.13                   | -0.41                   | 0.12 | 2.70              | -0.00             | $3.10 \times 10^{-05}$             |
| BN2-94 † ‡          | $C_s$    | $BN$   | 2.90             | 2.11             | 1.32                    | 0.85                    | 0.06  | 2.45             | 1.61             | 0.77                    | 0.43                    | 0.23 | -0.80             | 0.20              | $6.48 \times 10^{-05}$             |
| BN2-95 †            | $C_s$    | $B-N+$ | 2.48             | 0.67             | -1.14                   | -1.11                   | 0.17  | 1.92             | 0.74             | -0.43                   | -0.91                   | 0.25 | 0.70              | -0.40             | $5.45 \times 10^{-05}$             |
| BN2-96              | $C_s$    | $B-N+$ | 1.78             | 1.01             | 0.24                    | -0.64                   | 0.04  | 1.67             | 0.94             | 0.22                    | -0.60                   | 0.11 | -0.60             | 0.40              | $2.90 \times 10^{-05}$             |
| BN2-97              | $C_s$    | $B-N+$ | 1.43             | 0.28             | -0.87                   | -1.94                   | 0.06  | 1.58             | 0.47             | -0.63                   | -1.05                   | 0.18 | -2.90             | 0.60              | $1.32 \times 10^{-05}$             |
| BN2-98 † ‡          | $C_s$    | $BN$   | 2.89             | 2.35             | 1.80                    | 1.87                    | 0.06  | 2.33             | 1.70             | 1.07                    | 0.83                    | 0.14 | -0.70             | -0.00             | $3.86 \times 10^{-05}$             |
| BN2-99 † ‡          | $C_s$    | $BN$   | 2.85             | 1.66             | 0.47                    | 0.73                    | 0.07  | 2.46             | 1.54             | 0.62                    | 0.36                    | 0.23 | -0.60             | -0.20             | $4.52 \times 10^{-05}$             |
| BN2-100 † ‡ ε       | $C_{2v}$ | $B-N+$ | 1.83             | 0.67             | -0.49                   | -0.93                   | 0.03  | 1.84             | 0.82             | -0.20                   | -0.67                   | 0.20 | 0.60              | -0.00             | $2.33 \times 10^{-05}$             |
| BN2-101 † ‡ ε       | $C_s$    | $BN$   | 2.28             | 0.95             | -0.38                   | -0.26                   | 0.06  | 1.99             | 1.07             | 0.15                    | -0.09                   | 0.18 | -0.70             | 0.30              | $4.34 \times 10^{-05}$             |
| BN2-102 † ‡         | $C_s$    | $BN$   | 2.66             | 1.76             | 0.86                    | 0.67                    | 0.06  | 2.31             | 1.38             | 0.45                    | 0.41                    | 0.19 | -0.70             | 0.10              | $5.93 \times 10^{-05}$             |
| BN2-103 † ‡         | $C_s$    | $BN$   | 2.44             | 1.18             | -0.09                   | -0.19                   | 0.06  | 2.15             | 1.19             | 0.22                    | 0.15                    | 0.21 | -0.70             | -0.10             | $4.25 \times 10^{-05}$             |
| BN2-104 † ‡         | $C_s$    | $BN$   | 2.34             | 1.77             | 1.20                    | 0.99                    | 0.05  | 2.02             | 1.17             | 0.32                    | 0.28                    | 0.18 | -0.70             | -0.00             | $4.25 \times 10^{-05}$             |
| BN2-105 † ‡         | $C_s$    | $BN$   | 2.80             | 1.58             | 0.35                    | 0.57                    | 0.06  | 2.33             | 1.34             | 0.34                    | 0.38                    | 0.23 | -0.70             | -0.00             | $4.65 \times 10^{-05}$             |
| BN2-106 † ‡         | $C_s$    | $BN$   | 2.38             | 1.41             | 0.43                    | 0.49                    | 0.05  | 2.09             | 1.20             | 0.32                    | 0.13                    | 0.19 | 0.70              | -0.10             | $4.30 \times 10^{-05}$             |
| BN2-107 † ‡ ε       | $C_s$    | $BN$   | 2.11             | 1.17             | 0.23                    | -0.20                   | 0.04  | 1.97             | 0.99             | 0.00                    | -0.43                   | 0.22 | -0.70             | 0.30              | $5.06 \times 10^{-05}$             |
| BN2-108 † ‡         | $C_s$    | $BN$   | 2.80             | 2.14             | 1.48                    | 0.49                    | 0.05  | 2.30             | 1.55             | 0.81                    | 0.44                    | 0.16 | -0.80             | 0.30              | $5.78 \times 10^{-05}$             |
| BN2-109 † ‡         | $C_s$    | $BN$   | 2.71             | 1.90             | 1.09                    | 0.54                    | 0.06  | 2.38             | 1.50             | 0.64                    | 0.46                    | 0.21 | -0.70             | -0.00             | $3.69 \times 10^{-05}$             |
| BN2-110             | $C_s$    | $B-N+$ | 1.48             | 0.55             | -0.38                   | -1.28                   | 0.07  | 1.53             | 0.53             | -0.47                   | -0.94                   | 0.17 | -0.60             | 0.10              | $3.42 \times 10^{-05}$             |
| BN2-111 † ‡         | $C_s$    | $BN$   | 2.55             | 1.96             | 1.36                    | 1.18                    | 0.06  | 2.23             | 1.30             | 0.38                    | 0.51                    | 0.18 | -0.70             | 0.10              | $4.43 \times 10^{-05}$             |
| BN2-112 † ‡ ε γ η * | $C_{2v}$ | $BN$   | 2.33             | 1.02             | -0.28                   | -0.44                   | 0.06  | 2.05             | 0.96             | -0.12                   | -0.48                   | 0.27 | -0.70             | -0.00             | $5.32 \times 10^{-05}$             |
| BN2-113 † ‡         | $C_s$    | $BN$   | 2.76             | 1.63             | 0.49                    | -0.09                   | 0.06  | 2.36             | 1.37             | 0.38                    | 0.20                    | 0.24 | -0.70             | -0.10             | $3.92 \times 10^{-05}$             |
| BN2-114             | $C_s$    | $BN$   | 3.60             | 2.96             | 2.32                    | 2.32                    | 0.06  | 2.91             | 2.11             | 1.30                    | 1.28                    | 0.21 | -0.70             | -0.00             | $6.35 \times 10^{-05}$             |
| BN2-115             | $C_s$    | $BN$   | 3.25             | 2.59             | 1.92                    | 1.57                    | 0.06  | 2.73             | 2.03             | 1.32                    | 1.16                    | 0.18 | -0.70             | 0.20              | $4.30 \times 10^{-05}$             |
| BN2-116 † ‡         | $C_s$    | $B-N+$ | 2.04             | 1.49             | 0.94                    | 0.64                    | 0.05  | 1.63             | 0.94             | 0.24                    | 0.28                    | 0.10 | 0.60              | -0.00             | $1.28 \times 10^{-05}$             |
| BN2-117 † ‡         | $C_s$    | $B-N+$ | 2.63             | 2.12             | 1.60                    | 1.22                    | 0.04  | 2.16             | 1.51             | 0.87                    | 0.61                    | 0.09 | -0.60             | 0.60              | $4.32 \times 10^{-05}$             |
| BN2-118             | $C_s$    | $BN$   | 3.42             | 2.87             | 2.33                    | 2.18                    | 0.07  | 2.83             | 2.15             | 1.47                    | 1.48                    | 0.18 | -0.60             | 0.20              | $4.70 \times 10^{-05}$             |
| BN2-119 † ‡         | $C_s$    | $BN$   | 2.66             | 1.78             | 0.90                    | 0.58                    | 0.03  | 2.34             | 1.38             | 0.42                    | 0.28                    | 0.25 | -0.70             | -0.20             | $4.14 \times 10^{-05}$             |
| BN2-120             | $C_{2h}$ | $BN$   | 3.38             | 2.41             | 1.44                    | 1.67                    | 0.03  | 2.80             | 1.94             | 1.08                    | 1.33                    | 0.24 | -0.50             | 0.50              | $6.05 \times 10^{-05}$             |

| Molecule                 | PG       | LS     | CASPT2           |                  |                         |                         |            | TD-DFT           |                  |                         |                         |      | diabatic          |                   |                                    |
|--------------------------|----------|--------|------------------|------------------|-------------------------|-------------------------|------------|------------------|------------------|-------------------------|-------------------------|------|-------------------|-------------------|------------------------------------|
|                          |          |        | $E(S_1)$<br>(eV) | $E(T_1)$<br>(eV) | $\Delta E_{ST}$<br>(eV) | $\Delta E_{TT}$<br>(eV) | $\gamma_0$ | $E(S_1)$<br>(eV) | $E(T_1)$<br>(eV) | $\Delta E_{ST}$<br>(eV) | $\Delta E_{TT}$<br>(eV) | $f$  | $\Delta X$<br>(Å) | $\Delta Y$<br>(Å) | $ T_{RP} ^2$<br>(eV <sup>2</sup> ) |
| BN2-121 † ‡              | $C_s$    | $BN$   | 2.93             | 1.78             | 0.63                    | 1.10                    | 0.06       | 2.37             | 1.60             | 0.83                    | 0.81                    | 0.14 | 2.70              | 0.90              | $1.17 \times 10^{-05}$             |
| BN2-122                  | $C_s$    | $B-N+$ | 1.71             | 0.86             | 0.01                    | -0.66                   | 0.05       | 1.67             | 0.79             | -0.10                   | -0.52                   | 0.16 | -0.60             | 0.30              | $2.53 \times 10^{-05}$             |
| BN2-123                  | $C_s$    | $BN$   | 3.23             | 2.64             | 2.06                    | 1.84                    | 0.01       | 2.66             | 2.00             | 1.34                    | 1.24                    | 0.16 | -0.70             | 0.40              | $4.35 \times 10^{-05}$             |
| BN2-124                  | $C_s$    | $BN$   | 3.45             | 2.58             | 1.72                    | 2.03                    | 0.07       | 2.69             | 1.81             | 0.93                    | 1.14                    | 0.21 | -0.70             | 0.10              | $5.90 \times 10^{-05}$             |
| BN2-125 † ‡              | $C_s$    | $BN$   | 2.98             | 1.61             | 0.24                    | 0.08                    | 0.06       | 2.59             | 1.65             | 0.70                    | 0.92                    | 0.20 | -2.60             | 0.20              | $6.85 \times 10^{-06}$             |
| BN2-126 † ‡              | $C_s$    | $B-N+$ | 2.59             | 1.48             | 0.37                    | 0.84                    | 0.13       | 1.98             | 1.26             | 0.54                    | 0.94                    | 0.11 | -2.70             | -0.00             | $1.57 \times 10^{-05}$             |
| BN2-127                  | $C_s$    | $BN$   | 3.28             | 2.21             | 1.13                    | 2.05                    | 0.07       | 2.71             | 1.87             | 1.03                    | 1.31                    | 0.16 | -0.70             | 0.20              | $4.39 \times 10^{-05}$             |
| BN2-128                  | $C_s$    | $BN$   | 3.19             | 2.10             | 1.01                    | 1.99                    | 0.08       | 2.66             | 1.83             | 1.00                    | 1.41                    | 0.19 | -0.70             | 0.10              | $3.91 \times 10^{-05}$             |
| BN2-129                  | $C_s$    | $BN$   | 3.25             | 2.34             | 1.43                    | 2.14                    | 0.01       | 2.70             | 1.94             | 1.19                    | 1.44                    | 0.23 | -0.70             | 0.30              | $5.51 \times 10^{-05}$             |
| BN2-130 † ‡              | $C_s$    | $BN$   | 2.76             | 1.99             | 1.23                    | 0.97                    | 0.06       | 2.41             | 1.46             | 0.50                    | 0.37                    | 0.26 | 0.70              | -0.30             | $5.75 \times 10^{-05}$             |
| BN2-131 † ‡              | $C_s$    | $BN$   | 2.96             | 2.05             | 1.14                    | 1.78                    | 0.07       | 2.35             | 1.67             | 1.00                    | 0.61                    | 0.14 | 0.60              | -0.30             | $4.62 \times 10^{-05}$             |
| BN2-132                  | $C_s$    | $B-N+$ | 1.68             | 1.04             | 0.41                    | 0.04                    | 0.04       | 1.58             | 0.77             | -0.05                   | -0.09                   | 0.15 | 0.60              | -0.40             | $1.66 \times 10^{-05}$             |
| BN2-133                  | $C_s$    | $BN$   | 3.38             | 2.50             | 1.63                    | 1.30                    | 0.06       | 2.79             | 2.00             | 1.22                    | 1.28                    | 0.15 | -0.60             | 0.20              | $3.20 \times 10^{-05}$             |
| BN2-134                  | $C_{2v}$ | $BN$   | 3.28             | 2.87             | 2.46                    | 2.79                    | 0.01       | 2.84             | 1.94             | 1.04                    | 1.44                    | 0.25 | -0.70             | -0.00             | $3.71 \times 10^{-05}$             |
| BN2-135 † ‡              | $C_s$    | $BN$   | 2.73             | 1.60             | 0.46                    | 0.82                    | 0.07       | 2.28             | 1.54             | 0.80                    | 0.78                    | 0.14 | 0.50              | -3.50             | $8.16 \times 10^{-06}$             |
| BN2-136                  | $C_s$    | $BN$   | 3.35             | 2.37             | 1.39                    | 2.19                    | 0.02       | 2.74             | 1.92             | 1.10                    | 1.33                    | 0.18 | -0.60             | 0.30              | $6.28 \times 10^{-05}$             |
| BN2-137 † ‡              | $C_s$    | $BN$   | 2.81             | 1.67             | 0.52                    | 0.70                    | 0.07       | 2.40             | 1.54             | 0.68                    | 0.75                    | 0.15 | 0.60              | 0.20              | $2.69 \times 10^{-05}$             |
| BN2-138 † ‡              | $C_s$    | $BN$   | 2.70             | 1.78             | 0.85                    | 1.23                    | 0.06       | 2.25             | 1.59             | 0.94                    | 0.83                    | 0.12 | 0.70              | -0.10             | $3.14 \times 10^{-05}$             |
| BN2-139                  | $C_s$    | $BN$   | 3.32             | 2.69             | 2.06                    | 2.42                    | 0.07       | 2.65             | 1.86             | 1.07                    | 1.18                    | 0.16 | -0.60             | 0.30              | $5.01 \times 10^{-05}$             |
| BN2-140 † ‡              | $C_s$    | $BN$   | 2.90             | 1.89             | 0.88                    | 1.43                    | 0.06       | 2.44             | 1.65             | 0.86                    | 0.97                    | 0.16 | 0.70              | -0.30             | $4.15 \times 10^{-05}$             |
| BN2-141 † ‡              | $C_s$    | $BN$   | 2.81             | 1.66             | 0.51                    | 0.47                    | 0.06       | 2.41             | 1.43             | 0.44                    | 0.32                    | 0.24 | 0.50              | -3.20             | $7.05 \times 10^{-06}$             |
| BN2-142                  | $C_s$    | $BN$   | 3.47             | 3.15             | 2.83                    | 2.54                    | 0.04       | 2.88             | 2.18             | 1.48                    | 1.50                    | 0.20 | 0.70              | -0.40             | $8.62 \times 10^{-05}$             |
| BN2-143                  | $C_s$    | $BN$   | 3.12             | 2.75             | 2.38                    | 2.11                    | 0.07       | 2.63             | 1.97             | 1.30                    | 1.20                    | 0.18 | -0.60             | 0.20              | $2.95 \times 10^{-05}$             |
| BN2-144                  | $C_s$    | $B-N+$ | 1.72             | 0.70             | -0.32                   | -1.60                   | 0.09       | 1.77             | 0.66             | -0.45                   | -0.77                   | 0.20 | -2.60             | -0.40             | $3.03 \times 10^{-05}$             |
| BN2-145 † ‡              | $C_s$    | $BN$   | 2.98             | 1.98             | 0.98                    | 1.38                    | 0.06       | 2.44             | 1.66             | 0.87                    | 0.92                    | 0.15 | -0.70             | 0.10              | $3.84 \times 10^{-05}$             |
| BN2-146                  | $C_{2v}$ | $BN$   | 3.24             | 2.36             | 1.49                    | 1.53                    | 0.05       | 2.69             | 1.88             | 1.08                    | 1.23                    | 0.20 | 0.60              | -0.00             | $2.93 \times 10^{-05}$             |
| BN2-147                  | $C_s$    | $B-N+$ | 1.57             | 0.48             | -0.60                   | -2.10                   | 0.07       | 1.64             | 0.59             | -0.46                   | -0.96                   | 0.20 | 0.70              | 0.20              | $2.94 \times 10^{-05}$             |
| BN2-148 † ‡              | $C_s$    | ?      | 2.75             | 1.55             | 0.34                    | 0.31                    | 0.08       | 2.31             | 1.34             | 0.38                    | 0.39                    | 0.24 | -0.70             | -0.10             | $6.41 \times 10^{-05}$             |
| BN2-149 † ‡              | $C_s$    | $BN$   | 2.93             | 1.88             | 0.83                    | 0.10                    | 0.06       | 2.52             | 1.55             | 0.58                    | 0.56                    | 0.25 | 0.80              | 0.40              | $9.95 \times 10^{-05}$             |
| BN2-150 † ‡ <sup>ε</sup> | $C_{2h}$ | $BN$   | 2.54             | 0.92             | -0.69                   | 0.12                    | 0.05       | 2.19             | 1.11             | 0.02                    | 0.12                    | 0.28 | -0.70             | -0.40             | $9.41 \times 10^{-05}$             |
| BN2-151 † ‡              | $C_s$    | $BN$   | 2.41             | 1.30             | 0.19                    | 0.38                    | 0.06       | 2.07             | 1.20             | 0.33                    | 0.19                    | 0.17 | 0.70              | 0.40              | $5.70 \times 10^{-05}$             |
| BN2-152                  | $C_s$    | $B-N+$ | 1.41             | 0.39             | -0.64                   | -1.79                   | 0.05       | 1.56             | 0.44             | -0.68                   | -1.10                   | 0.19 | 1.20              | 1.50              | $2.67 \times 10^{-05}$             |
| BN2-153 † ‡              | $C_s$    | $BN$   | 2.61             | 1.81             | 1.02                    | -0.02                   | 0.06       | 2.22             | 1.44             | 0.66                    | 0.30                    | 0.19 | 0.70              | 0.10              | $3.50 \times 10^{-05}$             |
| BN2-154 † ‡              | $C_s$    | $BN$   | 2.42             | 1.07             | -0.29                   | -0.12                   | 0.07       | 2.13             | 1.21             | 0.30                    | 0.16                    | 0.19 | -0.60             | -0.30             | $4.76 \times 10^{-05}$             |
| BN2-155 † ‡              | $C_s$    | $B-N+$ | 2.68             | 1.58             | 0.48                    | 0.21                    | 0.17       | 2.09             | 1.26             | 0.42                    | 0.52                    | 0.11 | 0.70              | 0.60              | $1.01 \times 10^{-04}$             |
| BN2-156 † ‡ <sup>ε</sup> | $C_s$    | $B-N+$ | 2.09             | 0.88             | -0.34                   | -1.53                   | 0.18       | 1.78             | 0.82             | -0.14                   | -0.60                   | 0.14 | 0.80              | 0.10              | $2.14 \times 10^{-05}$             |
| BN2-157 † ‡              | $C_s$    | $BN$   | 2.73             | 1.79             | 0.85                    | 0.72                    | 0.06       | 2.30             | 1.50             | 0.70                    | 0.41                    | 0.19 | -0.70             | -0.20             | $3.69 \times 10^{-05}$             |
| BN2-158 † ‡              | $C_s$    | $B-N+$ | 2.83             | 1.80             | 0.76                    | 0.91                    | 0.02       | 2.31             | 1.32             | 0.34                    | 0.39                    | 0.26 | 0.80              | -0.00             | $5.12 \times 10^{-05}$             |
| BN2-159                  | $C_s$    | $B-N+$ | 1.77             | 0.92             | 0.06                    | -0.53                   | 0.04       | 1.70             | 0.97             | 0.23                    | -0.47                   | 0.12 | 0.70              | 0.30              | $3.54 \times 10^{-05}$             |
| BN2-160                  | $C_s$    | $BN$   | 3.11             | 2.36             | 1.61                    | 1.82                    | 0.06       | 2.40             | 1.76             | 1.11                    | 0.86                    | 0.15 | 0.70              | 0.20              | $4.42 \times 10^{-05}$             |
| BN2-161                  | $C_{2v}$ | $B-N+$ | 1.79             | 0.66             | -0.48                   | -1.54                   | 0.04       | 1.82             | 0.80             | -0.23                   | -0.77                   | 0.20 | -0.40             | 3.70              | $1.45 \times 10^{-05}$             |
| BN2-162 †                | $C_s$    | $B-N+$ | 2.25             | 0.90             | -0.45                   | -1.19                   | 0.20       | 1.62             | 0.74             | -0.14                   | -0.69                   | 0.09 | -0.70             | -0.60             | $8.90 \times 10^{-05}$             |
| BN2-163                  | $C_s$    | $B-N+$ | 1.68             | 0.72             | -0.24                   | -0.62                   | 0.07       | 1.65             | 0.70             | -0.23                   | -0.53                   | 0.16 | 0.70              | -0.10             | $2.19 \times 10^{-05}$             |
| BN2-164 † ‡              | $C_s$    | $BN$   | 2.74             | 2.06             | 1.39                    | 0.85                    | 0.07       | 2.39             | 1.57             | 0.75                    | 0.36                    | 0.22 | 0.70              | 0.30              | $6.00 \times 10^{-05}$             |
| BN2-165 † ‡              | $C_s$    | $BN$   | 2.25             | 1.19             | 0.14                    | 0.07                    | 0.05       | 2.03             | 1.17             | 0.31                    | 0.17                    | 0.16 | 0.70              | 0.20              | $3.54 \times 10^{-05}$             |
| BN2-166 † ‡              | $C_s$    | $BN$   | 2.85             | 1.54             | 0.23                    | 0.41                    | 0.07       | 2.35             | 1.36             | 0.37                    | 0.40                    | 0.22 | 0.70              | 0.30              | $7.31 \times 10^{-05}$             |
| BN2-167 † ‡              | $C_s$    | $BN$   | 2.41             | 1.22             | 0.03                    | -0.09                   | 0.06       | 2.11             | 1.16             | 0.21                    | -0.05                   | 0.19 | 0.60              | 3.40              | $6.83 \times 10^{-06}$             |
| BN2-168 † ‡              | $C_s$    | $BN$   | 2.54             | 1.95             | 1.36                    | 1.21                    | 0.06       | 2.17             | 1.30             | 0.42                    | 0.39                    | 0.18 | 0.70              | 0.30              | $7.01 \times 10^{-05}$             |

| Molecule                                        | PG       | LS          | CASPT2           |                  |                         |                         |       | TD-DFT           |                  |                         |                         |      | diabatic          |                   |                                    |
|-------------------------------------------------|----------|-------------|------------------|------------------|-------------------------|-------------------------|-------|------------------|------------------|-------------------------|-------------------------|------|-------------------|-------------------|------------------------------------|
|                                                 |          |             | $E(S_1)$<br>(eV) | $E(T_1)$<br>(eV) | $\Delta E_{ST}$<br>(eV) | $\Delta E_{TT}$<br>(eV) | $y_0$ | $E(S_1)$<br>(eV) | $E(T_1)$<br>(eV) | $\Delta E_{ST}$<br>(eV) | $\Delta E_{TT}$<br>(eV) | $f$  | $\Delta X$<br>(Å) | $\Delta Y$<br>(Å) | $ T_{RP} ^2$<br>(eV <sup>2</sup> ) |
| BN2-169 † ‡                                     | $C_s$    | <i>BN</i>   | 2.71             | 1.74             | 0.76                    | 0.77                    | 0.06  | 2.32             | 1.37             | 0.42                    | 0.37                    | 0.22 | 0.70              | 0.30              | $6.13 \times 10^{-05}$             |
| BN2-170 † ‡                                     | $C_s$    | <i>BN</i>   | 2.42             | 1.62             | 0.82                    | 0.55                    | 0.07  | 2.10             | 1.24             | 0.37                    | 0.24                    | 0.18 | 0.80              | 0.20              | $5.86 \times 10^{-05}$             |
| BN2-171 † ‡ † † $\varepsilon$ $\gamma$ $\eta$ * | $C_{2v}$ | <i>BN</i>   | 2.42             | 1.14             | -0.14                   | -0.21                   | 0.06  | 2.11             | 1.00             | -0.12                   | -0.34                   | 0.30 | -0.70             | -0.00             | $5.71 \times 10^{-05}$             |
| BN2-172 † ‡                                     | $C_s$    | <i>BN</i>   | 2.99             | 1.97             | 0.95                    | 0.88                    | 0.07  | 2.50             | 1.57             | 0.64                    | 0.54                    | 0.25 | 0.80              | 0.20              | $8.06 \times 10^{-05}$             |
| BN2-173 † ‡                                     | $C_s$    | <i>BN</i>   | 2.61             | 1.98             | 1.35                    | 1.01                    | 0.05  | 2.17             | 1.45             | 0.73                    | 0.27                    | 0.16 | 0.70              | 0.40              | $4.96 \times 10^{-05}$             |
| BN2-174                                         | $C_s$    | <i>B-N+</i> | 1.08             | 0.29             | -0.51                   | -2.04                   | 0.04  | 1.36             | 0.32             | -0.72                   | -1.29                   | 0.14 | 2.60              | -0.90             | $3.71 \times 10^{-05}$             |
| BN2-175 † ‡                                     | $C_s$    | <i>BN</i>   | 2.48             | 1.54             | 0.60                    | 0.74                    | 0.06  | 2.13             | 1.20             | 0.27                    | 0.43                    | 0.21 | 0.70              | 0.20              | $4.46 \times 10^{-05}$             |
| BN2-176                                         | $C_{2h}$ | <i>BN</i>   | 3.67             | 3.41             | 3.14                    | 3.05                    | 0.05  | 2.96             | 2.29             | 1.62                    | 1.68                    | 0.21 | 0.80              | 0.50              | $1.32 \times 10^{-04}$             |
| BN2-177 † ‡                                     | $C_s$    | <i>BN</i>   | 2.88             | 2.33             | 1.79                    | 1.72                    | 0.07  | 2.39             | 1.81             | 1.23                    | 1.35                    | 0.09 | 0.70              | -0.20             | $3.59 \times 10^{-05}$             |
| BN2-178                                         | $C_s$    | <i>B-N+</i> | 1.68             | 1.17             | 0.67                    | -0.17                   | 0.04  | 1.41             | 0.75             | 0.09                    | -0.30                   | 0.11 | -0.70             | -0.20             | $8.88 \times 10^{-06}$             |
| BN2-179                                         | $C_s$    | <i>BN</i>   | 3.43             | 3.69             | 3.94                    | 2.99                    | 0.07  | 2.69             | 2.26             | 1.82                    | 1.58                    | 0.12 | -0.70             | 0.10              | $3.67 \times 10^{-05}$             |
| BN2-180                                         | $C_s$    | <i>B-N+</i> | 3.14             | 1.58             | 0.02                    | 0.97                    | 0.12  | 1.87             | 1.35             | 0.83                    | 1.13                    | 0.08 | 2.70              | -0.50             | $2.07 \times 10^{-05}$             |
| BN2-181                                         | $C_s$    | <i>BN</i>   | 3.58             | 2.98             | 2.38                    | 1.95                    | 0.06  | 2.84             | 2.17             | 1.51                    | 1.80                    | 0.01 | 0.70              | -0.10             | $7.79 \times 10^{-05}$             |
| BN2-182 † ‡                                     | $C_s$    | <i>BN</i>   | 2.94             | 2.44             | 1.94                    | 1.64                    | 0.06  | 2.51             | 1.82             | 1.12                    | 0.99                    | 0.15 | -0.60             | 0.30              | $4.45 \times 10^{-05}$             |
| BN2-183                                         | $C_s$    | <i>BN</i>   | 3.42             | 2.52             | 1.61                    | 1.76                    | 0.07  | 2.70             | 1.82             | 0.94                    | 0.71                    | 0.25 | -0.70             | -0.20             | $6.78 \times 10^{-05}$             |
| BN2-184                                         | $C_s$    | <i>BN</i>   | 3.28             | 2.99             | 2.69                    | 2.73                    | 0.06  | 2.49             | 2.01             | 1.52                    | 1.55                    | 0.12 | 2.80              | -0.50             | $2.96 \times 10^{-05}$             |
| BN2-185                                         | $C_{2v}$ | <i>BN</i>   | 3.94             | 3.67             | 3.40                    | 2.62                    | 0.05  | 3.07             | 2.45             | 1.83                    | 1.92                    | 0.10 | 0.70              | -0.00             | $5.72 \times 10^{-05}$             |
| BN2-186                                         | $C_s$    | <i>BN</i>   | 3.03             | 2.27             | 1.51                    | 1.74                    | 0.06  | 2.28             | 1.75             | 1.21                    | 1.17                    | 0.05 | 2.60              | -1.10             | $2.00 \times 10^{-05}$             |
| BN2-187 † ‡ † $\varepsilon$                     | $C_s$    | <i>B-N+</i> | 1.94             | 1.08             | 0.22                    | -0.18                   | 0.05  | 1.88             | 0.94             | 0.01                    | -0.09                   | 0.20 | -0.70             | -0.20             | $3.48 \times 10^{-05}$             |
| BN2-188                                         | $C_s$    | <i>BN</i>   | 3.04             | 2.68             | 2.32                    | 1.95                    | 0.01  | 2.68             | 1.87             | 1.07                    | 0.78                    | 0.26 | -0.80             | -0.30             | $6.96 \times 10^{-05}$             |
| BN2-189                                         | $C_s$    | <i>BN</i>   | 3.02             | 2.16             | 1.30                    | 1.37                    | 0.07  | 2.45             | 1.79             | 1.14                    | 0.95                    | 0.12 | 0.70              | -0.00             | $3.67 \times 10^{-05}$             |
| BN2-190                                         | $C_s$    | <i>BN</i>   | 3.50             | 2.86             | 2.23                    | 2.59                    | 0.02  | 2.71             | 2.02             | 1.33                    | 1.51                    | 0.15 | -0.70             | -0.30             | $6.87 \times 10^{-05}$             |
| BN2-191 † ‡                                     | $C_s$    | <i>BN</i>   | 2.75             | 1.93             | 1.11                    | 1.01                    | 0.07  | 2.37             | 1.74             | 1.10                    | 0.88                    | 0.12 | 0.60              | 0.40              | $5.35 \times 10^{-05}$             |
| BN2-192                                         | $C_s$    | <i>BN</i>   | 3.09             | 2.05             | 1.01                    | 1.50                    | 0.05  | 2.50             | 1.77             | 1.03                    | 0.94                    | 0.16 | 0.70              | 0.30              | $5.63 \times 10^{-05}$             |
| BN2-193                                         | $C_s$    | <i>BN</i>   | 3.41             | 2.89             | 2.38                    | 2.64                    | 0.02  | 2.81             | 2.12             | 1.43                    | 1.63                    | 0.16 | 0.70              | -0.00             | $6.48 \times 10^{-05}$             |
| BN2-194                                         | $C_s$    | <i>BN</i>   | 3.02             | 2.02             | 1.03                    | 1.50                    | 0.06  | 2.48             | 1.81             | 1.15                    | 1.08                    | 0.14 | 0.80              | -0.10             | $5.71 \times 10^{-05}$             |
| BN2-195                                         | $C_{2v}$ | <i>BN</i>   | 3.42             | 2.54             | 1.66                    | 1.41                    | 0.02  | 2.89             | 2.19             | 1.49                    | 1.46                    | 0.22 | 0.70              | -0.00             | $6.67 \times 10^{-05}$             |
| BN2-196                                         | $C_s$    | <i>BN</i>   | 3.55             | 3.68             | 3.81                    | 2.88                    | 0.07  | 2.71             | 2.25             | 1.78                    | 1.51                    | 0.11 | -0.70             | -0.40             | $5.75 \times 10^{-05}$             |
| BN2-197 † ‡                                     | $C_s$    | <i>BN</i>   | 2.89             | 2.02             | 1.16                    | 1.35                    | 0.06  | 2.43             | 1.73             | 1.03                    | 1.14                    | 0.13 | 0.70              | 0.40              | $6.11 \times 10^{-05}$             |
| BN2-198                                         | $C_s$    | <i>BN</i>   | 3.08             | 2.08             | 1.09                    | 1.43                    | 0.07  | 2.47             | 1.80             | 1.14                    | 1.11                    | 0.14 | 0.70              | -0.30             | $3.50 \times 10^{-05}$             |
| BN2-199 † ‡ † † $\varepsilon$ $\gamma$ $\eta$   | $C_s$    | <i>B-N+</i> | 1.95             | 0.96             | -0.02                   | -0.38                   | 0.05  | 1.90             | 0.96             | 0.01                    | -0.12                   | 0.20 | 2.70              | 0.90              | $1.64 \times 10^{-05}$             |
| BN2-200                                         | $C_{2h}$ | <i>BN</i>   | 3.17             | 3.75             | 4.33                    | 3.06                    | 0.07  | 2.77             | 2.14             | 1.51                    | 1.45                    | 0.17 | -0.70             | 0.20              | $3.90 \times 10^{-05}$             |
| BN2-201                                         | $C_s$    | <i>B-N+</i> | 3.41             | 2.81             | 2.21                    | 1.78                    | 0.02  | 2.48             | 1.72             | 0.97                    | 1.16                    | 0.07 | -0.40             | -3.60             | $6.76 \times 10^{-06}$             |
| BN2-202                                         | $C_s$    | <i>BN</i>   | 3.28             | 2.43             | 1.57                    | 1.66                    | 0.07  | 2.63             | 1.76             | 0.89                    | 0.69                    | 0.23 | -0.70             | 0.10              | $5.48 \times 10^{-05}$             |
| BN2-203 † ‡                                     | $C_s$    | <i>BN</i>   | 2.95             | 2.63             | 2.31                    | 2.38                    | 0.05  | 2.30             | 1.82             | 1.34                    | 1.17                    | 0.09 | -0.60             | -0.00             | $3.55 \times 10^{-05}$             |
| BN2-204                                         | $C_1$    | <i>BN</i>   | 3.86             | 2.96             | 2.06                    | 2.08                    | 0.06  | 2.86             | 2.16             | 1.46                    | 1.69                    | 0.08 | 0.70              | -0.00             | $1.21 \times 10^{-03}$             |
| BN2-205 † ‡                                     | $C_1$    | <i>BN</i>   | 2.90             | 2.49             | 2.09                    | 2.33                    | 0.05  | 2.39             | 1.83             | 1.26                    | 1.25                    | 0.07 | 2.80              | -0.70             | $3.18 \times 10^{-05}$             |
| BN2-206                                         | $C_s$    | <i>BN</i>   | 3.11             | 2.52             | 1.93                    | 2.25                    | 0.07  | 2.50             | 1.92             | 1.34                    | 1.51                    | 0.14 | 0.70              | -0.40             | $4.04 \times 10^{-05}$             |
| BN2-207                                         | $C_s$    | <i>B-N+</i> | 1.67             | 1.19             | 0.71                    | 0.00                    | 0.04  | 1.37             | 0.73             | 0.09                    | -0.28                   | 0.10 | -0.60             | 0.40              | $1.14 \times 10^{-05}$             |
| BN2-208                                         | $C_{2v}$ | <i>BN</i>   | 3.64             | 3.49             | 3.34                    | 2.49                    | 0.04  | 2.91             | 2.34             | 1.76                    | 1.92                    | 0.08 | -0.70             | -0.00             | $2.84 \times 10^{-05}$             |
| BN2-209 † ‡                                     | $C_s$    | <i>BN</i>   | 2.73             | 1.73             | 0.72                    | 1.01                    | 0.07  | 2.30             | 1.60             | 0.89                    | 0.79                    | 0.14 | 0.50              | -3.40             | $7.02 \times 10^{-06}$             |
| BN2-210                                         | $C_s$    | <i>BN</i>   | 3.28             | 2.88             | 2.49                    | 2.64                    | 0.02  | 2.74             | 2.10             | 1.45                    | 1.56                    | 0.14 | 0.70              | -0.20             | $6.19 \times 10^{-05}$             |
| BN2-211 † ‡                                     | $C_s$    | <i>BN</i>   | 2.86             | 1.89             | 0.92                    | 1.07                    | 0.07  | 2.31             | 1.65             | 0.99                    | 0.96                    | 0.13 | -2.50             | -0.60             | $9.32 \times 10^{-06}$             |
| BN2-212 † ‡                                     | $C_s$    | <i>BN</i>   | 2.64             | 1.83             | 1.01                    | 1.30                    | 0.05  | 2.22             | 1.64             | 1.05                    | 0.98                    | 0.10 | 0.70              | -0.00             | $2.43 \times 10^{-05}$             |
| BN2-213                                         | $C_1$    | <i>BN</i>   | 3.46             | 2.80             | 2.14                    | 2.52                    | 0.07  | 2.68             | 2.04             | 1.40                    | 1.50                    | 0.14 | -0.70             | 0.20              | $1.33 \times 10^{-03}$             |
| BN2-214 † ‡                                     | $C_1$    | <i>BN</i>   | 2.91             | 2.29             | 1.67                    | 1.88                    | 0.06  | 2.33             | 1.80             | 1.27                    | 1.22                    | 0.10 | -0.80             | 0.40              | $6.23 \times 10^{-04}$             |
| BN2-215                                         | $C_{2v}$ | <i>BN</i>   | 3.13             | 2.94             | 2.76                    | 2.25                    | 0.05  | 2.79             | 2.14             | 1.50                    | 1.44                    | 0.18 | 0.70              | -0.00             | $4.60 \times 10^{-05}$             |
| BN2-216                                         | $C_1$    | <i>BN</i>   | 3.15             | 2.21             | 1.26                    | 1.64                    | 0.07  | 2.49             | 1.80             | 1.11                    | 1.06                    | 0.13 | 0.80              | 0.10              | $6.05 \times 10^{-04}$             |

| Molecule         | PG       | LS     | CASPT2           |                  |                         |                         |            | TD-DFT           |                  |                         |                         |      | diabatic          |                   |                                    |
|------------------|----------|--------|------------------|------------------|-------------------------|-------------------------|------------|------------------|------------------|-------------------------|-------------------------|------|-------------------|-------------------|------------------------------------|
|                  |          |        | $E(S_1)$<br>(eV) | $E(T_1)$<br>(eV) | $\Delta E_{ST}$<br>(eV) | $\Delta E_{TT}$<br>(eV) | $\gamma_0$ | $E(S_1)$<br>(eV) | $E(T_1)$<br>(eV) | $\Delta E_{ST}$<br>(eV) | $\Delta E_{TT}$<br>(eV) | $f$  | $\Delta X$<br>(Å) | $\Delta Y$<br>(Å) | $ T_{RP} ^2$<br>(eV <sup>2</sup> ) |
| BN2-217          | $C_s$    | $B-N+$ | 1.41             | 0.59             | -0.22                   | -1.85                   | 0.07       | 1.28             | 0.48             | -0.32                   | -0.82                   | 0.08 | 0.50              | 0.80              | $3.17 \times 10^{-05}$             |
| BN2-218 † ‡      | $C_{2h}$ | $B-N+$ | 2.09             | 1.14             | 0.18                    | 0.56                    | 0.01       | 1.93             | 1.18             | 0.44                    | 0.50                    | 0.14 | 0.60              | 0.40              | $2.82 \times 10^{-05}$             |
| BN2-219          | $C_s$    | $B-N+$ | 1.57             | 1.04             | 0.51                    | -0.00                   | 0.06       | 1.40             | 0.78             | 0.16                    | 0.23                    | 0.07 | 0.50              | 0.70              | $1.34 \times 10^{-05}$             |
| BN2-220          | $C_s$    | $B-N+$ | 1.70             | 0.71             | -0.29                   | -0.64                   | 0.05       | 1.79             | 0.75             | -0.29                   | -0.32                   | 0.17 | -3.00             | 0.10              | $2.98 \times 10^{-05}$             |
| BN2-221          | $C_s$    | $B-N+$ | 1.42             | 0.47             | -0.49                   | -2.09                   | 0.06       | 1.57             | 0.50             | -0.57                   | -0.77                   | 0.14 | 0.60              | 0.10              | $2.67 \times 10^{-05}$             |
| BN2-222          | $C_s$    | $B-N+$ | 1.71             | 0.96             | 0.21                    | -0.11                   | 0.07       | 1.49             | 0.75             | 0.02                    | -0.21                   | 0.10 | 0.60              | 0.30              | $2.00 \times 10^{-05}$             |
| BN2-223          | $C_s$    | $B-N+$ | 1.48             | 0.47             | -0.53                   | -1.18                   | 0.07       | 1.44             | 0.54             | -0.36                   | -0.76                   | 0.11 | -2.90             | 0.10              | $2.42 \times 10^{-05}$             |
| BN2-224          | $C_s$    | $B-N+$ | 1.32             | 0.54             | -0.24                   | -1.31                   | 0.03       | 1.45             | 0.59             | -0.26                   | -1.03                   | 0.13 | -0.60             | -0.20             | $1.80 \times 10^{-05}$             |
| BN2-227          | $C_s$    | $B-N+$ | 1.63             | 1.11             | 0.60                    | -0.06                   | 0.06       | 1.37             | 0.74             | 0.12                    | -0.21                   | 0.06 | 0.70              | 0.20              | $1.58 \times 10^{-05}$             |
| BN2-228          | $C_s$    | $B-N+$ | 1.66             | 0.68             | -0.30                   | -1.58                   | 0.07       | 1.60             | 0.70             | -0.20                   | -0.66                   | 0.15 | -0.70             | -0.20             | $3.07 \times 10^{-05}$             |
| BN2-229          | $C_s$    | $B-N+$ | 1.50             | 0.66             | -0.17                   | -0.75                   | 0.04       | 1.75             | 0.67             | -0.42                   | -0.39                   | 0.20 | -2.70             | 1.00              | $3.02 \times 10^{-05}$             |
| BN2-230          | $C_s$    | $B-N+$ | 1.24             | 0.47             | -0.30                   | -1.80                   | 0.04       | 1.43             | 0.55             | -0.32                   | -0.92                   | 0.14 | -0.70             | -0.00             | $2.05 \times 10^{-05}$             |
| BN2-231 † ‡      | $C_{2h}$ | $BN$   | 2.44             | 1.79             | 1.15                    | 1.68                    | 0.01       | 2.13             | 1.70             | 1.27                    | 1.56                    | 0.00 | 3.40              | 0.30              | $9.72 \times 10^{-06}$             |
| BN2-232          | $C_s$    | $BN$   | 3.31             | 2.42             | 1.53                    | 1.63                    | 0.07       | 2.66             | 1.77             | 0.87                    | 0.72                    | 0.25 | -0.70             | -0.00             | $5.40 \times 10^{-05}$             |
| BN2-233          | $C_s$    | $B-N+$ | 1.35             | 0.79             | 0.23                    | -1.67                   | 0.04       | 1.30             | 0.74             | 0.19                    | -0.68                   | 0.04 | -0.50             | 0.40              | $1.37 \times 10^{-05}$             |
| BN2-234 † ‡      | $C_s$    | $BN$   | 2.74             | 1.44             | 0.15                    | 0.65                    | 0.07       | 2.35             | 1.47             | 0.60                    | 0.70                    | 0.17 | 0.60              | -0.20             | $3.73 \times 10^{-05}$             |
| BN2-235 † ‡      | $C_s$    | $BN$   | 2.71             | 1.88             | 1.05                    | 1.26                    | 0.06       | 2.17             | 1.58             | 1.00                    | 0.99                    | 0.04 | -0.70             | 0.30              | $3.71 \times 10^{-05}$             |
| BN2-236 † ‡      | $C_s$    | $BN$   | 2.40             | 1.40             | 0.41                    | 0.61                    | 0.06       | 1.93             | 1.29             | 0.65                    | 0.29                    | 0.09 | 0.60              | 0.30              | $3.38 \times 10^{-05}$             |
| BN2-237 † ‡      | $C_s$    | $BN$   | 2.74             | 1.86             | 0.98                    | 1.30                    | 0.07       | 2.33             | 1.48             | 0.63                    | 0.63                    | 0.19 | 0.70              | 0.10              | $3.81 \times 10^{-05}$             |
| BN2-238 † ‡      | $C_s$    | $BN$   | 2.96             | 1.80             | 0.64                    | 1.15                    | 0.06       | 2.38             | 1.58             | 0.77                    | 0.83                    | 0.16 | -0.70             | 0.30              | $5.96 \times 10^{-05}$             |
| BN2-239 † ‡      | $C_s$    | $BN$   | 2.54             | 1.89             | 1.24                    | 1.54                    | 0.07       | 2.03             | 1.37             | 0.70                    | 0.49                    | 0.13 | 0.70              | -0.10             | $3.40 \times 10^{-05}$             |
| BN2-240 † ‡      | $C_{2v}$ | $BN$   | 2.35             | 1.35             | 0.36                    | 0.58                    | 0.07       | 1.84             | 1.26             | 0.68                    | 0.32                    | 0.06 | 0.70              | -0.00             | $4.16 \times 10^{-05}$             |
| BN2-241 † ‡      | $C_s$    | $BN$   | 2.56             | 1.49             | 0.42                    | 1.05                    | 0.08       | 2.24             | 1.38             | 0.51                    | 0.77                    | 0.17 | 0.60              | 0.20              | $3.43 \times 10^{-05}$             |
| BN2-242 † ‡      | $C_s$    | $B-N+$ | 2.77             | 1.41             | 0.04                    | 0.28                    | 0.16       | 2.25             | 1.30             | 0.36                    | 0.82                    | 0.07 | 0.40              | 0.60              | $2.59 \times 10^{-05}$             |
| BN2-243 † ‡      | $C_{2v}$ | $BN$   | 2.12             | 1.08             | 0.03                    | -0.11                   | 0.07       | 1.84             | 1.11             | 0.38                    | 0.17                    | 0.10 | -0.60             | -0.00             | $2.35 \times 10^{-05}$             |
| BN2-244 † ‡      | $C_s$    | $BN$   | 2.61             | 2.49             | 2.37                    | 1.48                    | 0.07       | 2.20             | 1.55             | 0.91                    | 0.69                    | 0.08 | -0.70             | -0.20             | $4.34 \times 10^{-05}$             |
| BN2-245 † ‡      | $C_{2h}$ | $BN$   | 2.87             | 1.54             | 0.21                    | 0.40                    | 0.05       | 2.50             | 1.47             | 0.43                    | 0.80                    | 0.28 | -0.50             | -3.50             | $3.99 \times 10^{-06}$             |
| BN2-246 † ‡      | $C_s$    | $BN$   | 2.28             | 1.18             | 0.08                    | 0.37                    | 0.07       | 1.91             | 1.23             | 0.54                    | 0.34                    | 0.10 | -0.60             | -0.30             | $3.24 \times 10^{-05}$             |
| BN2-247 † ‡      | $C_s$    | $BN$   | 2.77             | 1.51             | 0.25                    | 0.40                    | 0.07       | 2.27             | 1.50             | 0.73                    | 0.65                    | 0.11 | -0.60             | -0.40             | $4.31 \times 10^{-05}$             |
| BN2-248 † ‡      | $C_s$    | $BN$   | 2.57             | 1.50             | 0.43                    | 1.05                    | 0.07       | 2.43             | 1.52             | 0.61                    | 0.90                    | 0.12 | 0.70              | 0.10              | $3.96 \times 10^{-05}$             |
| BN2-249          | $D_{2h}$ | $BN$   | 3.44             | 1.81             | 0.19                    | 1.61                    | 0.01       | 2.50             | 1.86             | 1.22                    | 1.59                    | 0.00 | -0.70             | -0.00             | $7.99 \times 10^{-05}$             |
| BN2-250 † ‡      | $C_s$    | $BN$   | 2.81             | 1.70             | 0.59                    | 1.07                    | 0.06       | 2.30             | 1.56             | 0.82                    | 0.69                    | 0.13 | 0.70              | 0.10              | $4.60 \times 10^{-05}$             |
| BN2-251          | $C_{2v}$ | $BN$   | 3.39             | 1.86             | 0.34                    | 1.74                    | 0.01       | 2.66             | 1.88             | 1.10                    | 1.50                    | 0.13 | 0.70              | -0.00             | $6.40 \times 10^{-05}$             |
| BN2-252 † ‡      | $C_2$    | $BN$   | 2.42             | 1.49             | 0.57                    | 0.49                    | 0.04       | 1.93             | 1.38             | 0.82                    | 0.45                    | 0.07 | 0.70              | -0.10             | $7.23 \times 10^{-04}$             |
| BN2-253 † ‡      | $C_s$    | $BN$   | 2.69             | 1.83             | 0.96                    | 1.23                    | 0.05       | 2.18             | 1.58             | 0.97                    | 0.89                    | 0.07 | -0.70             | 0.10              | $3.94 \times 10^{-05}$             |
| BN2-254 † ‡      | $C_{2h}$ | $BN$   | 2.81             | 1.56             | 0.31                    | 1.22                    | 0.01       | 2.24             | 1.66             | 1.07                    | 1.33                    | 0.00 | -0.70             | 0.20              | $7.50 \times 10^{-05}$             |
| BN2-255          | $D_{2h}$ | $BN$   | 3.35             | 1.79             | 0.22                    | 1.57                    | 0.01       | 2.57             | 1.82             | 1.06                    | 1.41                    | 0.10 | -0.70             | -0.00             | $5.90 \times 10^{-05}$             |
| perylene-undoped | $D_{2h}$ | ...    | 3.05             | 1.61             | 0.17                    | 0.43                    | 0.02       | 2.66             | 1.66             | 0.67                    | 0.30                    | 0.28 | -0.70             | -0.00             | $6.25 \times 10^{-05}$             |



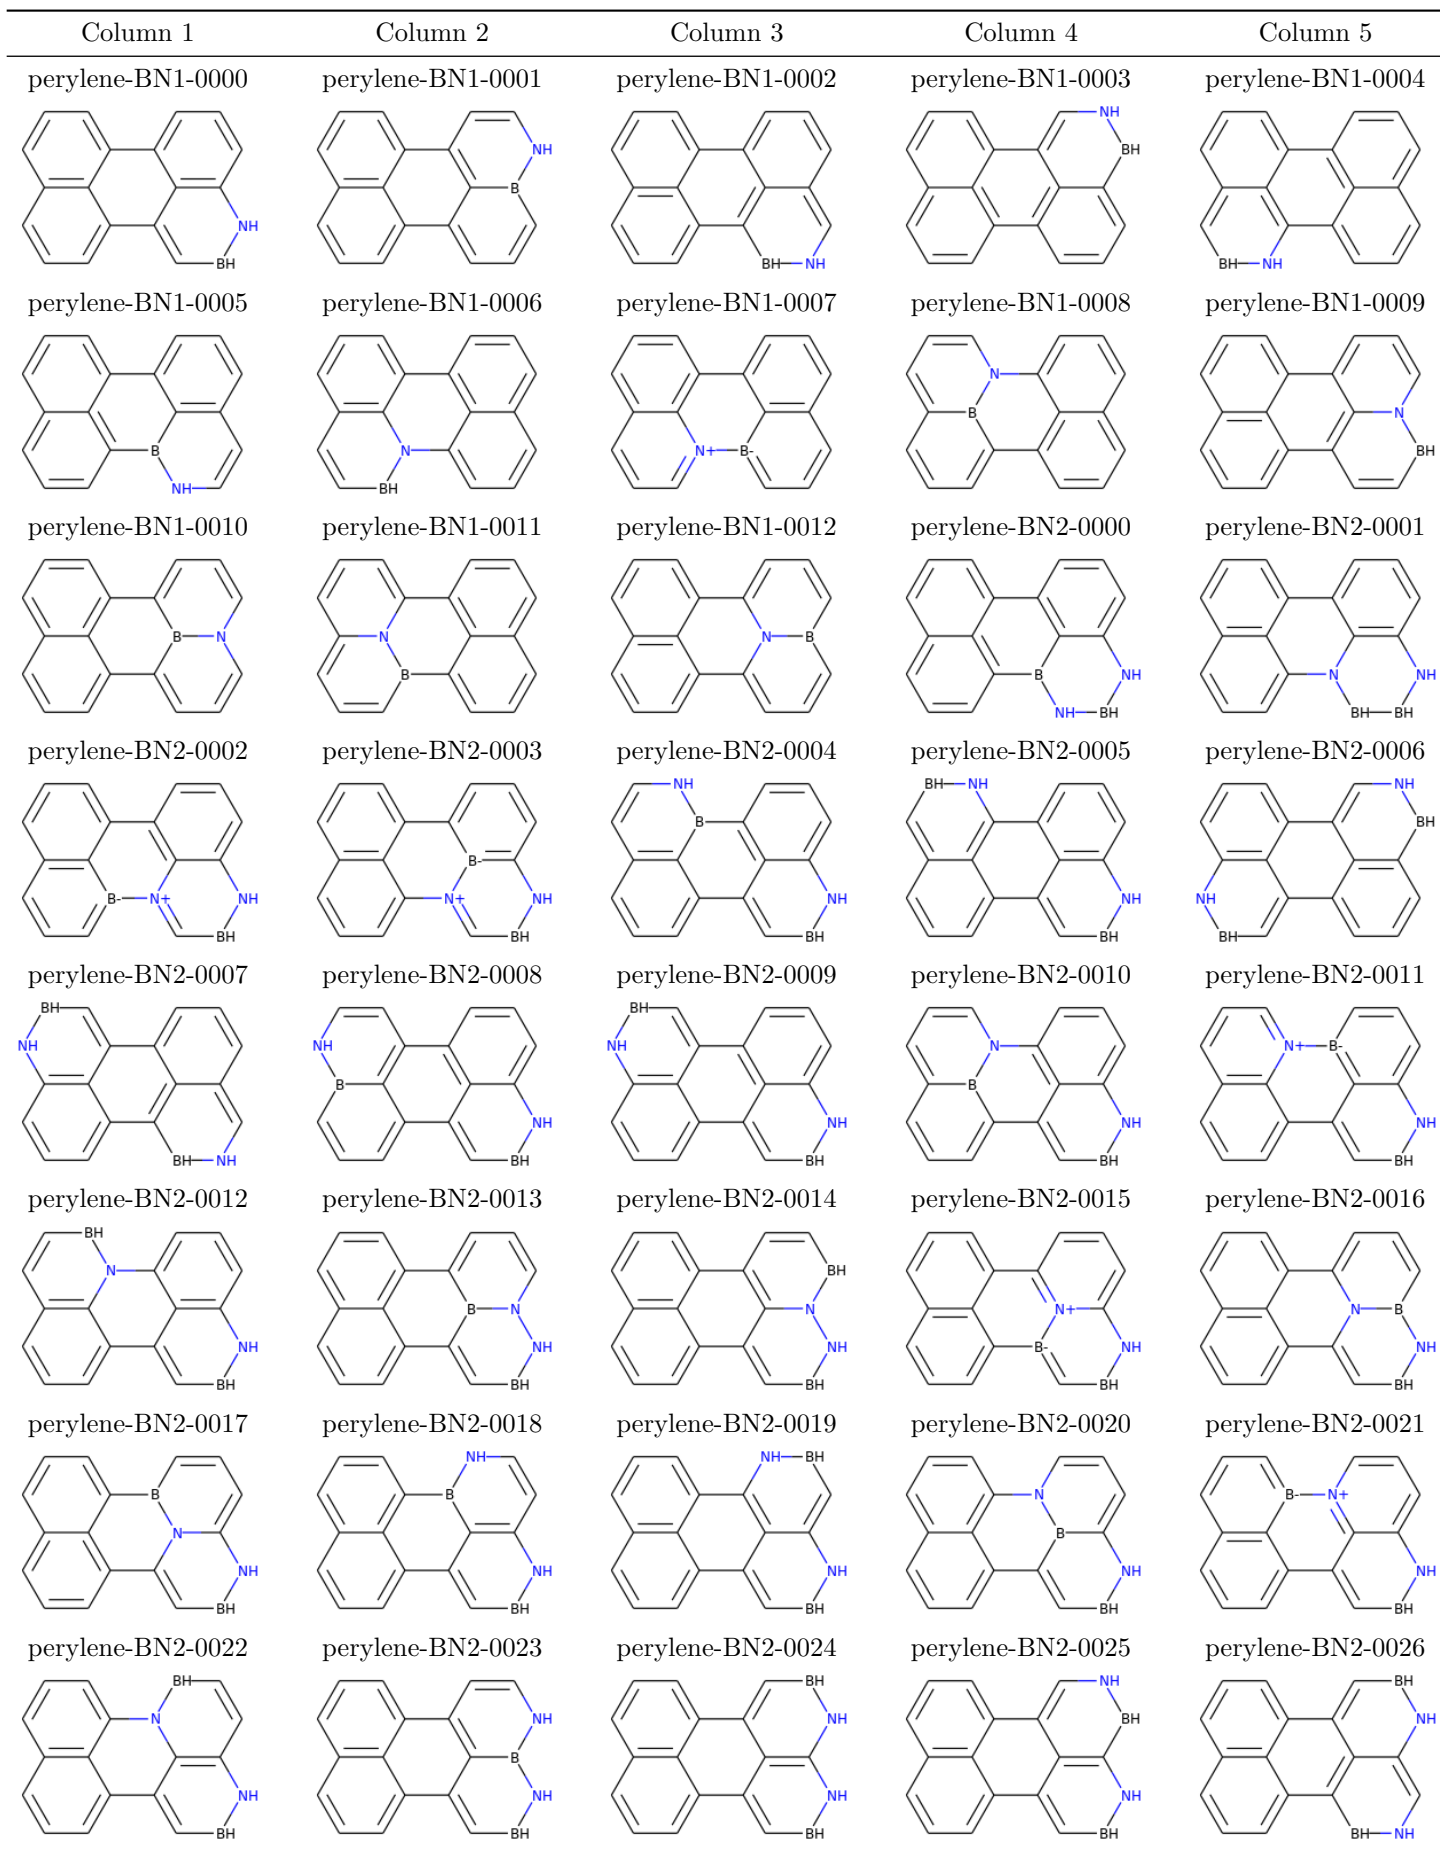

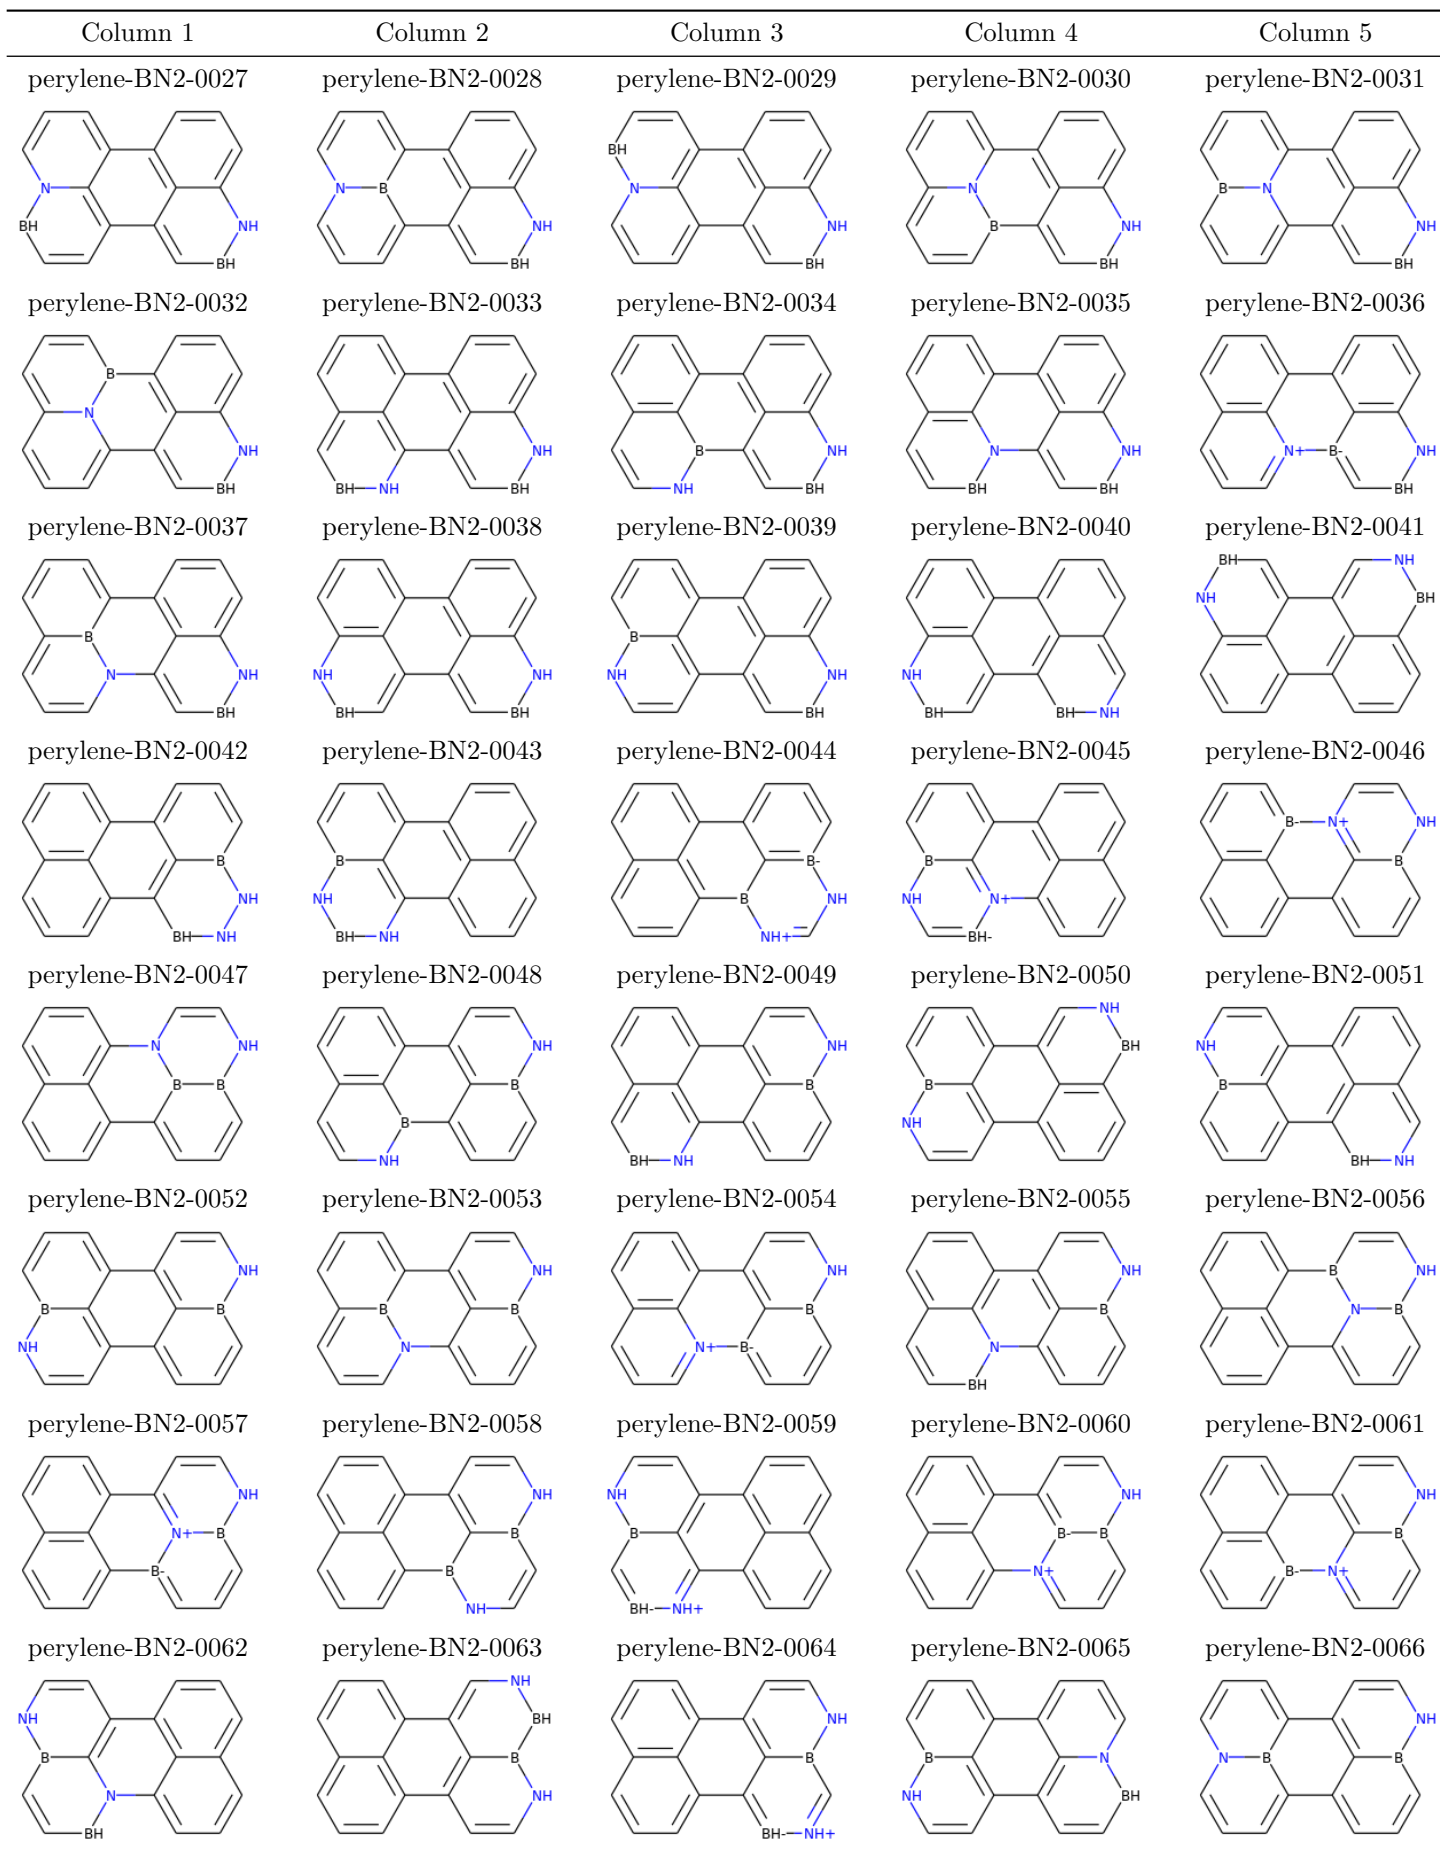

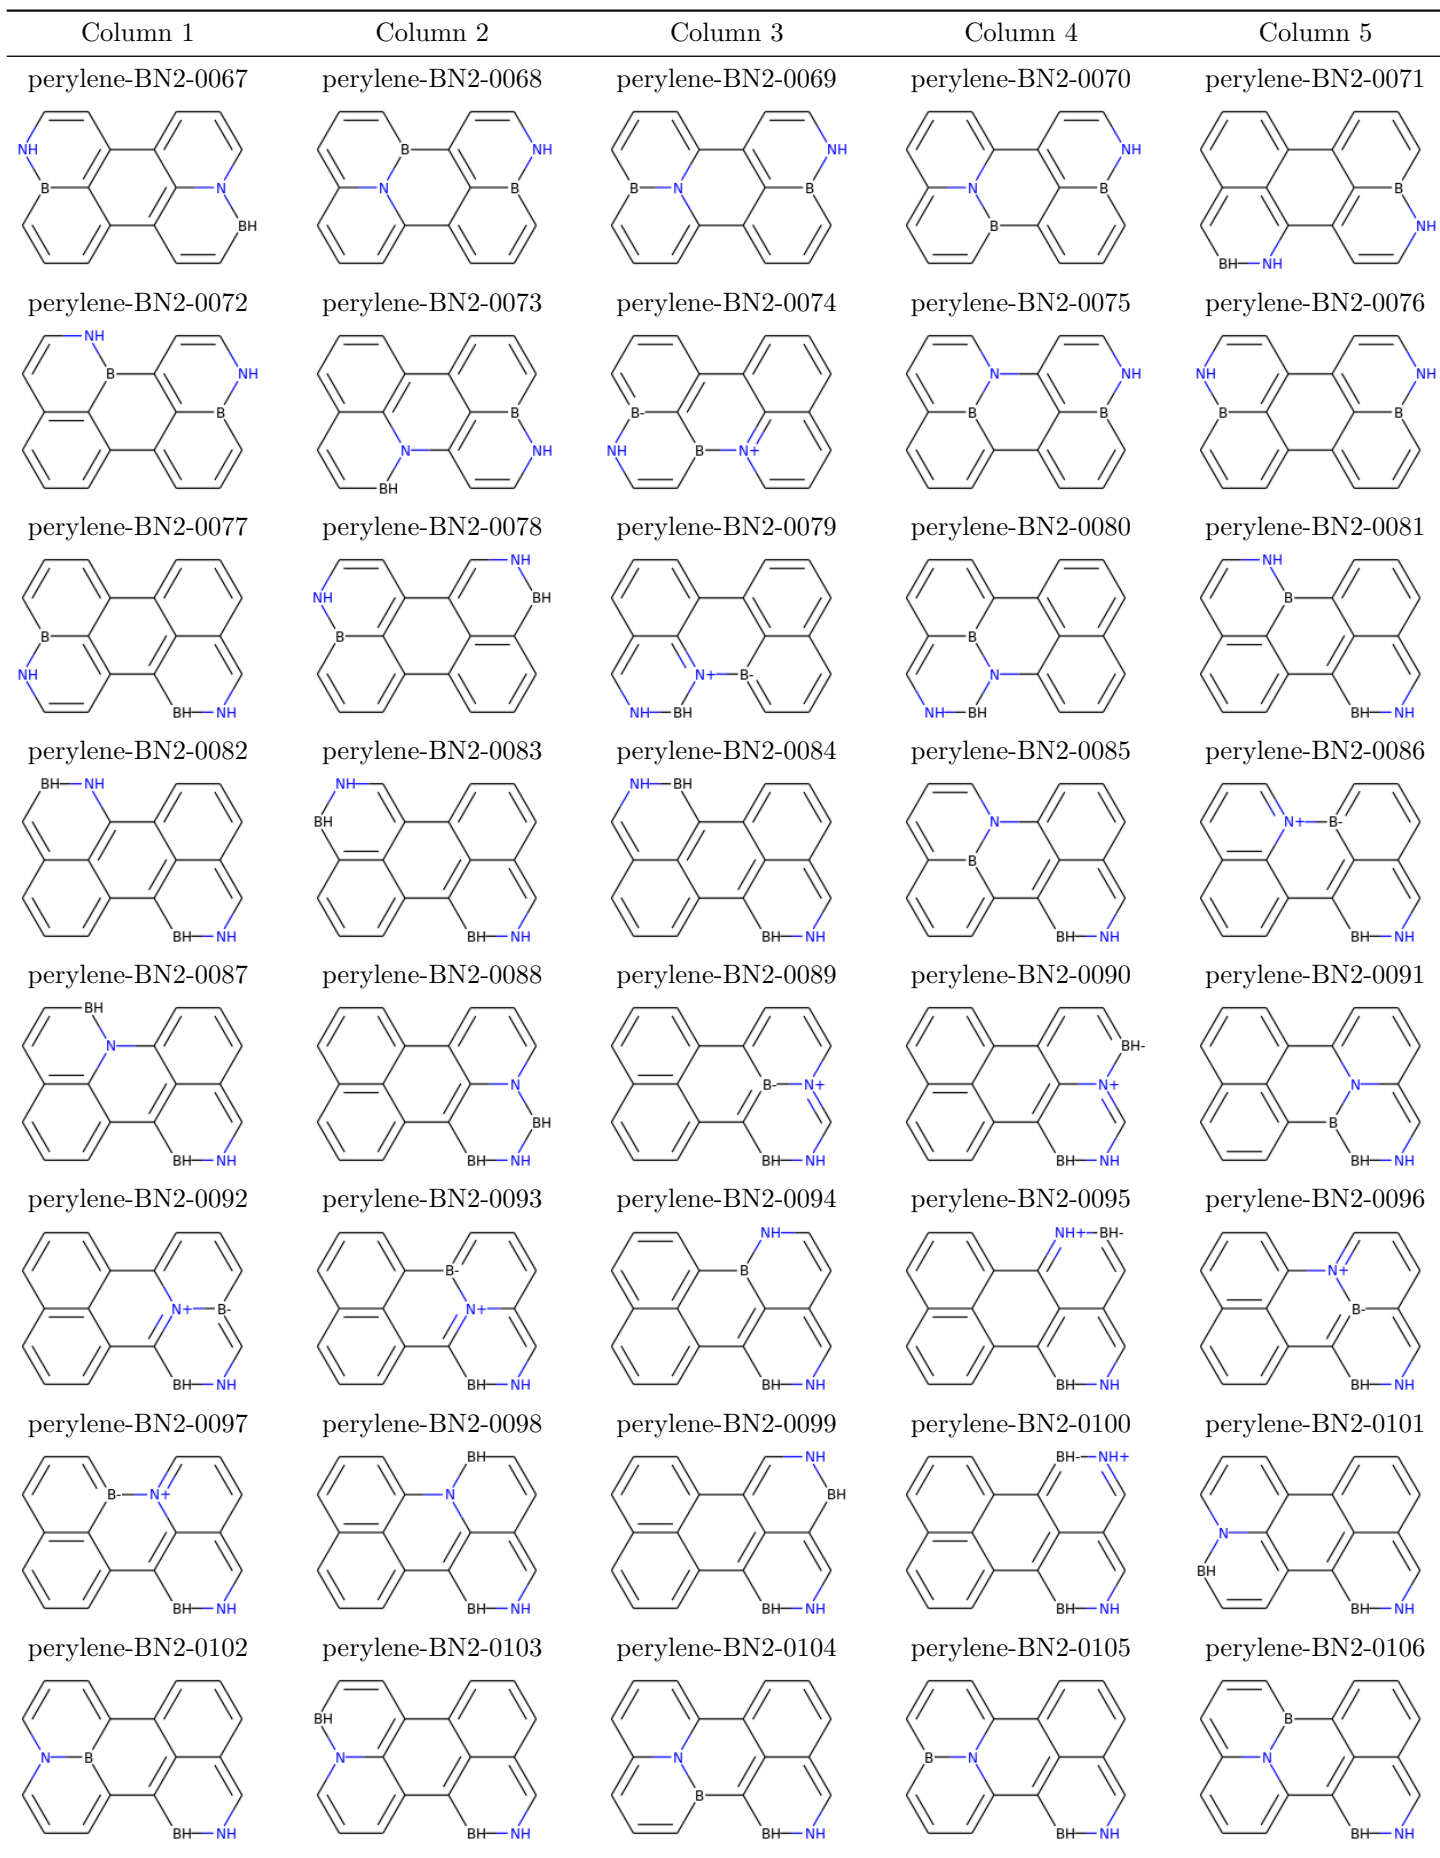

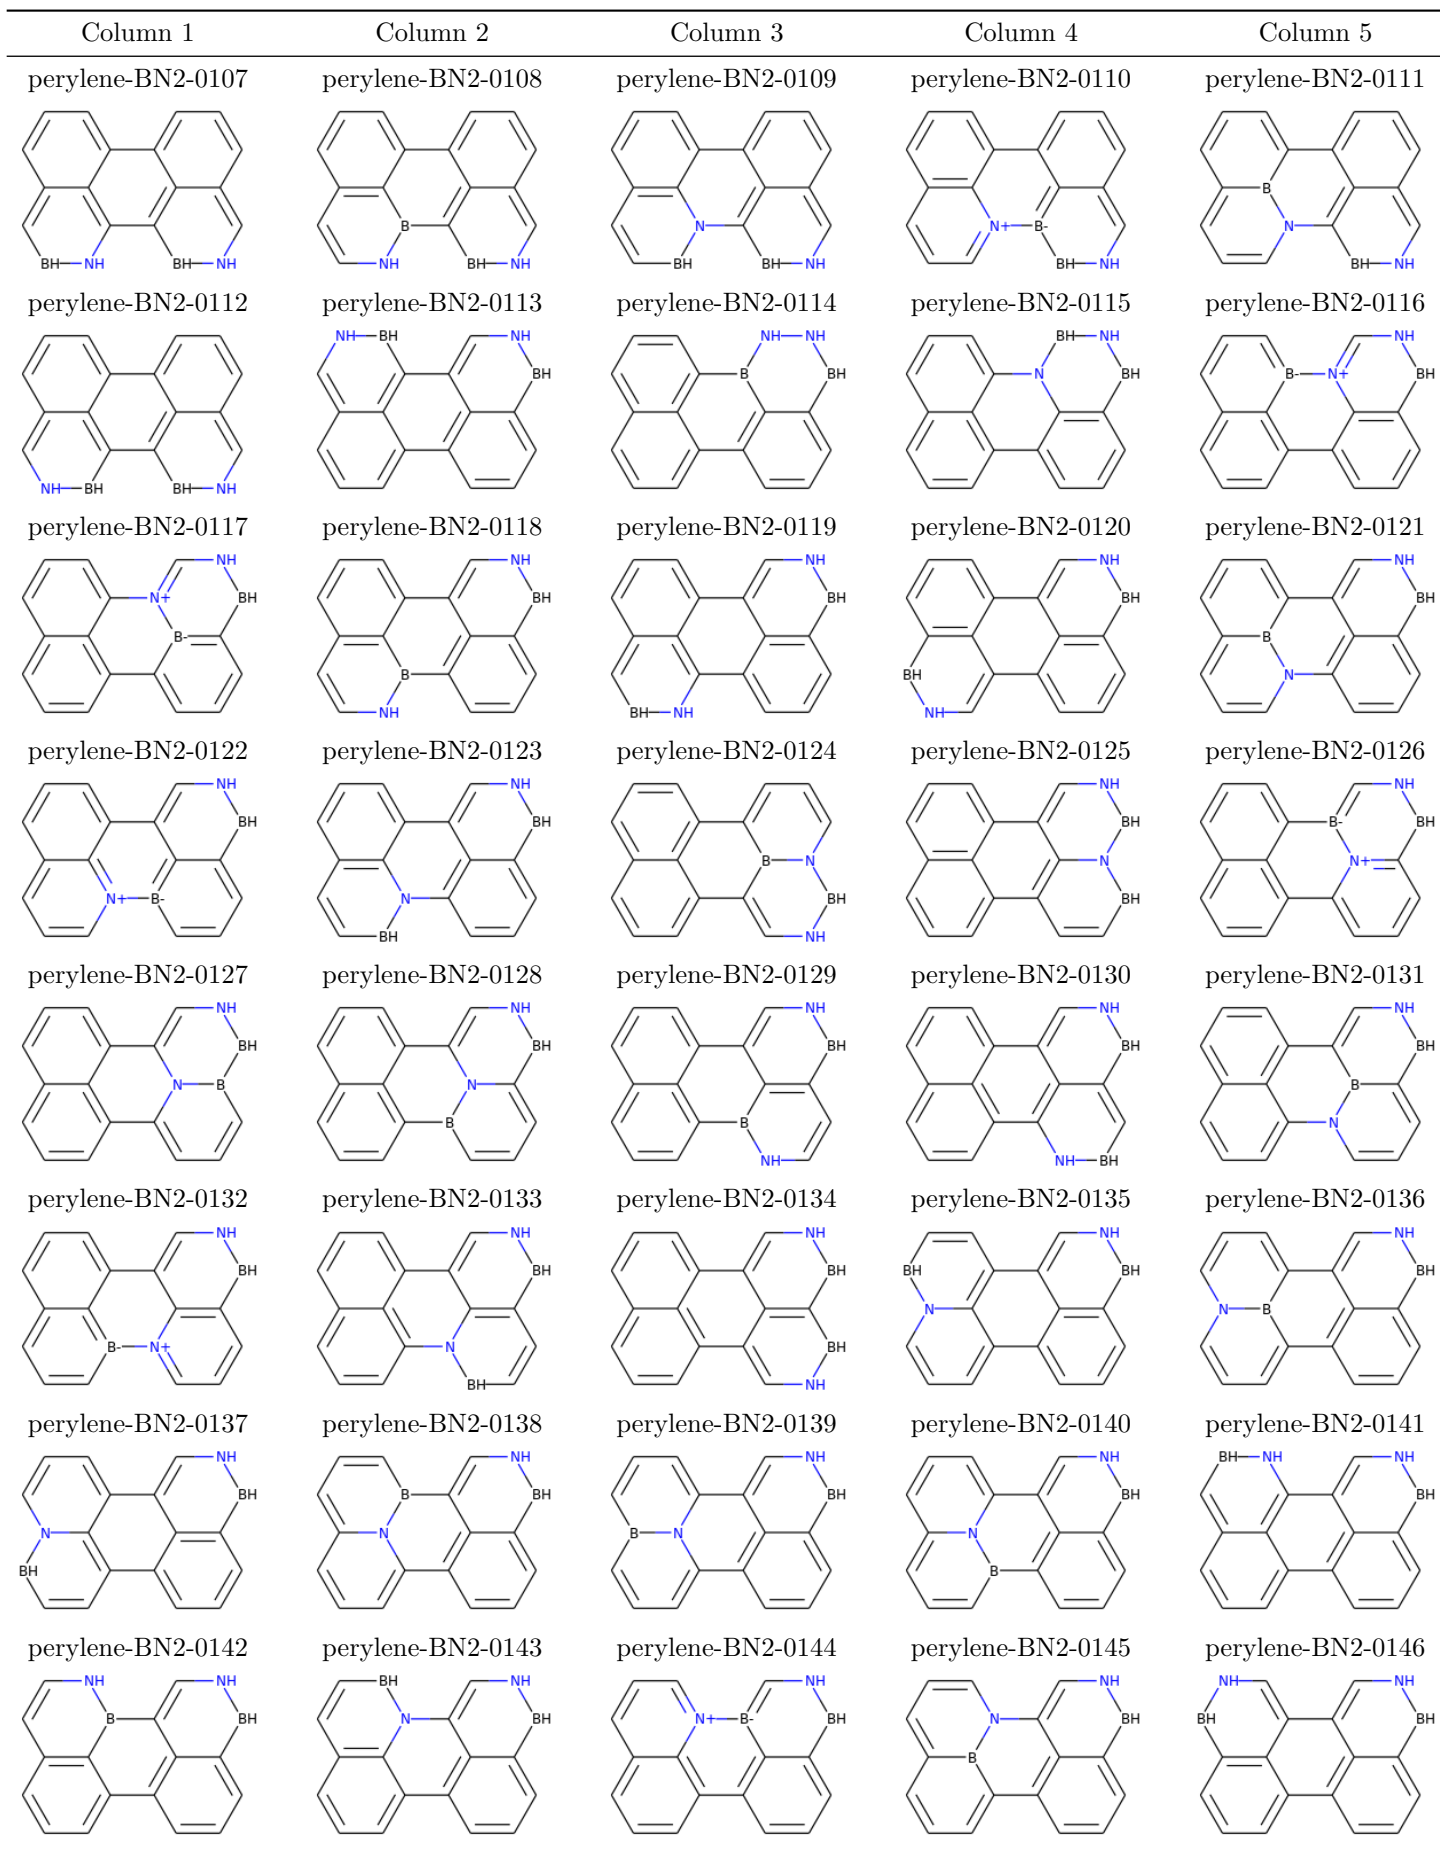

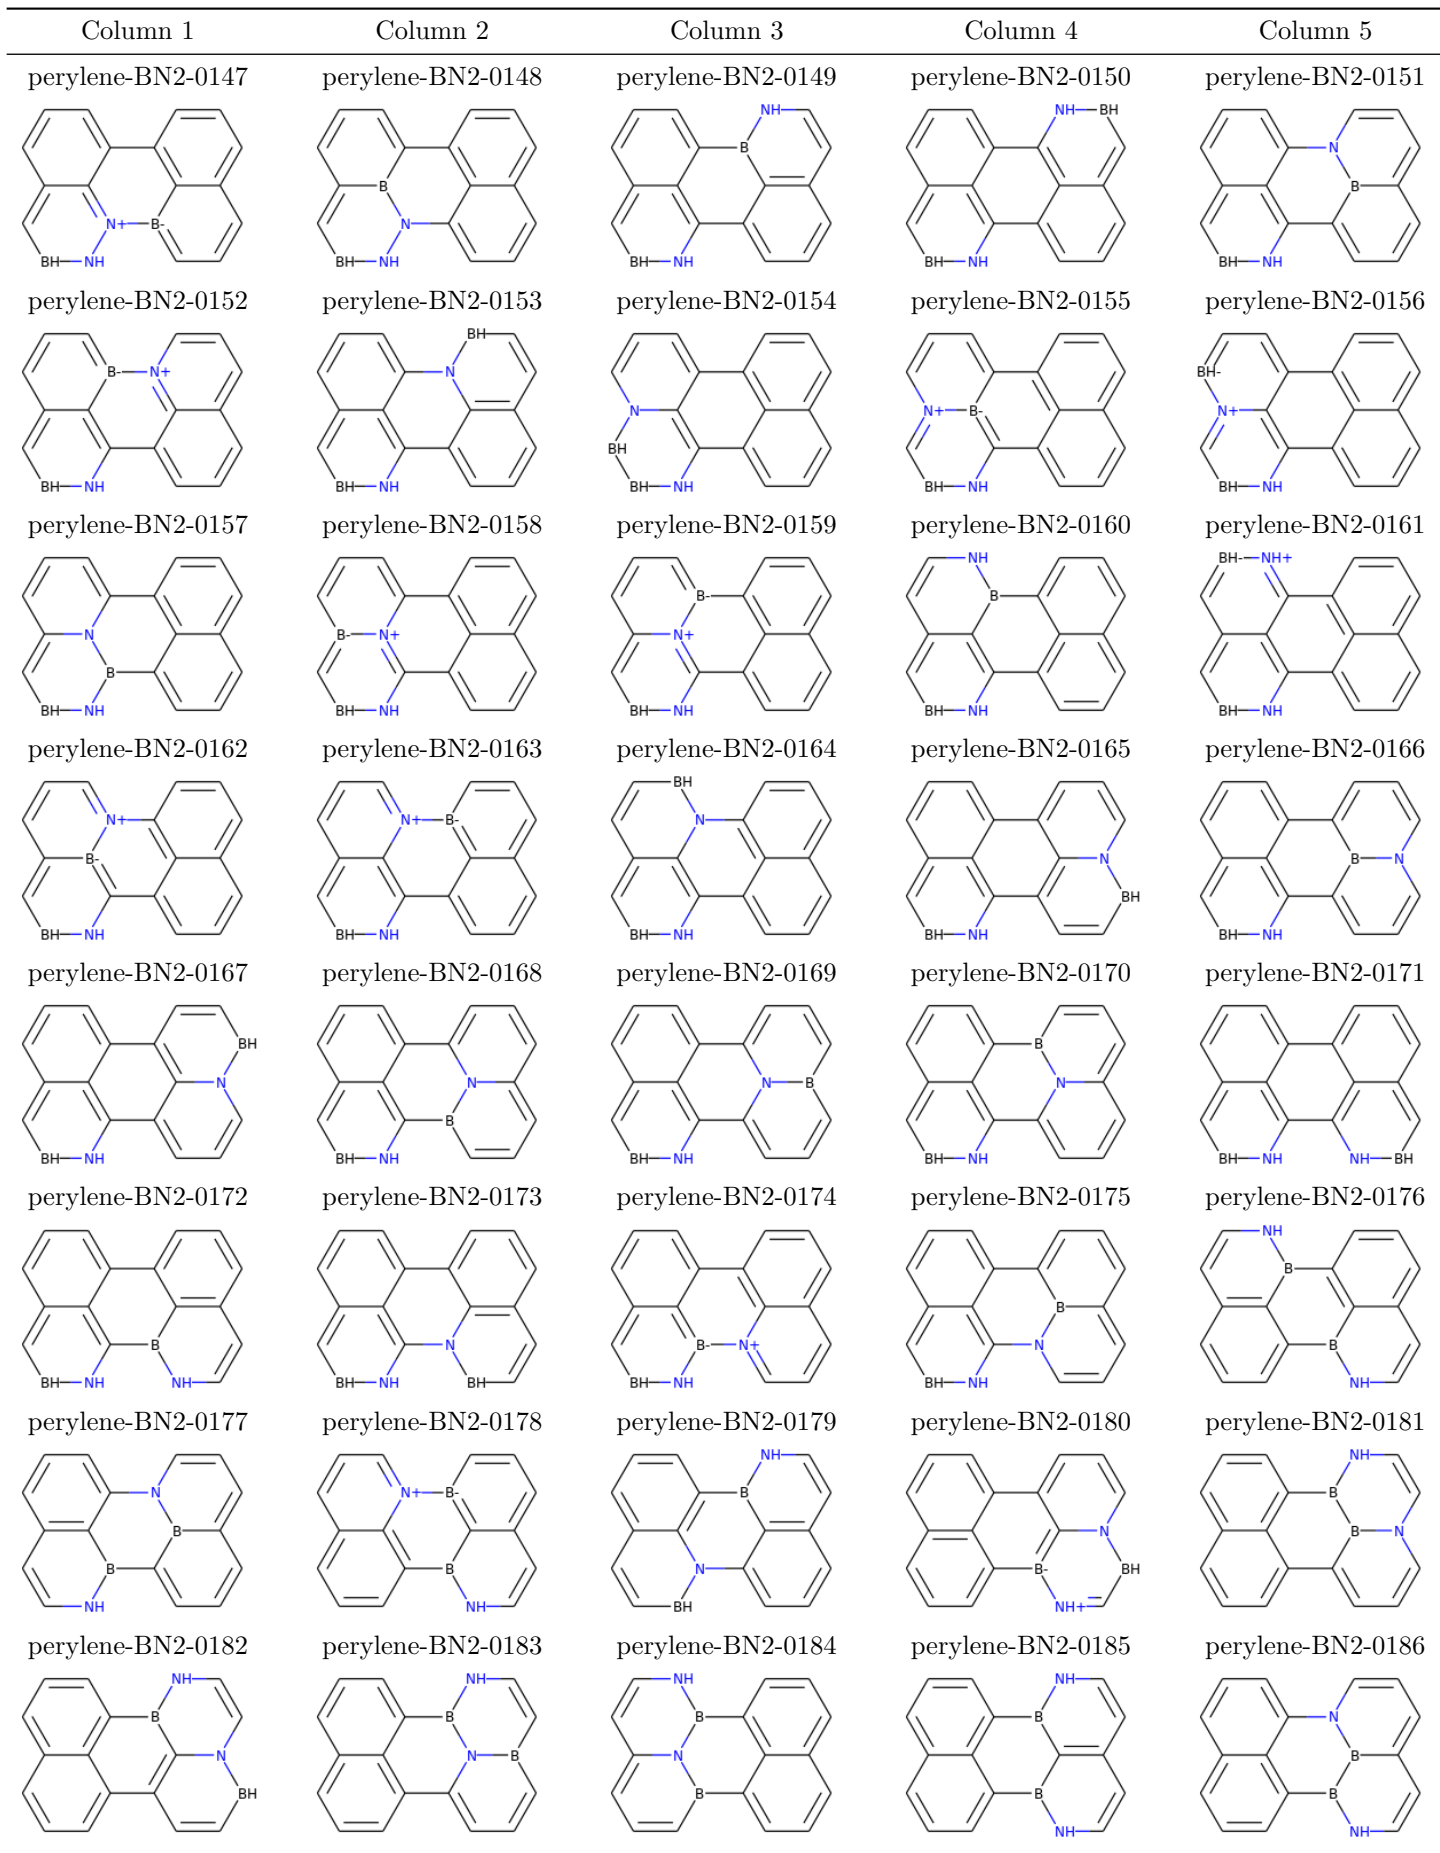

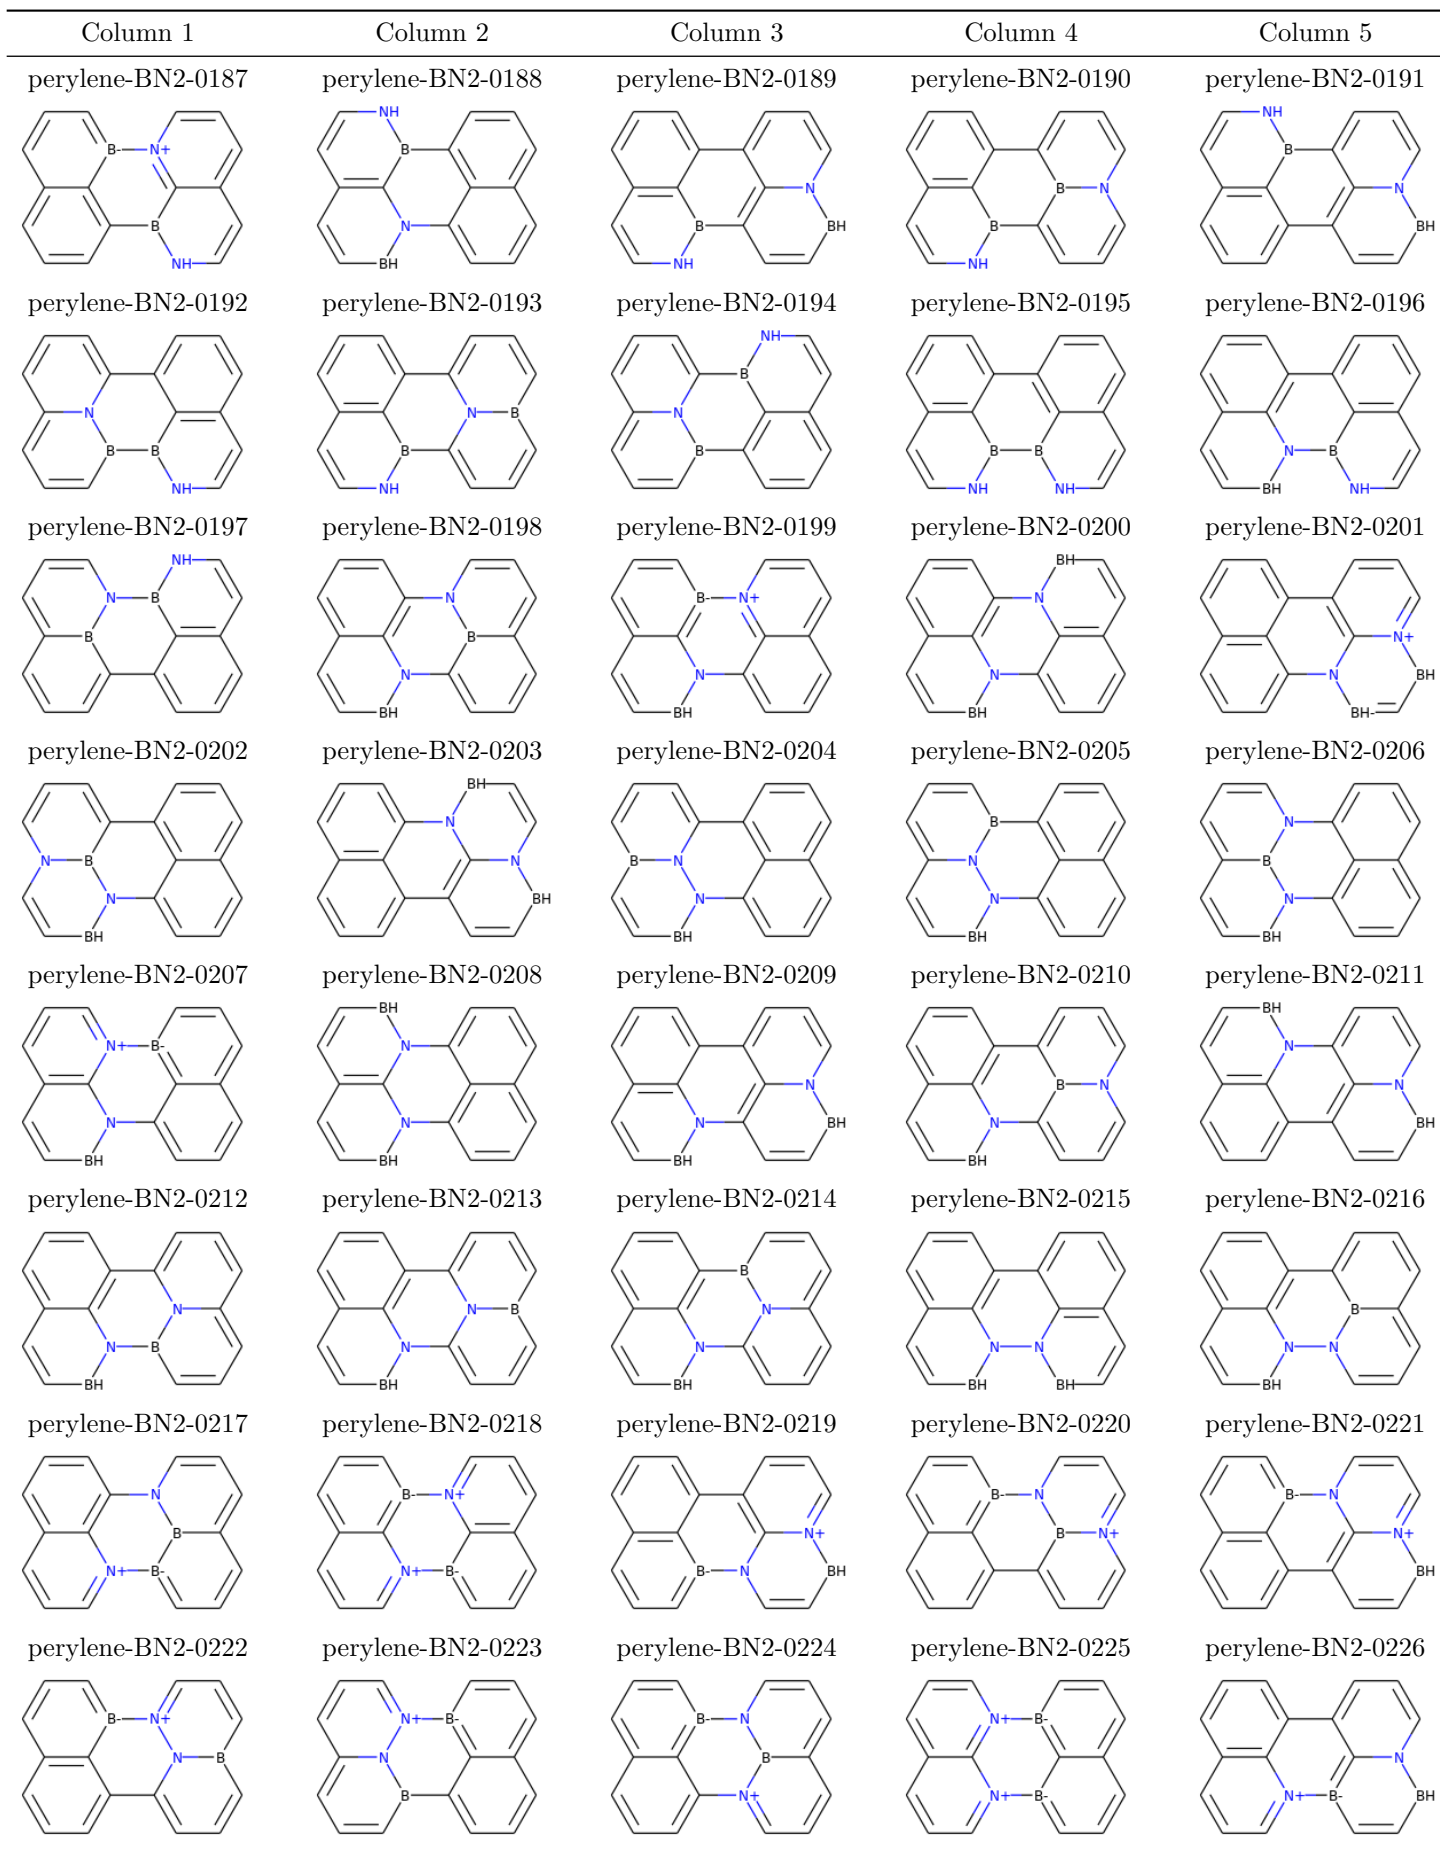

| Column 1              | Column 2              | Column 3              | Column 4              | Column 5              |
|-----------------------|-----------------------|-----------------------|-----------------------|-----------------------|
| perylene-BN2-0227<br> | perylene-BN2-0228<br> | perylene-BN2-0229<br> | perylene-BN2-0230<br> | perylene-BN2-0231<br> |
| perylene-BN2-0232<br> | perylene-BN2-0233<br> | perylene-BN2-0234<br> | perylene-BN2-0235<br> | perylene-BN2-0236<br> |
| perylene-BN2-0237<br> | perylene-BN2-0238<br> | perylene-BN2-0239<br> | perylene-BN2-0240<br> | perylene-BN2-0241<br> |
| perylene-BN2-0242<br> | perylene-BN2-0243<br> | perylene-BN2-0244<br> | perylene-BN2-0245<br> | perylene-BN2-0246<br> |
| perylene-BN2-0247<br> | perylene-BN2-0248<br> | perylene-BN2-0249<br> | perylene-BN2-0250<br> | perylene-BN2-0251<br> |
| perylene-BN2-0252<br> | perylene-BN2-0253<br> | perylene-BN2-0254<br> | perylene-BN2-0255<br> | perylene-undoped<br>  |

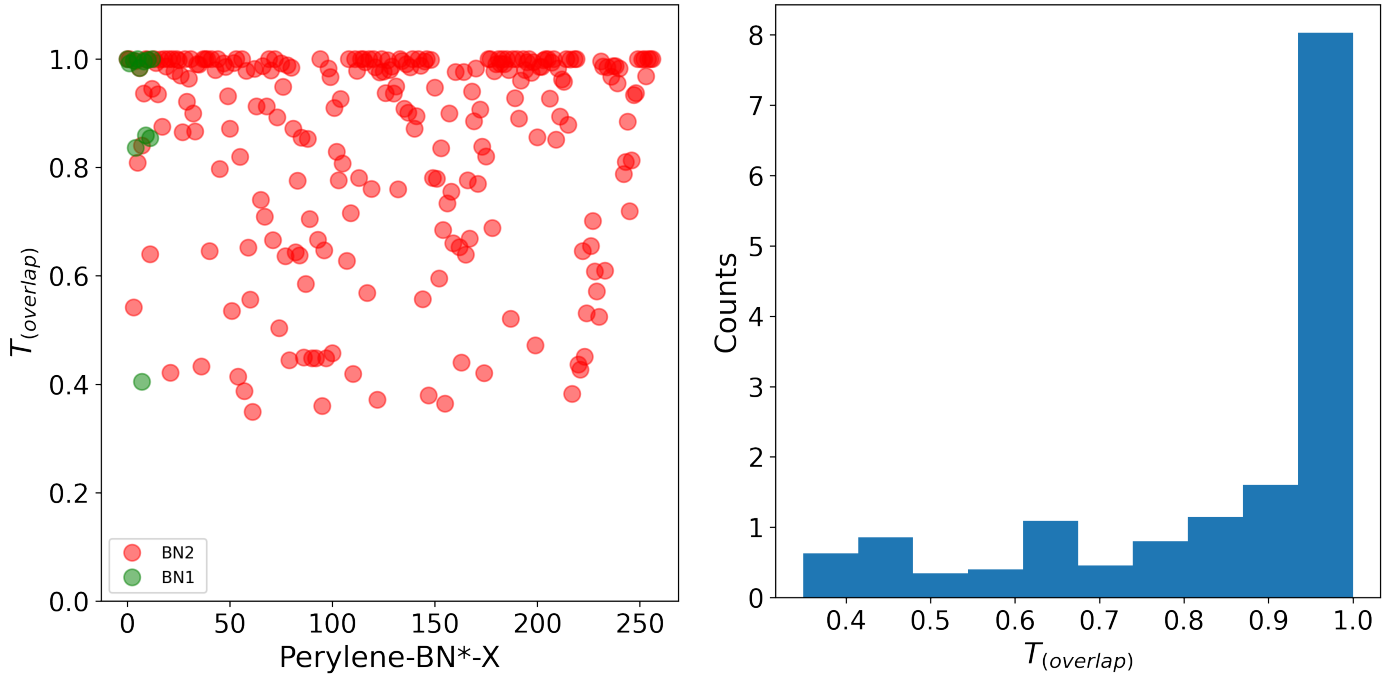

Fig. 4 (a) Maximum ( $T_{(overlap)}$ ) of BN doped and undoped perylene molecule, (b) Histogram of distribution of  $\text{Max}(T_{(overlap)})$

### 3 Appendix: Effect of Derivative on density matrix

The  $|T_{RP}|_{NAC}^2$  is calculated by using jacobian vector product of singlet exciton wave function  $|S^*\rangle$  and biexciton wave function  $|TT^*\rangle$ . It is drastically influenced by various geometrical factors primarily bond distance, bond strength, stacking distance. For an optimal geometry the density matrix does not change for slight change in geometry therefore it's derivative is zero. While performing rigid scan the geometry of dimer is not optimal through out the scan. This effects value of  $|T_{RP}|_{NAC}^2$ . We addressed the effect of derivative on density matrix (DDM) on  $|T_{RP}|_{NAC}^2$  and stacking position in this section. Scan of  $|T_{RP}|_{NAC}^2$  is done with (i) ignoring the DDM ( $T_{(i)}$ ) and (ii) considering DDM ( $T_{(ii)}$ ) Where the DDM is calculated using automatic differentiation<sup>1 2 3</sup>.

To study the correlation between  $T_{(i)}$  and  $T_{(ii)}$  the two  $|T_{RP}|_{NAC}^2$  scan plots are merged. In both the cases all the scan points are factorised with their respective maximum and multiplied as shown by equation 1, where subscript  $x,y$  corresponds to the stacking position. The products are plotted showing the overlap of high  $|T_{RP}|_{NAC}^2$  by both the method.

$$T_{(overlap)x,y} = \frac{T_{(i)x,y}}{\text{Max}(T_{(i)})} \times \frac{T_{(ii)x,y}}{\text{Max}(T_{(ii)})} \quad (1)$$

When both methods show same stacking position of maximum  $|T_{RP}|_{NAC}^2$ , maximum  $T_{(overlap)}$  is 1 and it is lower than 1 when  $T_{(i)}$  and  $T_{(ii)}$  differ. Maximum of  $T_{(overlap)}$  of all the molecules and their distribution are shown in figure 4. It is closed to 1 for most of the molecules. Therefore both the methods predict similar stacking position for high  $|T_{RP}|_{NAC}^2$ . In perylene  $\text{Max}(T_{(overlap)})$  is 1 so both the methods show exactly same stacking position for maximum  $|T_{RP}|_{NAC}^2$ . In BN2-150  $\text{Max}(T_{(overlap)})$  is slightly lower ie. 0.95. It is because  $T_{(ii)}$  is overestimated at fully stacked orientation. In BN2-100 has  $\text{Max}(T_{(overlap)})$  of 0.46 because the two methods show very different maxima of  $|T_{RP}|_{NAC}^2$ . Though the second local maxima of  $T_{(i)}$  is the maxima of  $T_{(ii)}$  and vice versa.

Involving derivative on density matrix gives complete picture of  $|T_{RP}|_{NAC}^2$  yet increases computation cost and causes computational failure due to lack of memory. Since, when SCF operation converges, it returns the density matrix with error  $\epsilon$ . Due to this error in density matrix, error in calculation of  $|T_{RP}|_{NAC}^2$  is induced. Thus highly converged density matrix is needed which adds in computational cost.



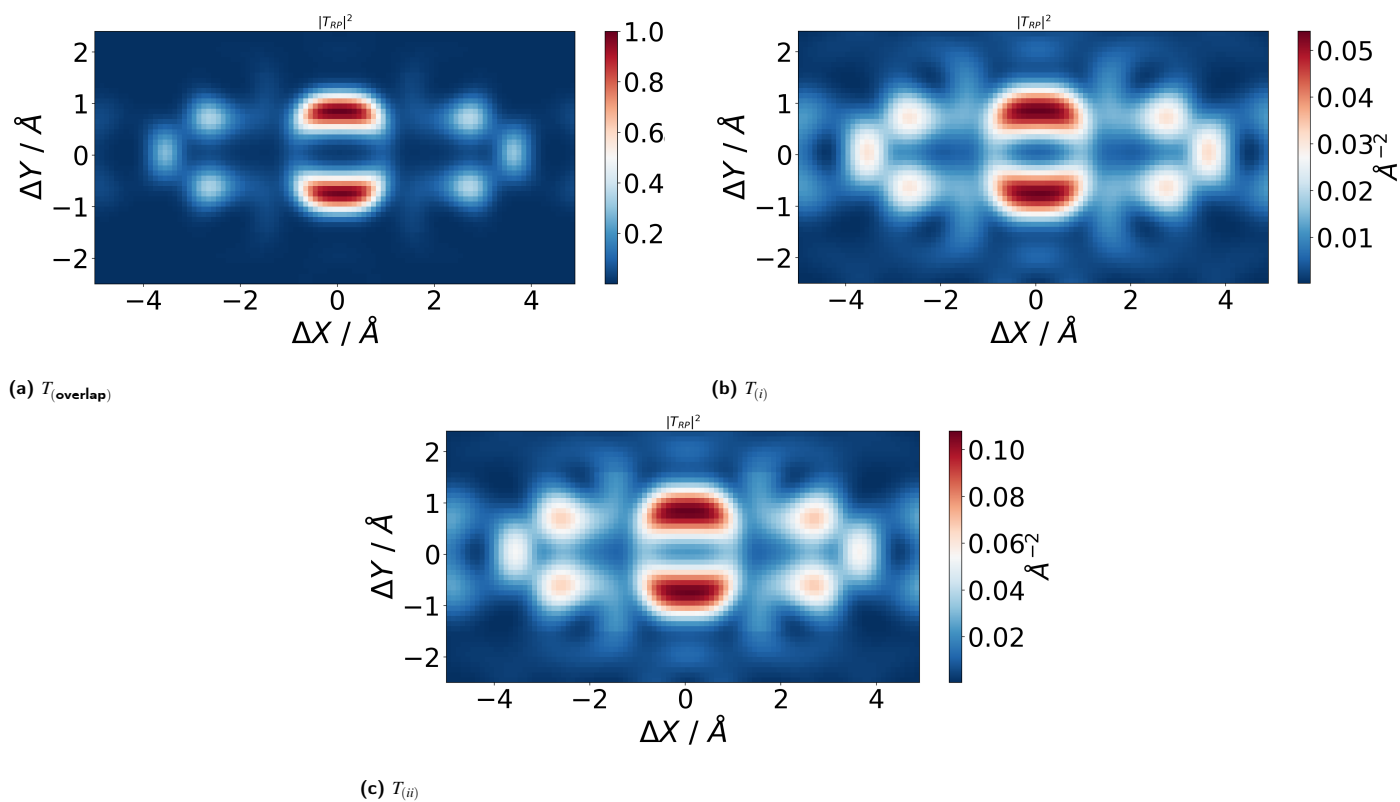

Fig. 5 Perylene Undoped

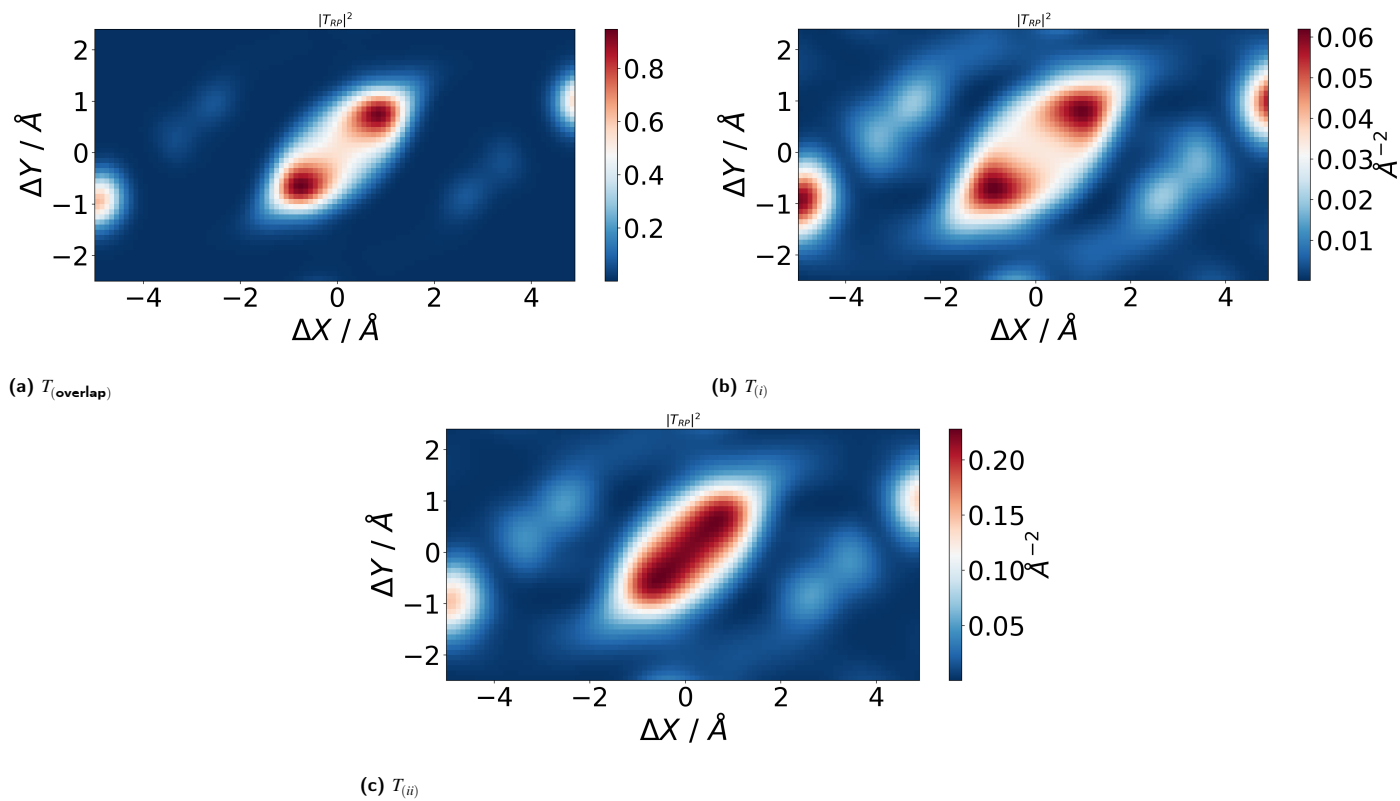

Fig. 6 BN2-150

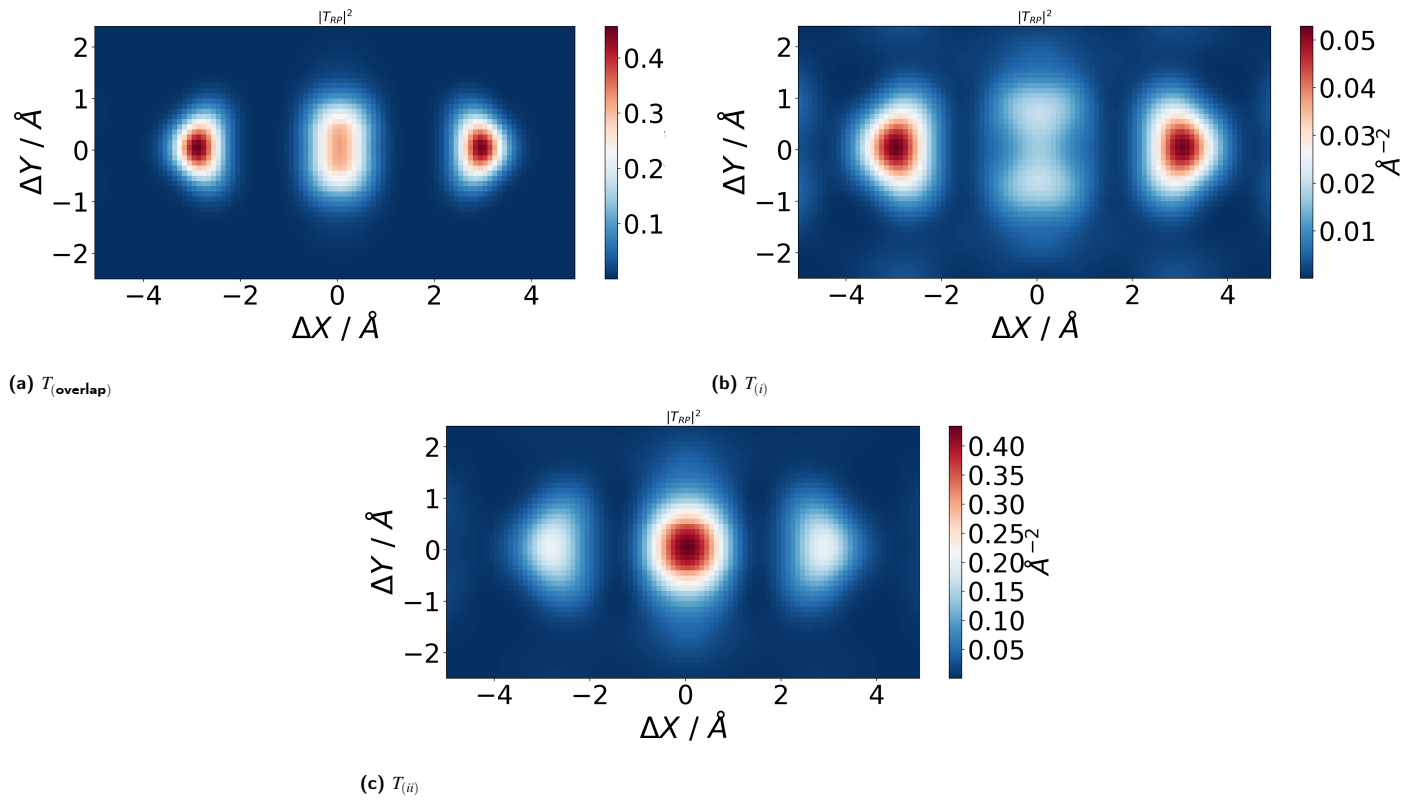

Fig. 7 BN2-100

#### 4 Appendix: Rotation of Best molecule

The Rotation along the principle axis of molecule highly affect singlet fission .<sup>4-6</sup> In the case of BN2-112 rotation did not increase the singlet fission rate. BN2-112 upon rotation ,from rotation  $0^\circ$  (Fig. 8b) to  $180^\circ$  (Fig. 9b) the stacking position of the maximum of  $|T_{RP}|^2$  changes from  $\Delta X = \pm 0.7 \text{ \AA}$  and  $\Delta Y = 0.1 \text{ \AA}$  (see Fig. 8a) to  $\Delta X = \pm 2.7 \text{ \AA}$  and  $\Delta Y = -0.9 \text{ \AA}$ (see Fig. 9a). Though the  $|T_{RP}|^2$  reduces upon rotation. Then value  $|T_{RP}|^2$  at  $\Delta X = \pm 0.7 \text{ \AA}$  and  $\Delta Y = 0.1 \text{ \AA}$  reduces drastically upon rotation from  $0^\circ$  to  $180^\circ$  where as  $|T_{RP}|^2$  at  $\Delta X = \pm 2.7 \text{ \AA}$  and  $\Delta Y = -0.9 \text{ \AA}$  varies less.

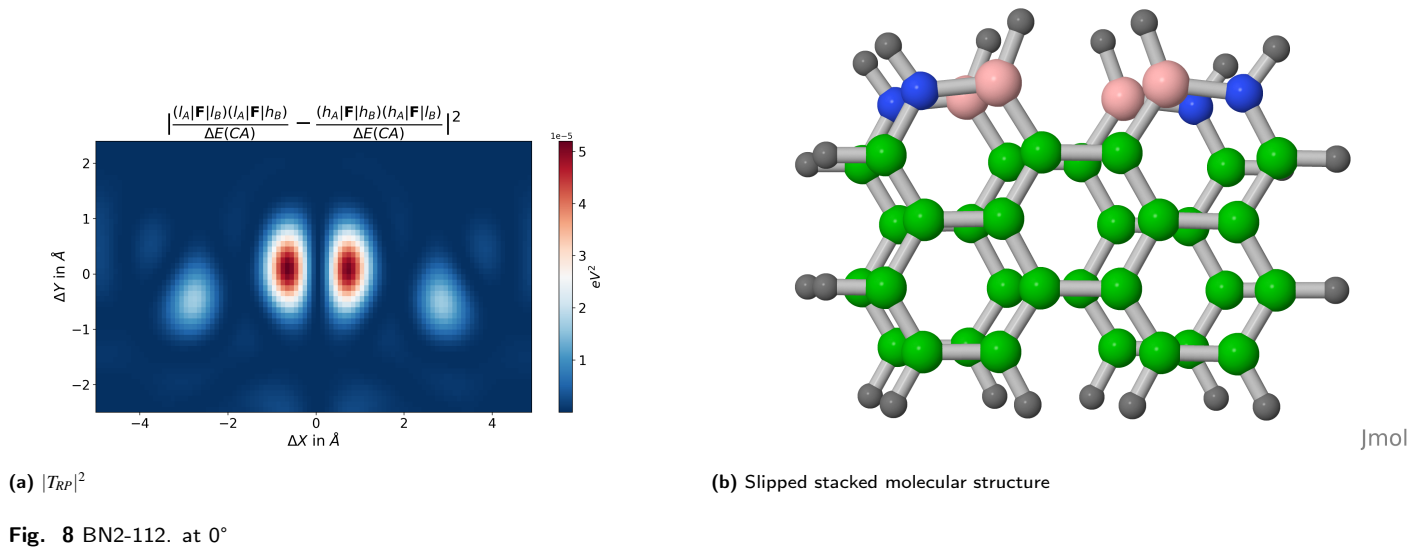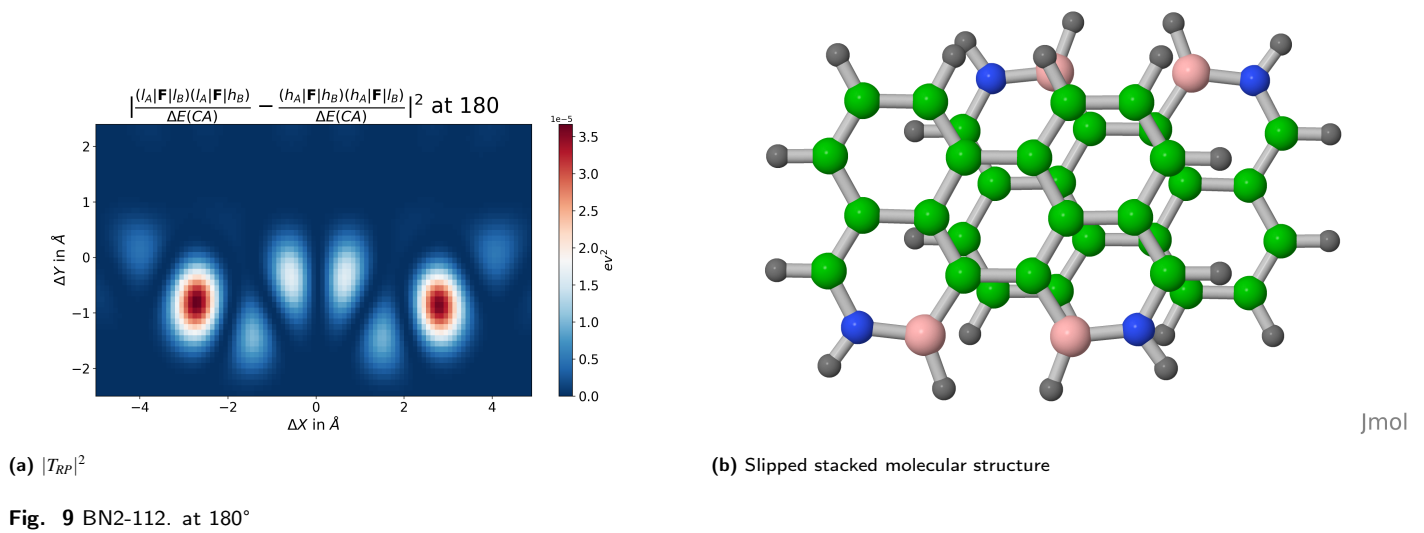

Table S2 :Maxima  $|T_{RP}|_{NAC}^2$  Ignoring derivative on density matrix(DDM), with (DDM) and their overlap

| Molecule | Without DDM |          |                                          | With DDM |          |                                          | Overlap  |          |                                          |
|----------|-------------|----------|------------------------------------------|----------|----------|------------------------------------------|----------|----------|------------------------------------------|
|          | x<br>(Å)    | y<br>(Å) | $ T_{RP} _{NAC}^2$<br>(Å <sup>-2</sup> ) | x<br>(Å) | y<br>(Å) | $ T_{RP} _{NAC}^2$<br>(Å <sup>-2</sup> ) | x<br>(Å) | y<br>(Å) | $ T_{RP} _{NAC}^2$<br>(Å <sup>-2</sup> ) |
| BN1-0    | ∓0.50       | ±0.80    | 0.19                                     | ∓0.50    | ±0.80    | 0.38                                     | ∓0.50    | ±0.80    | 1.00                                     |
| BN1-1    | ∓1.30       | ∓0.90    | 0.20                                     | ∓1.20    | ∓0.90    | 0.39                                     | ∓1.20    | ∓0.90    | 0.99                                     |
| BN1-2    | ±2.70       | ±0.80    | 0.07                                     | 0.00     | 0.00     | 0.32                                     | ±0.20    | ∓0.50    | 0.80                                     |
| BN1-3    | ∓0.30       | ±0.90    | 0.13                                     | ∓0.20    | ±0.80    | 0.27                                     | ∓0.20    | ±0.80    | 1.00                                     |
| BN1-4    | ±0.70       | ±0.80    | 0.09                                     | 0.00     | 0.00     | 0.34                                     | ∓0.60    | ∓0.60    | 0.84                                     |
| BN1-5    | ∓3.60       | ±0.30    | 0.24                                     | ∓3.60    | ±0.30    | 0.48                                     | ∓3.60    | ±0.30    | 1.00                                     |
| BN1-6    | ±0.40       | ∓0.80    | 0.13                                     | ±0.40    | ∓0.70    | 0.28                                     | ±0.40    | ∓0.80    | 0.98                                     |
| BN1-7    | ±3.00       | ±0.10    | 0.12                                     | 0.00     | 0.00     | 1.04                                     | ±2.90    | ∓0.10    | 0.41                                     |
| BN1-8    | ±0.40       | ±0.70    | 0.30                                     | ±0.30    | ±0.70    | 0.68                                     | ±0.40    | ±0.70    | 1.00                                     |
| BN1-9    | 0.00        | ∓0.80    | 0.09                                     | 0.00     | ∓0.40    | 0.27                                     | 0.00     | ∓0.70    | 0.86                                     |
| BN1-10   | -0.50       | ±0.80    | 0.13                                     | -0.40    | ±0.80    | 0.27                                     | ∓0.40    | ±0.80    | 1.00                                     |
| BN1-11   | ±3.60       | ±0.10    | 0.10                                     | 0.00     | 0.50     | 0.29                                     | 0.00     | ±0.50    | 0.85                                     |
| BN1-12   | -0.50       | ±0.80    | 0.18                                     | -0.50    | ±0.80    | 0.36                                     | -0.50    | ±0.80    | 1.00                                     |
| BN2-0    | ±1.70       | ±1.10    | 0.33                                     | ±1.70    | ±1.10    | 0.65                                     | ±1.70    | ±1.10    | 1.00                                     |
| BN2-1    | ±0.20       | ∓0.80    | 0.18                                     | ±0.20    | ∓0.80    | 0.36                                     | ±0.20    | ∓0.80    | 1.00                                     |
| BN2-2    | ±3.20       | ∓0.20    | 0.54                                     | ±3.20    | ∓0.10    | 1.67                                     | ±3.20    | ∓0.20    | 0.99                                     |
| BN2-3    | ±2.10       | ±0.80    | 0.41                                     | 0.00     | 0.00     | 3.98                                     | ±0.80    | ±0.10    | 0.54                                     |
| BN2-4    | ∓2.80       | ∓0.80    | 0.27                                     | ∓2.80    | ±0.70    | 0.55                                     | ±2.80    | ±0.70    | 1.00                                     |
| BN2-5    | ∓0.80       | ∓0.70    | 0.12                                     | 0.00     | 0.00     | 0.46                                     | ∓0.60    | ∓0.60    | 0.81                                     |
| BN2-6    | ±0.70       | ∓1.00    | 0.17                                     | ±0.60    | ∓0.90    | 0.31                                     | ±0.60    | ∓1.00    | 0.98                                     |
| BN2-7    | ±0.50       | ∓0.70    | 0.10                                     | 0.00     | 0.00     | 0.43                                     | ±0.40    | ∓0.60    | 0.84                                     |
| BN2-8    | ±1.20       | ±0.80    | 0.29                                     | ±0.50    | ∓0.40    | 0.61                                     | ±1.20    | ±0.80    | 0.94                                     |
| BN2-9    | ∓1.00       | ±0.90    | 0.68                                     | ∓1.00    | ±0.90    | 1.17                                     | ∓1.00    | ±0.90    | 1.00                                     |
| BN2-10   | ∓1.50       | ±0.90    | 1.29                                     | ±1.50    | ∓0.90    | 2.82                                     | ∓1.50    | ±0.90    | 1.00                                     |
| BN2-11   | ∓2.80       | ±0.50    | 0.16                                     | 0.00     | 0.00     | 0.74                                     | ∓2.80    | ±0.50    | 0.64                                     |
| BN2-12   | ∓1.20       | ±0.70    | 0.22                                     | ∓0.80    | ±0.70    | 0.43                                     | ∓1.10    | ±0.70    | 0.94                                     |
| BN2-13   | 0.00        | ∓0.80    | 0.20                                     | 0.00     | ∓0.80    | 0.38                                     | 0.00     | ∓0.80    | 1.00                                     |
| BN2-14   | ∓0.30       | ±0.90    | 0.12                                     | ∓0.30    | ±0.80    | 0.26                                     | ∓0.30    | ±0.90    | 0.99                                     |
| BN2-15   | ±0.70       | ±0.90    | 0.12                                     | ±0.70    | ∓0.10    | 0.45                                     | ±0.90    | ∓0.10    | 0.93                                     |
| BN2-16   | ∓0.50       | ±0.70    | 0.19                                     | ∓0.40    | ±0.70    | 0.37                                     | ∓0.50    | ±0.70    | 1.00                                     |
| BN2-17   | ±3.80       | ∓0.20    | 0.11                                     | 0.40     | 0.40     | 0.26                                     | 3.80     | ∓0.20    | 0.87                                     |
| BN2-18   | ∓0.20       | ±0.80    | 0.22                                     | ∓0.30    | ±0.80    | 0.42                                     | ∓0.20    | ±0.80    | 1.00                                     |
| BN2-19   | ∓0.70       | ±0.80    | 0.12                                     | ∓0.50    | ±0.70    | 0.29                                     | ∓0.60    | ±0.80    | 0.99                                     |
| BN2-20   | ∓2.20       | ∓1.00    | 1.68                                     | ∓2.20    | ∓1.00    | 4.15                                     | ∓2.20    | ∓1.00    | 1.00                                     |
| BN2-21   | ∓3.00       | ±0.30    | 0.18                                     | 0.00     | 0.00     | 1.27                                     | ∓3.00    | ±0.30    | 0.42                                     |
| BN2-22   | ∓1.50       | ∓0.60    | 0.44                                     | ∓1.50    | ∓0.60    | 0.84                                     | ∓1.50    | ∓0.60    | 1.00                                     |
| BN2-23   | ∓0.70       | ∓0.60    | 0.20                                     | ∓0.60    | ∓0.50    | 0.47                                     | ∓0.70    | ∓0.50    | 0.98                                     |
| BN2-24   | ±0.70       | -0.80    | 1.80                                     | ±0.70    | -0.80    | 3.69                                     | ±0.70    | -0.80    | 1.00                                     |
| BN2-25   | ∓0.10       | ∓0.80    | 0.18                                     | ∓0.20    | ∓0.80    | 0.33                                     | ∓0.20    | ∓0.80    | 1.00                                     |
| BN2-26   | ±0.40       | ±0.60    | 0.13                                     | 0.30     | ±0.40    | 0.34                                     | ±0.40    | ±0.50    | 0.97                                     |
| BN2-27   | ∓0.20       | ±0.90    | 0.12                                     | 0.00     | 0.10     | 0.39                                     | -0.10    | ±0.70    | 0.86                                     |
| BN2-28   | ∓0.80       | ±0.80    | 0.50                                     | ∓0.80    | ±0.80    | 1.08                                     | ∓0.80    | ±0.80    | 1.00                                     |
| BN2-29   | ∓0.10       | ±0.70    | 0.13                                     | 0.00     | ±0.10    | 0.41                                     | ∓0.10    | ±0.60    | 0.92                                     |
| BN2-30   | ∓0.10       | ±0.70    | 0.15                                     | ∓0.10    | ±0.50    | 0.42                                     | ∓0.10    | ±0.60    | 0.96                                     |
| BN2-31   | ±0.80       | ∓1.00    | 0.62                                     | ±0.80    | ∓1.00    | 1.29                                     | ±0.80    | ∓1.00    | 1.00                                     |
| BN2-32   | 0.00        | ∓0.70    | 0.14                                     | 0.00     | ∓0.10    | 0.46                                     | 0.00     | ∓0.60    | 0.90                                     |
| BN2-33   | ∓0.90       | ±0.80    | 0.13                                     | 0.00     | 0.00     | 0.45                                     | ∓0.70    | ±0.70    | 0.87                                     |

| Molecule | Without DDM |          |                                          | With DDM |          |                                          | Overlap  |          |                                          |
|----------|-------------|----------|------------------------------------------|----------|----------|------------------------------------------|----------|----------|------------------------------------------|
|          | x<br>(Å)    | y<br>(Å) | $ T_{RP} _{NAC}^2$<br>(Å <sup>-2</sup> ) | x<br>(Å) | y<br>(Å) | $ T_{RP} _{NAC}^2$<br>(Å <sup>-2</sup> ) | x<br>(Å) | y<br>(Å) | $ T_{RP} _{NAC}^2$<br>(Å <sup>-2</sup> ) |
| BN2-34   | ±1.50       | ±1.00    | 0.23                                     | ±0.50    | ±0.90    | 0.47                                     | ±0.50    | ±0.90    | 0.99                                     |
| BN2-35   | ±0.90       | ±0.70    | 0.21                                     | ±0.80    | ±0.60    | 0.43                                     | ±0.80    | ±0.60    | 0.99                                     |
| BN2-36   | ±2.90       | ±0.30    | 0.24                                     | 0.00     | -0.10    | 1.52                                     | 0.00     | -0.10    | 0.43                                     |
| BN2-37   | ±0.40       | ±0.70    | 0.65                                     | ±0.40    | ±0.70    | 1.53                                     | ±0.40    | ±0.70    | 1.00                                     |
| BN2-38   | ±0.60       | 0.80     | 0.49                                     | ±0.60    | 0.80     | 0.82                                     | ±0.60    | 0.80     | 1.00                                     |
| BN2-39   | ±1.40       | ±0.90    | 0.41                                     | ±1.40    | ±0.90    | 0.74                                     | ±1.40    | ±0.90    | 1.00                                     |
| BN2-40   | ±2.80       | ±0.80    | 0.13                                     | 0.00     | 0.00     | 0.49                                     | ±0.20    | ±0.60    | 0.65                                     |
| BN2-41   | ±0.30       | ±0.80    | 0.20                                     | ±0.40    | ±0.80    | 0.39                                     | ±0.30    | ±0.80    | 1.00                                     |
| BN2-42   | ±1.00       | ±0.80    | 0.14                                     | ±0.70    | ±0.90    | 0.31                                     | ±0.90    | ±0.80    | 0.97                                     |
| BN2-43   | ±1.40       | ±0.80    | 0.20                                     | ±1.30    | ±0.90    | 0.40                                     | ±1.30    | ±0.90    | 0.98                                     |
| BN2-44   | ±1.20       | ±0.60    | 0.58                                     | ±1.20    | ±0.60    | 1.14                                     | ±1.20    | ±0.60    | 1.00                                     |
| BN2-45   | ±0.80       | ±0.30    | 0.30                                     | 0.00     | 0.00     | 3.26                                     | ±0.70    | ±0.10    | 0.80                                     |
| BN2-46   | ±3.20       | ±0.40    | 0.29                                     | 0.00     | 0.00     | 3.15                                     | ±3.20    | ±0.30    | 0.37                                     |
| BN2-47   | ±0.70       | ±0.40    | 0.31                                     | ±0.60    | ±0.40    | 0.70                                     | ±0.70    | ±0.40    | 0.99                                     |
| BN2-48   | ±1.70       | ±1.00    | 0.77                                     | ±1.70    | ±1.10    | 1.62                                     | ±1.70    | ±1.10    | 0.99                                     |
| BN2-49   | ±1.10       | ±0.90    | 0.16                                     | ±0.80    | ±0.70    | 0.53                                     | ±1.00    | ±0.80    | 0.93                                     |
| BN2-50   | ±1.10       | ±0.70    | 0.18                                     | ±0.20    | ±0.60    | 0.36                                     | ±0.20    | ±0.70    | 0.87                                     |
| BN2-51   | ±0.90       | ±0.80    | 0.11                                     | 0.00     | 0.00     | 0.49                                     | ±0.70    | ±0.80    | 0.54                                     |
| BN2-52   | ±1.50       | ±1.00    | 0.41                                     | ±1.30    | ±1.00    | 0.87                                     | ±1.40    | ±1.00    | 0.99                                     |
| BN2-53   | ±1.00       | ±0.90    | 0.61                                     | ±1.00    | ±0.90    | 1.47                                     | ±1.00    | ±0.90    | 1.00                                     |
| BN2-54   | ±2.90       | ±0.10    | 0.21                                     | 0.00     | 0.00     | 2.59                                     | ±0.20    | -0.30    | 0.41                                     |
| BN2-55   | ±0.80       | ±0.90    | 0.13                                     | 0.20     | -0.10    | 0.35                                     | ±0.70    | ±0.90    | 0.82                                     |
| BN2-56   | ±0.50       | ±0.80    | 0.14                                     | ±0.60    | ±0.80    | 0.30                                     | ±0.50    | ±0.80    | 1.00                                     |
| BN2-57   | ±3.10       | ±0.50    | 0.12                                     | 0.00     | 0.00     | 1.17                                     | ±3.00    | ±0.50    | 0.39                                     |
| BN2-58   | ±0.70       | ±0.60    | 1.67                                     | ±0.70    | ±0.50    | 3.66                                     | ±0.70    | ±0.60    | 0.98                                     |
| BN2-59   | ±0.60       | ±1.00    | 0.16                                     | 0.00     | 0.00     | 1.59                                     | -0.30    | -0.80    | 0.65                                     |
| BN2-60   | ±1.80       | ±1.20    | 0.32                                     | 0.00     | 0.00     | 8.04                                     | 0.00     | 0.00     | 0.56                                     |
| BN2-61   | ±3.00       | ±0.30    | 0.11                                     | 0.00     | 0.00     | 1.13                                     | ±2.90    | ±0.30    | 0.35                                     |
| BN2-62   | ±1.20       | ±0.70    | 0.33                                     | ±1.10    | ±0.60    | 0.72                                     | ±1.10    | ±0.70    | 0.98                                     |
| BN2-63   | ±0.60       | ±0.90    | 0.13                                     | -0.10    | ±0.20    | 0.38                                     | ±0.50    | ±0.80    | 0.91                                     |
| BN2-64   | ±1.50       | ±1.10    | 0.28                                     | 0.00     | 0.00     | 3.87                                     | 0.00     | 0.00     | 0.41                                     |
| BN2-65   | ±1.00       | ±0.50    | 0.11                                     | 0.00     | 0.00     | 0.50                                     | ±0.50    | ±0.60    | 0.74                                     |
| BN2-66   | ±1.50       | ±0.90    | 0.29                                     | ±1.50    | ±1.00    | 0.51                                     | ±1.50    | ±0.90    | 0.99                                     |
| BN2-67   | ±1.00       | ±0.80    | 0.12                                     | 0.00     | 0.00     | 0.38                                     | ±0.70    | ±0.90    | 0.71                                     |
| BN2-68   | -3.80       | ±0.30    | 0.16                                     | ±0.80    | ±0.50    | 0.43                                     | ±0.90    | ±0.80    | 0.91                                     |
| BN2-69   | ±1.10       | ±0.80    | 0.50                                     | ±1.10    | ±0.80    | 1.04                                     | ±1.10    | ±0.80    | 1.00                                     |
| BN2-70   | ±0.90       | ±0.70    | 0.17                                     | ±0.70    | ±0.60    | 0.43                                     | ±0.90    | ±0.60    | 0.98                                     |
| BN2-71   | ±2.90       | ±0.60    | 0.11                                     | 0.00     | 0.00     | 0.50                                     | -0.50    | ±0.40    | 0.67                                     |
| BN2-72   | ±1.00       | ±0.90    | 0.48                                     | ±1.00    | ±0.90    | 1.05                                     | ±1.00    | ±0.90    | 1.00                                     |
| BN2-73   | ±1.40       | ±0.80    | 0.22                                     | ±0.80    | ±0.40    | 0.49                                     | ±1.20    | ±0.70    | 0.89                                     |
| BN2-74   | ±2.80       | ±0.50    | 0.18                                     | 0.00     | 0.00     | 0.92                                     | ±2.80    | ±0.60    | 0.50                                     |
| BN2-75   | ±3.50       | ±0.50    | 0.26                                     | ±3.50    | ±0.40    | 0.56                                     | ±3.50    | ±0.40    | 0.99                                     |
| BN2-76   | ±0.70       | -0.70    | 0.21                                     | 0.50     | ±0.60    | 0.51                                     | ±0.70    | -0.60    | 0.95                                     |
| BN2-77   | ±3.20       | ±0.60    | 0.17                                     | 0.00     | 0.00     | 0.56                                     | ±3.10    | ±0.60    | 0.64                                     |
| BN2-78   | ±1.30       | ±0.80    | 0.24                                     | ±1.20    | ±0.90    | 0.44                                     | ±1.20    | ±0.90    | 0.99                                     |
| BN2-79   | ±4.90       | ±1.10    | 0.25                                     | 0.00     | 0.10     | 2.90                                     | ±4.90    | ±1.10    | 0.44                                     |
| BN2-80   | ±0.50       | ±0.70    | 0.15                                     | ±0.50    | ±0.60    | 0.40                                     | ±0.50    | ±0.70    | 0.98                                     |
| BN2-81   | 0.00        | ±0.60    | 0.12                                     | 0.00     | 0.00     | 0.51                                     | 0.00     | -0.40    | 0.87                                     |

| Molecule | Without DDM |          |                                          | With DDM |          |                                          | Overlap  |          |                                          |
|----------|-------------|----------|------------------------------------------|----------|----------|------------------------------------------|----------|----------|------------------------------------------|
|          | x<br>(Å)    | y<br>(Å) | $ T_{RP} _{NAC}^2$<br>(Å <sup>-2</sup> ) | x<br>(Å) | y<br>(Å) | $ T_{RP} _{NAC}^2$<br>(Å <sup>-2</sup> ) | x<br>(Å) | y<br>(Å) | $ T_{RP} _{NAC}^2$<br>(Å <sup>-2</sup> ) |
| BN2-82   | ±0.80       | ±0.80    | 0.07                                     | 0.00     | -0.10    | 0.40                                     | -0.10    | -0.20    | 0.64                                     |
| BN2-83   | -2.70       | -0.80    | 0.08                                     | 0.00     | 0.00     | 0.38                                     | ±0.20    | -0.50    | 0.78                                     |
| BN2-84   | ±3.20       | ±0.60    | 0.09                                     | 0.00     | 0.00     | 0.42                                     | 0.00     | ±0.20    | 0.64                                     |
| BN2-85   | 2.80        | ±0.80    | 0.10                                     | 0.00     | 0.00     | 0.46                                     | 0.20     | ±0.50    | 0.86                                     |
| BN2-86   | ±3.00       | ±0.40    | 0.13                                     | 0.00     | ±0.10    | 1.26                                     | ±2.90    | ±0.40    | 0.45                                     |
| BN2-87   | ±2.70       | ±0.80    | 0.13                                     | 0.00     | 0.00     | 0.45                                     | ±2.80    | ±0.70    | 0.59                                     |
| BN2-88   | 0.00        | ±0.80    | 0.06                                     | 0.00     | 0.00     | 0.22                                     | ±0.10    | ±0.60    | 0.85                                     |
| BN2-89   | ±3.00       | ±0.30    | 0.12                                     | 0.00     | 0.00     | 0.44                                     | ±2.90    | ±0.30    | 0.70                                     |
| BN2-90   | ±2.80       | ±0.20    | 0.09                                     | 0.00     | 0.00     | 0.70                                     | 0.00     | 0.40     | 0.45                                     |
| BN2-91   | ±3.60       | ±0.20    | 0.08                                     | 0.00     | 0.00     | 0.24                                     | ±3.60    | ±0.20    | 0.66                                     |
| BN2-92   | ±2.80       | ±0.60    | 0.22                                     | 0.00     | 0.00     | 1.45                                     | ±0.80    | ±0.90    | 0.45                                     |
| BN2-93   | ±3.00       | ±0.20    | 0.09                                     | 0.00     | 0.00     | 1.24                                     | 0.00     | 0.10     | 0.67                                     |
| BN2-94   | ±3.50       | ±0.40    | 0.19                                     | 3.50     | 0.40     | 0.37                                     | ±3.50    | ±0.40    | 1.00                                     |
| BN2-95   | ±2.80       | ±0.70    | 0.24                                     | ±0.10    | 0.20     | 2.39                                     | ±0.10    | 0.20     | 0.36                                     |
| BN2-96   | ±3.00       | ±0.10    | 0.11                                     | 0.00     | 0.00     | 0.64                                     | ±2.90    | ±0.10    | 0.65                                     |
| BN2-97   | ±2.90       | ±0.30    | 0.11                                     | 0.00     | 0.00     | 1.61                                     | 0.00     | -0.10    | 0.45                                     |
| BN2-98   | 0.00        | ±0.80    | 0.10                                     | 0.00     | ±0.70    | 0.21                                     | 0.00     | ±0.70    | 0.98                                     |
| BN2-99   | ±0.20       | ±0.90    | 0.09                                     | 0.00     | ±0.60    | 0.21                                     | 0.00     | ±0.80    | 0.97                                     |
| BN2-100  | ±3.00       | 0.00     | 0.11                                     | 0.00     | 0.00     | 0.87                                     | ±2.90    | 0.00     | 0.46                                     |
| BN2-101  | 0.00        | ±0.60    | 0.06                                     | 0.00     | ±0.10    | 0.48                                     | 0.00     | ±0.10    | 0.91                                     |
| BN2-102  | ±0.40       | 0.70     | 0.08                                     | 0.00     | 0.00     | 0.39                                     | ±0.30    | ±0.60    | 0.83                                     |
| BN2-103  | 0.00        | ±0.80    | 0.06                                     | 0.00     | 0.00     | 0.37                                     | 0.00     | -0.30    | 0.78                                     |
| BN2-104  | ±0.20       | -0.50    | 0.06                                     | 0.00     | 0.00     | 0.33                                     | 0.00     | 0.00     | 0.93                                     |
| BN2-105  | ±2.70       | ±0.70    | 0.12                                     | 0.00     | 0.00     | 0.36                                     | ±2.70    | ±0.60    | 0.81                                     |
| BN2-106  | ±3.60       | ±0.20    | 0.08                                     | 0.00     | 0.00     | 0.26                                     | ±3.60    | ±0.20    | 0.62                                     |
| BN2-107  | ±2.90       | ±0.60    | 0.12                                     | -0.10    | ±0.20    | 0.47                                     | ±2.90    | ±0.50    | 0.63                                     |
| BN2-108  | ±3.60       | ±0.40    | 0.30                                     | ±3.60    | ±0.40    | 0.64                                     | ±3.60    | ±0.40    | 1.00                                     |
| BN2-109  | ±2.60       | ±0.80    | 0.09                                     | 0.00     | 0.00     | 0.42                                     | -0.10    | ±0.40    | 0.72                                     |
| BN2-110  | ±3.00       | 0.00     | 0.19                                     | 0.00     | 0.00     | 4.93                                     | 0.00     | 0.00     | 0.42                                     |
| BN2-111  | ±2.50       | ±0.80    | 0.20                                     | ±2.50    | ±0.80    | 0.52                                     | ±2.50    | ±0.80    | 1.00                                     |
| BN2-112  | 0.00        | 0.40     | 0.07                                     | 0.00     | 0.00     | 0.55                                     | 0.00     | 0.00     | 0.98                                     |
| BN2-113  | ±0.10       | ±0.80    | 0.09                                     | 0.00     | 0.00     | 0.37                                     | 0.00     | ±0.50    | 0.78                                     |
| BN2-114  | ±0.10       | ±0.80    | 0.26                                     | ±0.20    | ±0.80    | 0.46                                     | ±0.20    | ±0.80    | 1.00                                     |
| BN2-115  | ±0.20       | ±0.80    | 0.17                                     | ±0.20    | ±0.80    | 0.34                                     | ±0.20    | ±0.80    | 1.00                                     |
| BN2-116  | ±2.80       | ±0.20    | 0.19                                     | ±2.80    | ±0.10    | 0.62                                     | ±2.80    | ±0.10    | 0.99                                     |
| BN2-117  | ±1.50       | ±1.00    | 0.13                                     | ±0.20    | -0.10    | 0.48                                     | ±1.40    | ±1.00    | 0.57                                     |
| BN2-118  | ±0.10       | ±0.80    | 0.31                                     | ±0.10    | ±0.80    | 0.56                                     | ±0.10    | ±0.80    | 1.00                                     |
| BN2-119  | ±0.20       | ±0.70    | 0.10                                     | 0.00     | 0.00     | 0.41                                     | -0.20    | ±0.50    | 0.76                                     |
| BN2-120  | ±0.30       | ±1.00    | 0.16                                     | ±0.30    | ±1.00    | 0.27                                     | ±0.30    | ±1.00    | 1.00                                     |
| BN2-121  | 0.00        | ±0.70    | 0.22                                     | 0.00     | ±0.60    | 0.56                                     | 0.00     | ±0.70    | 0.98                                     |
| BN2-122  | ±2.90       | ±0.10    | 0.10                                     | 0.00     | 0.00     | 1.39                                     | 0.00     | 0.00     | 0.37                                     |
| BN2-123  | ±0.30       | ±0.90    | 0.16                                     | ±0.30    | ±0.80    | 0.31                                     | ±0.30    | ±0.90    | 0.98                                     |
| BN2-124  | ±0.10       | ±0.80    | 0.15                                     | ±0.20    | ±0.80    | 0.30                                     | ±0.20    | ±0.80    | 1.00                                     |
| BN2-125  | ±0.20       | ±0.90    | 0.10                                     | ±0.20    | ±0.80    | 0.22                                     | ±0.20    | ±0.80    | 0.98                                     |
| BN2-126  | ±0.20       | ±1.10    | 0.36                                     | ±0.20    | ±0.90    | 0.91                                     | ±0.20    | ±1.10    | 0.94                                     |
| BN2-127  | ±2.80       | ±0.40    | 0.47                                     | ±2.70    | ±0.50    | 0.83                                     | ±2.70    | ±0.50    | 1.00                                     |
| BN2-128  | ±0.10       | ±0.80    | 0.10                                     | ±0.10    | ±0.70    | 0.21                                     | ±0.10    | ±0.70    | 0.98                                     |
| BN2-129  | ±0.20       | ±0.90    | 0.16                                     | ±0.20    | ±0.80    | 0.29                                     | ±0.20    | ±0.80    | 0.99                                     |

| Molecule | Without DDM |          |                                          | With DDM |          |                                          | Overlap  |          |                                          |
|----------|-------------|----------|------------------------------------------|----------|----------|------------------------------------------|----------|----------|------------------------------------------|
|          | x<br>(Å)    | y<br>(Å) | $ T_{RP} _{NAC}^2$<br>(Å <sup>-2</sup> ) | x<br>(Å) | y<br>(Å) | $ T_{RP} _{NAC}^2$<br>(Å <sup>-2</sup> ) | x<br>(Å) | y<br>(Å) | $ T_{RP} _{NAC}^2$<br>(Å <sup>-2</sup> ) |
| BN2-130  | ±0.70       | ±0.80    | 0.09                                     | ∓0.40    | 0.40     | 0.26                                     | ∓0.60    | ±0.70    | 0.94                                     |
| BN2-131  | ±0.30       | ∓0.80    | 0.16                                     | 0.40     | ∓0.50    | 0.41                                     | ±0.30    | ∓0.80    | 0.95                                     |
| BN2-132  | ±2.50       | ±0.60    | 0.20                                     | 0.00     | 0.00     | 0.63                                     | ±2.50    | ±0.60    | 0.76                                     |
| BN2-133  | 0.00        | ∓0.80    | 0.23                                     | 0.00     | ∓0.80    | 0.42                                     | 0.00     | ∓0.80    | 1.00                                     |
| BN2-134  | 0.00        | ±0.90    | 0.19                                     | 0.00     | ±0.80    | 0.35                                     | 0.00     | ±0.80    | 1.00                                     |
| BN2-135  | 0.00        | ∓0.90    | 0.13                                     | 0.00     | ∓0.60    | 0.32                                     | 0.00     | ∓0.70    | 0.91                                     |
| BN2-136  | ∓0.50       | ±1.10    | 0.15                                     | ∓0.40    | ±1.00    | 0.30                                     | ∓0.50    | ±1.00    | 0.99                                     |
| BN2-137  | 0.00        | ∓0.80    | 0.14                                     | 0.00     | -0.50    | 0.36                                     | 0.00     | ∓0.70    | 0.90                                     |
| BN2-138  | ∓0.20       | ±0.70    | 0.16                                     | ∓0.20    | ±0.60    | 0.42                                     | ∓0.20    | ±0.70    | 0.98                                     |
| BN2-139  | ±0.60       | ∓0.90    | 0.23                                     | ±0.60    | ∓0.90    | 0.48                                     | ±0.60    | ∓0.90    | 1.00                                     |
| BN2-140  | 0.00        | ±0.70    | 0.16                                     | 0.00     | 0.00     | 0.53                                     | 0.00     | ±0.50    | 0.87                                     |
| BN2-141  | ±0.70       | ∓0.90    | 0.11                                     | 0.30     | -0.30    | 0.41                                     | ±0.50    | ∓0.70    | 0.89                                     |
| BN2-142  | ±3.40       | ±0.50    | 0.28                                     | ±3.40    | ±0.50    | 0.48                                     | ±3.40    | ±0.50    | 1.00                                     |
| BN2-143  | 0.00        | ±0.80    | 0.14                                     | 0.00     | ±0.70    | 0.26                                     | 0.00     | ±0.80    | 0.99                                     |
| BN2-144  | ∓0.60       | ±1.40    | 0.24                                     | 0.00     | 0.00     | 3.22                                     | ∓0.10    | 0.30     | 0.56                                     |
| BN2-145  | ∓0.40       | ±0.80    | 0.56                                     | ∓0.30    | ±0.70    | 1.29                                     | ∓0.40    | ±0.70    | 1.00                                     |
| BN2-146  | 0.00        | ±0.80    | 0.20                                     | 0.00     | ±0.80    | 0.37                                     | 0.00     | ±0.80    | 1.00                                     |
| BN2-147  | ∓5.00       | ∓0.90    | 0.16                                     | 0.00     | 0.00     | 1.74                                     | ∓5.00    | ∓0.90    | 0.38                                     |
| BN2-148  | ∓0.70       | -0.60    | 0.13                                     | ∓0.80    | ∓0.40    | 0.28                                     | ∓0.70    | ∓0.60    | 1.00                                     |
| BN2-149  | ∓1.40       | ∓1.00    | 0.18                                     | 0.00     | 0.00     | 0.54                                     | ∓0.90    | ∓0.80    | 0.78                                     |
| BN2-150  | ∓0.90       | ∓0.80    | 0.12                                     | ∓0.60    | ∓0.50    | 0.46                                     | ∓0.80    | ∓0.70    | 0.95                                     |
| BN2-151  | ∓0.60       | ∓0.80    | 0.10                                     | 0.00     | 0.00     | 0.38                                     | ∓0.50    | ∓0.70    | 0.78                                     |
| BN2-152  | ∓0.90       | ∓1.20    | 0.13                                     | 0.00     | -0.10    | 2.82                                     | 0.00     | -0.10    | 0.60                                     |
| BN2-153  | ∓0.60       | ∓0.60    | 0.08                                     | 0.00     | 0.00     | 0.39                                     | 0.00     | 0.00     | 0.83                                     |
| BN2-154  | ∓0.40       | ∓0.80    | 0.05                                     | 0.00     | 0.00     | 0.34                                     | ±0.20    | -0.10    | 0.68                                     |
| BN2-155  | ±2.70       | ∓0.70    | 0.23                                     | 0.00     | 0.00     | 1.68                                     | 0.00     | ±0.10    | 0.36                                     |
| BN2-156  | ∓0.40       | ∓0.80    | 0.10                                     | 0.00     | 0.00     | 1.85                                     | ∓0.10    | -0.20    | 0.73                                     |
| BN2-157  | ±3.60       | 0.00     | 0.07                                     | 0.40     | 0.50     | 0.17                                     | ±0.40    | ±0.60    | 0.90                                     |
| BN2-158  | ±0.30       | ±1.00    | 0.15                                     | 0.00     | 0.00     | 0.81                                     | ±0.30    | ±0.70    | 0.76                                     |
| BN2-159  | ±3.00       | ∓0.50    | 0.16                                     | 0.00     | 0.00     | 0.65                                     | ±3.00    | ∓0.40    | 0.66                                     |
| BN2-160  | ±0.30       | ±0.80    | 0.13                                     | ±0.50    | ±0.70    | 0.30                                     | ±0.40    | ±0.70    | 0.98                                     |
| BN2-161  | 0.00        | ±0.70    | 0.11                                     | 0.00     | 0.00     | 2.06                                     | 0.00     | 0.00     | 0.91                                     |
| BN2-162  | ±2.70       | ∓0.80    | 0.18                                     | 0.00     | 0.00     | 5.48                                     | 0.00     | 0.00     | 0.65                                     |
| BN2-163  | ∓2.90       | ∓0.10    | 0.12                                     | 0.00     | 0.00     | 0.85                                     | ∓2.90    | ∓0.10    | 0.44                                     |
| BN2-164  | ∓1.10       | ∓0.70    | 0.19                                     | ∓0.90    | ∓0.50    | 0.46                                     | ∓1.00    | ∓0.60    | 0.98                                     |
| BN2-165  | ±2.70       | ∓0.60    | 0.09                                     | 0.00     | 0.00     | 0.45                                     | ∓0.30    | -0.20    | 0.64                                     |
| BN2-166  | ∓0.90       | ∓0.80    | 0.10                                     | 0.00     | 0.00     | 0.41                                     | ∓0.70    | ∓0.70    | 0.78                                     |
| BN2-167  | ∓0.90       | ∓0.80    | 0.08                                     | 0.00     | 0.00     | 0.38                                     | ∓0.50    | ∓0.70    | 0.67                                     |
| BN2-168  | ±3.60       | ∓0.20    | 0.17                                     | 0.00     | 0.00     | 0.44                                     | ±3.60    | ∓0.20    | 0.94                                     |
| BN2-169  | ∓0.80       | ∓0.80    | 0.12                                     | ±0.30    | ±0.30    | 0.40                                     | ∓0.60    | ∓0.70    | 0.89                                     |
| BN2-170  | ±1.00       | ±0.70    | 0.17                                     | ±0.80    | ±0.60    | 0.46                                     | ±0.90    | ±0.70    | 0.98                                     |
| BN2-171  | ±3.50       | 0.00     | 0.09                                     | 0.00     | 0.00     | 0.51                                     | 0.00     | ±0.10    | 0.77                                     |
| BN2-172  | ±3.80       | 0.00     | 0.19                                     | 0.00     | 0.00     | 0.46                                     | ±3.80    | 0.00     | 0.91                                     |
| BN2-173  | ∓0.90       | ∓0.50    | 0.12                                     | 0.00     | 0.00     | 0.43                                     | ∓0.70    | ∓0.40    | 0.84                                     |
| BN2-174  | ±4.90       | ±1.10    | 0.36                                     | 0.00     | 0.10     | 5.46                                     | ±4.90    | ±1.10    | 0.42                                     |
| BN2-175  | ±0.80       | ±0.50    | 0.08                                     | 0.00     | 0.00     | 0.28                                     | ±0.70    | ±0.50    | 0.82                                     |
| BN2-176  | ∓3.70       | ±0.40    | 2.57                                     | ∓3.70    | ±0.40    | 5.68                                     | ∓3.70    | ±0.40    | 1.00                                     |
| BN2-177  | ∓1.40       | ±0.80    | 9.05                                     | ∓1.40    | ±0.80    | 26.42                                    | ∓1.40    | ±0.80    | 1.00                                     |

| Molecule | Without DDM |          |                                          | With DDM |          |                                          | Overlap  |          |                                          |
|----------|-------------|----------|------------------------------------------|----------|----------|------------------------------------------|----------|----------|------------------------------------------|
|          | x<br>(Å)    | y<br>(Å) | $ T_{RP} _{NAC}^2$<br>(Å <sup>-2</sup> ) | x<br>(Å) | y<br>(Å) | $ T_{RP} _{NAC}^2$<br>(Å <sup>-2</sup> ) | x<br>(Å) | y<br>(Å) | $ T_{RP} _{NAC}^2$<br>(Å <sup>-2</sup> ) |
| BN2-178  | ±2.80       | ∓0.40    | 0.20                                     | 0.00     | 0.00     | 0.81                                     | ±2.90    | ∓0.30    | 0.69                                     |
| BN2-179  | ±0.60       | ∓0.70    | 0.18                                     | ±0.60    | ∓0.60    | 0.34                                     | ±0.70    | ∓0.60    | 0.98                                     |
| BN2-180  | ∓0.20       | ∓1.10    | 0.37                                     | ∓0.20    | ∓0.90    | 0.82                                     | ∓0.20    | ∓1.00    | 0.99                                     |
| BN2-181  | ∓0.20       | ∓0.90    | 0.36                                     | ∓0.20    | ∓0.90    | 0.69                                     | ∓0.20    | ∓0.90    | 1.00                                     |
| BN2-182  | 0.00        | ∓0.90    | 0.14                                     | 0.00     | ∓0.80    | 0.28                                     | 0.00     | ∓0.90    | 0.99                                     |
| BN2-183  | ∓0.40       | ∓0.80    | 0.14                                     | ∓0.40    | ∓0.80    | 0.29                                     | ∓0.40    | ∓0.80    | 1.00                                     |
| BN2-184  | ∓3.50       | ±0.40    | 0.21                                     | ±3.60    | ∓0.40    | 0.42                                     | ∓3.60    | ±0.40    | 0.99                                     |
| BN2-185  | ∓3.80       | 0.00     | 0.73                                     | ∓3.80    | 0.00     | 1.67                                     | ∓3.80    | 0.00     | 1.00                                     |
| BN2-186  | ±0.80       | 0.00     | 0.25                                     | ±0.60    | ∓0.10    | 0.66                                     | ±0.70    | ∓0.10    | 0.98                                     |
| BN2-187  | ±3.10       | ∓0.60    | 0.19                                     | 0.00     | 0.00     | 0.91                                     | ±3.00    | ∓0.50    | 0.52                                     |
| BN2-188  | ∓1.50       | ∓0.80    | 0.16                                     | ∓1.50    | ∓0.80    | 0.32                                     | ∓1.50    | ∓0.80    | 1.00                                     |
| BN2-189  | ∓3.60       | ±0.20    | 0.17                                     | ∓0.30    | ∓0.50    | 0.45                                     | ∓0.30    | ∓0.60    | 0.93                                     |
| BN2-190  | ±1.80       | ±1.20    | 0.30                                     | ±1.80    | ±1.20    | 0.61                                     | ±1.80    | ±1.20    | 1.00                                     |
| BN2-191  | 0.00        | ±0.80    | 0.17                                     | 0.00     | 0.20     | 0.51                                     | 0.00     | ±0.70    | 0.89                                     |
| BN2-192  | ∓0.10       | ±0.70    | 0.20                                     | ∓0.20    | ±0.30    | 0.53                                     | ∓0.10    | ±0.60    | 0.96                                     |
| BN2-193  | ∓0.60       | ±0.90    | 0.64                                     | ∓0.60    | ±0.90    | 1.27                                     | ∓0.60    | ±0.90    | 1.00                                     |
| BN2-194  | ±0.40       | ±0.60    | 0.41                                     | ±0.40    | 0.50     | 1.07                                     | ±0.40    | ±0.50    | 0.98                                     |
| BN2-195  | ±3.80       | 0.00     | 0.55                                     | ±3.80    | ∓0.10    | 1.06                                     | ±3.80    | 0.00     | 0.99                                     |
| BN2-196  | ∓1.60       | ∓1.00    | 0.21                                     | ∓1.60    | ∓1.00    | 0.40                                     | ∓1.60    | ∓1.00    | 1.00                                     |
| BN2-197  | ∓0.30       | ±0.60    | 0.53                                     | -0.20    | ±0.50    | 1.48                                     | ∓0.30    | ±0.50    | 0.97                                     |
| BN2-198  | ∓0.30       | ∓0.70    | 0.32                                     | ∓0.30    | ∓0.60    | 0.75                                     | ∓0.30    | ∓0.60    | 0.99                                     |
| BN2-199  | ∓0.50       | ∓1.50    | 0.10                                     | 0.00     | 0.00     | 1.30                                     | 0.00     | -0.20    | 0.47                                     |
| BN2-200  | ±1.10       | ∓0.60    | 0.18                                     | 0.00     | 0.00     | 0.41                                     | ±0.90    | ∓0.50    | 0.86                                     |
| BN2-201  | ∓0.90       | ±0.20    | 0.32                                     | ∓0.80    | ±0.30    | 0.86                                     | ∓0.80    | ±0.30    | 0.99                                     |
| BN2-202  | ∓0.30       | ±0.80    | 0.12                                     | ∓0.30    | ±0.70    | 0.25                                     | ∓0.30    | ±0.80    | 0.99                                     |
| BN2-203  | 0.00        | ∓0.90    | 0.37                                     | 0.00     | ∓0.80    | 0.75                                     | 0.00     | ∓0.80    | 1.00                                     |
| BN2-204  | -2.70       | 0.20     | 36.88                                    | -2.70    | 0.20     | 88.62                                    | -2.70    | 0.20     | 1.00                                     |
| BN2-205  | ±3.00       | ∓0.10    | 12.86                                    | ±3.00    | ∓0.10    | 30.96                                    | ±3.00    | ∓0.10    | 1.00                                     |
| BN2-206  | ±0.60       | ∓0.70    | 0.21                                     | ∓0.70    | ±0.50    | 0.67                                     | ±0.70    | ∓0.60    | 0.93                                     |
| BN2-207  | ±2.80       | ∓0.10    | 0.14                                     | ±2.80    | 0.00     | 0.47                                     | ±2.80    | ∓0.10    | 0.99                                     |
| BN2-208  | 2.70        | ±0.70    | 3.92                                     | 2.70     | ±0.70    | 6.65                                     | 2.70     | ±0.70    | 1.00                                     |
| BN2-209  | 0.00        | ±0.80    | 0.12                                     | 0.00     | 0.00     | 0.40                                     | 0.00     | ±0.60    | 0.85                                     |
| BN2-210  | 0.00        | ±0.90    | 0.17                                     | ±0.30    | ±0.60    | 0.38                                     | ±0.20    | ±0.80    | 0.98                                     |
| BN2-211  | 0.00        | ∓0.80    | 0.10                                     | 0.00     | ∓0.20    | 0.27                                     | ±0.20    | ∓0.60    | 0.89                                     |
| BN2-212  | ±0.30       | ∓0.60    | 0.12                                     | 0.30     | -0.40    | 0.33                                     | 0.30     | -0.50    | 0.96                                     |
| BN2-213  | -4.90       | 0.50     | 18.79                                    | ∓2.40    | -0.50    | 43.90                                    | -4.90    | 0.50     | 0.96                                     |
| BN2-214  | ∓3.00       | 0.10     | 17.53                                    | -3.00    | 0.10     | 48.49                                    | -3.00    | 0.10     | 1.00                                     |
| BN2-215  | ∓0.70       | ∓0.50    | 0.13                                     | 0.00     | 0.00     | 0.32                                     | -0.50    | ±0.50    | 0.88                                     |
| BN2-216  | ∓0.20       | -2.50    | 2.19                                     | ∓0.10    | -2.50    | 4.68                                     | ∓0.10    | -2.50    | 1.00                                     |
| BN2-217  | ∓3.00       | -0.10    | 0.18                                     | 0.00     | 0.00     | 3.26                                     | 0.00     | ±0.10    | 0.38                                     |
| BN2-218  | ∓2.90       | ∓0.10    | 0.42                                     | ∓2.90    | ∓0.10    | 1.16                                     | ∓2.90    | ∓0.10    | 1.00                                     |
| BN2-219  | ∓2.70       | ∓0.50    | 0.12                                     | ∓2.70    | ∓0.40    | 0.36                                     | ∓2.70    | ∓0.40    | 1.00                                     |
| BN2-220  | ∓2.90       | ±0.40    | 0.12                                     | 0.00     | 0.00     | 1.66                                     | 0.00     | ∓0.10    | 0.44                                     |
| BN2-221  | ∓2.80       | ±0.30    | 0.14                                     | 0.00     | 0.10     | 1.56                                     | 0.00     | ∓0.10    | 0.43                                     |
| BN2-222  | ∓2.90       | 0.00     | 0.16                                     | 0.00     | 0.00     | 0.81                                     | ∓2.90    | 0.00     | 0.65                                     |
| BN2-223  | ∓2.90       | ±0.10    | 0.12                                     | 0.00     | 0.00     | 1.83                                     | 0.00     | 0.00     | 0.45                                     |
| BN2-224  | ∓2.80       | ±0.60    | 0.11                                     | 0.00     | 0.00     | 0.75                                     | ∓2.80    | ±0.50    | 0.53                                     |
| BN2-225  |             |          |                                          |          |          |                                          |          |          |                                          |



| Molecule         | Without DDM |          |                                          | With DDM |          |                                          | Overlap  |          |                                          |
|------------------|-------------|----------|------------------------------------------|----------|----------|------------------------------------------|----------|----------|------------------------------------------|
|                  | x<br>(Å)    | y<br>(Å) | $ T_{RP} _{NAC}^2$<br>(Å <sup>-2</sup> ) | x<br>(Å) | y<br>(Å) | $ T_{RP} _{NAC}^2$<br>(Å <sup>-2</sup> ) | x<br>(Å) | y<br>(Å) | $ T_{RP} _{NAC}^2$<br>(Å <sup>-2</sup> ) |
| BN2-226          | ±0.20       | ∓1.30    | 0.22                                     | 0.00     | 0.00     | 6.82                                     | 0.00     | -0.30    | 0.65                                     |
| BN2-227          | ∓3.00       | 0.00     | 0.25                                     | 0.00     | 0.00     | 1.34                                     | ∓3.00    | ∓0.10    | 0.70                                     |
| BN2-228          | ±0.50       | ±1.40    | 0.07                                     | 0.00     | 0.00     | 1.05                                     | 0.00     | 0.00     | 0.61                                     |
| BN2-229          | ±2.70       | ∓0.30    | 0.14                                     | 0.00     | ±0.10    | 2.58                                     | 0.00     | ±0.10    | 0.57                                     |
| BN2-230          | ±3.00       | ±0.40    | 0.11                                     | 0.00     | 0.00     | 0.69                                     | ±3.00    | ±0.30    | 0.52                                     |
| BN2-231          | ±0.90       | ∓0.40    | 2.70                                     | ±0.90    | ∓0.50    | 8.52                                     | ±0.90    | ∓0.50    | 1.00                                     |
| BN2-232          | 0.00        | ±0.80    | 0.13                                     | ∓0.10    | ±0.70    | 0.29                                     | 0.00     | ±0.80    | 0.99                                     |
| BN2-233          | ∓2.70       | ∓0.20    | 0.05                                     | 0.00     | 0.00     | 0.76                                     | -0.10    | 0.30     | 0.61                                     |
| BN2-234          | ±4.80       | ∓0.60    | 0.13                                     | ∓0.10    | ±0.50    | 0.33                                     | ±4.80    | ∓0.60    | 0.98                                     |
| BN2-235          | ±0.60       | ±0.50    | 0.57                                     | ±0.50    | ±0.50    | 1.40                                     | ±0.60    | ±0.50    | 0.99                                     |
| BN2-236          | 0.00        | ±0.80    | 0.13                                     | 0.00     | ±0.60    | 0.35                                     | 0.00     | ±0.70    | 0.97                                     |
| BN2-237          | ±0.20       | ∓0.70    | 0.14                                     | ±0.30    | ∓0.60    | 0.42                                     | ±0.20    | ∓0.70    | 0.99                                     |
| BN2-238          | ∓0.30       | ∓0.70    | 0.35                                     | ∓0.30    | ∓0.60    | 0.90                                     | ∓0.40    | ∓0.60    | 0.99                                     |
| BN2-239          | ±0.20       | ±0.60    | 0.09                                     | ∓0.10    | 0.30     | 0.28                                     | 0.00     | ±0.50    | 0.96                                     |
| BN2-240          | ±0.50       | 0.80     | 0.23                                     | 0.30     | ±0.70    | 0.63                                     | ±0.50    | 0.70     | 0.98                                     |
| BN2-241          | ∓0.10       | ∓0.60    | 0.06                                     | 0.00     | 0.00     | 0.22                                     | 0.00     | ∓0.30    | 0.88                                     |
| BN2-242          | ±0.50       | ∓0.30    | 0.09                                     | 0.00     | 0.00     | 1.00                                     | 0.20     | -0.20    | 0.79                                     |
| BN2-243          | 0.00        | ∓0.70    | 0.08                                     | 0.00     | -0.20    | 0.42                                     | 0.00     | -0.30    | 0.81                                     |
| BN2-244          | ±0.20       | ±0.90    | 0.12                                     | 0.00     | ±0.50    | 0.34                                     | ±0.20    | ±0.80    | 0.88                                     |
| BN2-245          | ∓0.40       | ∓1.10    | 0.07                                     | 0.00     | 0.00     | 0.28                                     | 0.00     | ∓0.30    | 0.72                                     |
| BN2-246          | 0.00        | ±0.70    | 0.06                                     | 0.00     | 0.00     | 0.28                                     | -0.10    | 0.40     | 0.81                                     |
| BN2-247          | 0.00        | ±0.80    | 0.11                                     | 0.00     | ∓0.50    | 0.33                                     | 0.00     | ±0.70    | 0.93                                     |
| BN2-248          | ∓0.20       | ±0.70    | 0.12                                     | ∓0.10    | 0.30     | 0.36                                     | ∓0.20    | ±0.50    | 0.94                                     |
| BN2-249          | ±1.80       | -1.30    | 8.01                                     | ±1.80    | -1.30    | 22.02                                    | ±1.80    | -1.30    | 1.00                                     |
| BN2-250          | ±3.70       | ∓0.10    | 0.10                                     | 0.00     | -0.40    | 0.33                                     | 0.20     | -0.50    | 0.87                                     |
| BN2-251          | ∓0.70       | -0.90    | 1.20                                     | ∓0.70    | -0.80    | 2.77                                     | ∓0.70    | -0.80    | 1.00                                     |
| BN2-252          | 2.90        | 0.00     | 6.35                                     | 2.90     | 0.00     | 17.94                                    | 2.90     | 0.00     | 1.00                                     |
| BN2-253          | 0.00        | ±0.70    | 0.16                                     | 0.20     | 0.40     | 0.45                                     | ±0.20    | ±0.60    | 0.97                                     |
| BN2-254          | ±3.80       | ±0.10    | 0.59                                     | ±3.80    | ±0.10    | 1.42                                     | ±3.80    | ±0.10    | 1.00                                     |
| BN2-255          | 0.70        | ∓0.90    | 0.17                                     | 0.70     | ∓0.90    | 0.33                                     | 0.70     | ∓0.90    | 1.00                                     |
| perylene-undoped | 0.00        | ±0.80    | 0.11                                     | 0.00     | ±0.80    | 0.22                                     | 0.00     | ±0.80    | 1.00                                     |

## References

- 1 M. J. Cawkwell, E. J. Sanville, S. M. Mniszewski, and Anders M. N. Niklasson. Computing the density matrix in electronic structure theory on graphics processing units. *Journal of Chemical Theory and Computation*, 8(11):4094–4101, October 2012.
- 2 Guoqing Zhou, Ben Nebgen, Nicholas Lubbers, Walter Malone, Anders MN Niklasson, and Sergei Tretiak. Graphics processing unit-accelerated semiempirical born oppenheimer molecular dynamics using pytorch. *Journal of Chemical Theory and Computation*, 16(8):4951–4962, 2020.
- 3 Anders M. N. Niklasson. Extended born-oppenheimer molecular dynamics. *Phys. Rev. Lett.*, 100:123004, Mar 2008.
- 4 Yongseok Hong, Juno Kim, Dongho Kim, and Hyungjun Kim. Theoretical engineering of singlet fission kinetics in perylene bisimide dimer with chromophore rotation. *The Journal of Physical Chemistry A*, 125(3):875–884, January 2021.
- 5 Reinhold F. Fink, Joachim Seibt, Volker Engel, Manuel Renz, Martin Kaupp, Stefan Lochbrunner, Hong-Mei Zhao, Johannes Pfister, Frank Würthner, and Bernd Engels. Exciton trapping in  $\pi$ -conjugated materials: A quantum-chemistry-based protocol applied to perylene bisimide dye aggregates. *Journal of the American Chemical Society*, 130(39):12858–12859, September 2008.
- 6 Hong-Mei Zhao, Johannes Pfister, Volker Settels, Manuel Renz, Martin Kaupp, Volker C. Dehm, Frank Würthner, Reinhold F. Fink, and Bernd Engels. Understanding ground- and excited-state properties of perylene tetracarboxylic acid bisimide crystals by means of quantum chemical computations. *Journal of the American Chemical Society*, 131(43):15660–15668, October 2009.
